# Supplementary material
Source: ML conference proceedings conference paper supplement (https://openreview.net/forum?id=i7gGYH-wYz-)

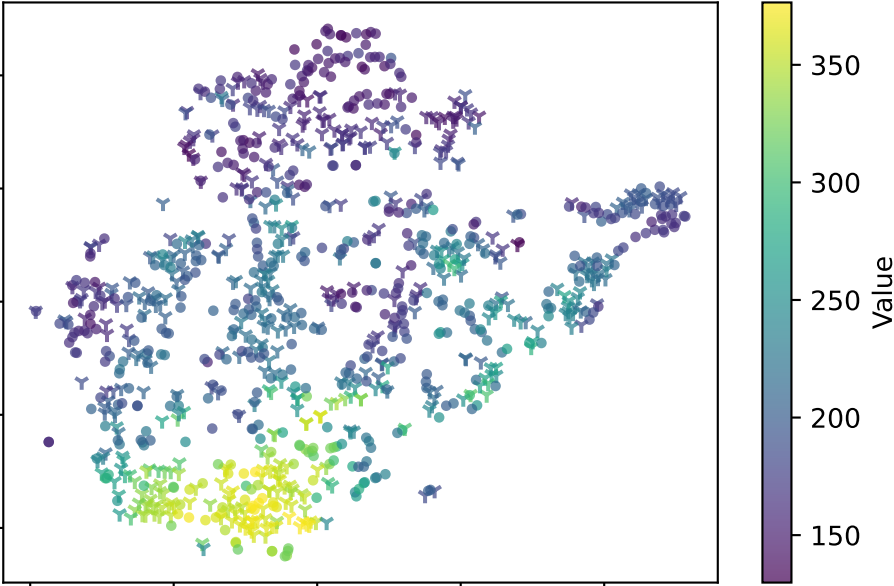

Supplement: supplementary_material [file attachment]

### State

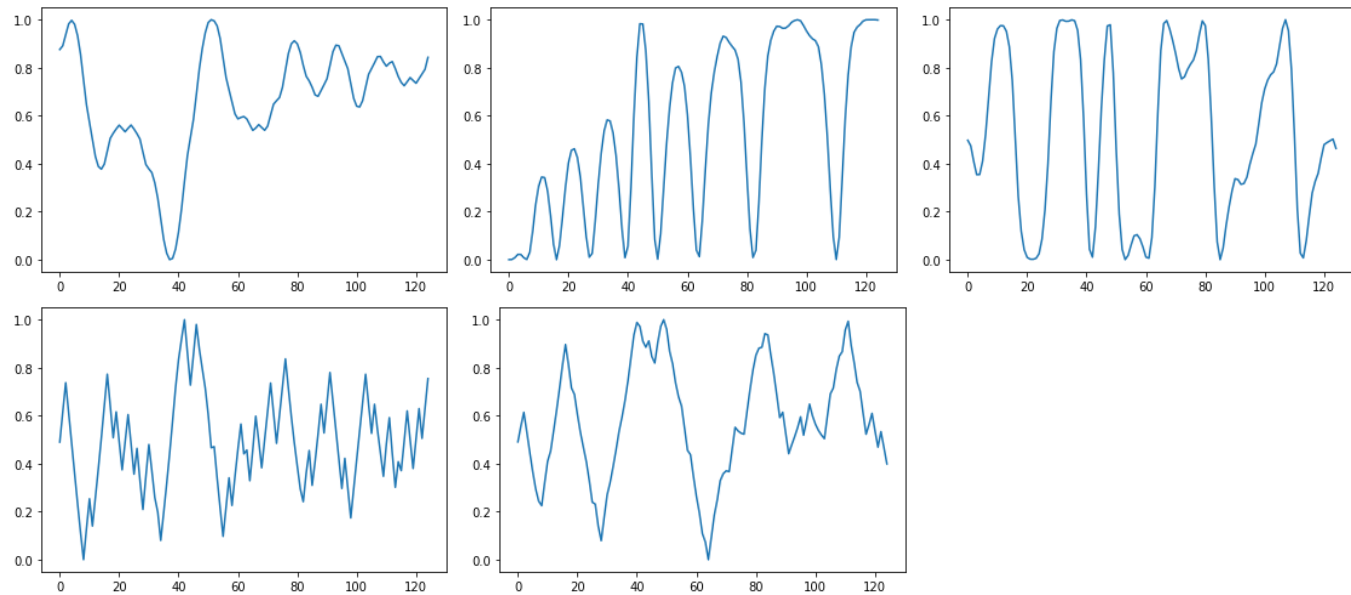

### Reward

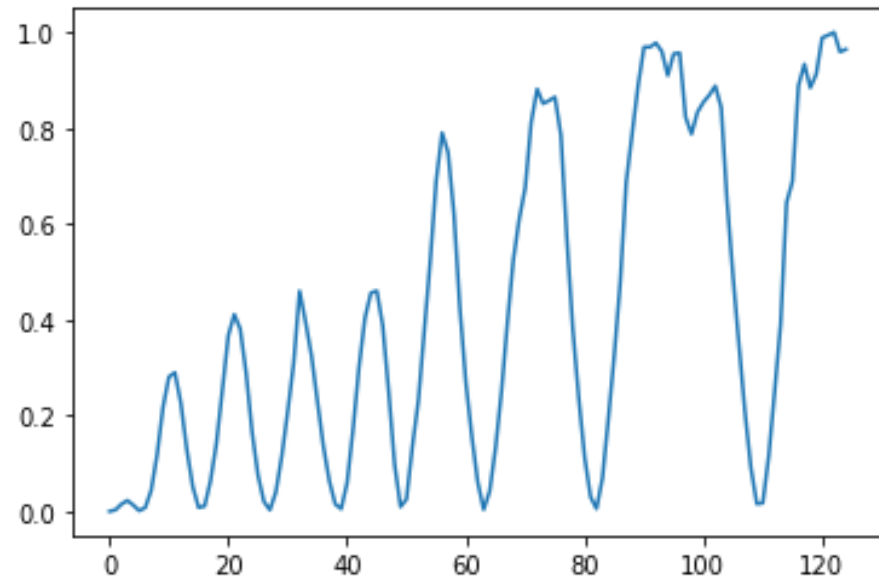

Supplement: supplementary_material [file attachment]

# State

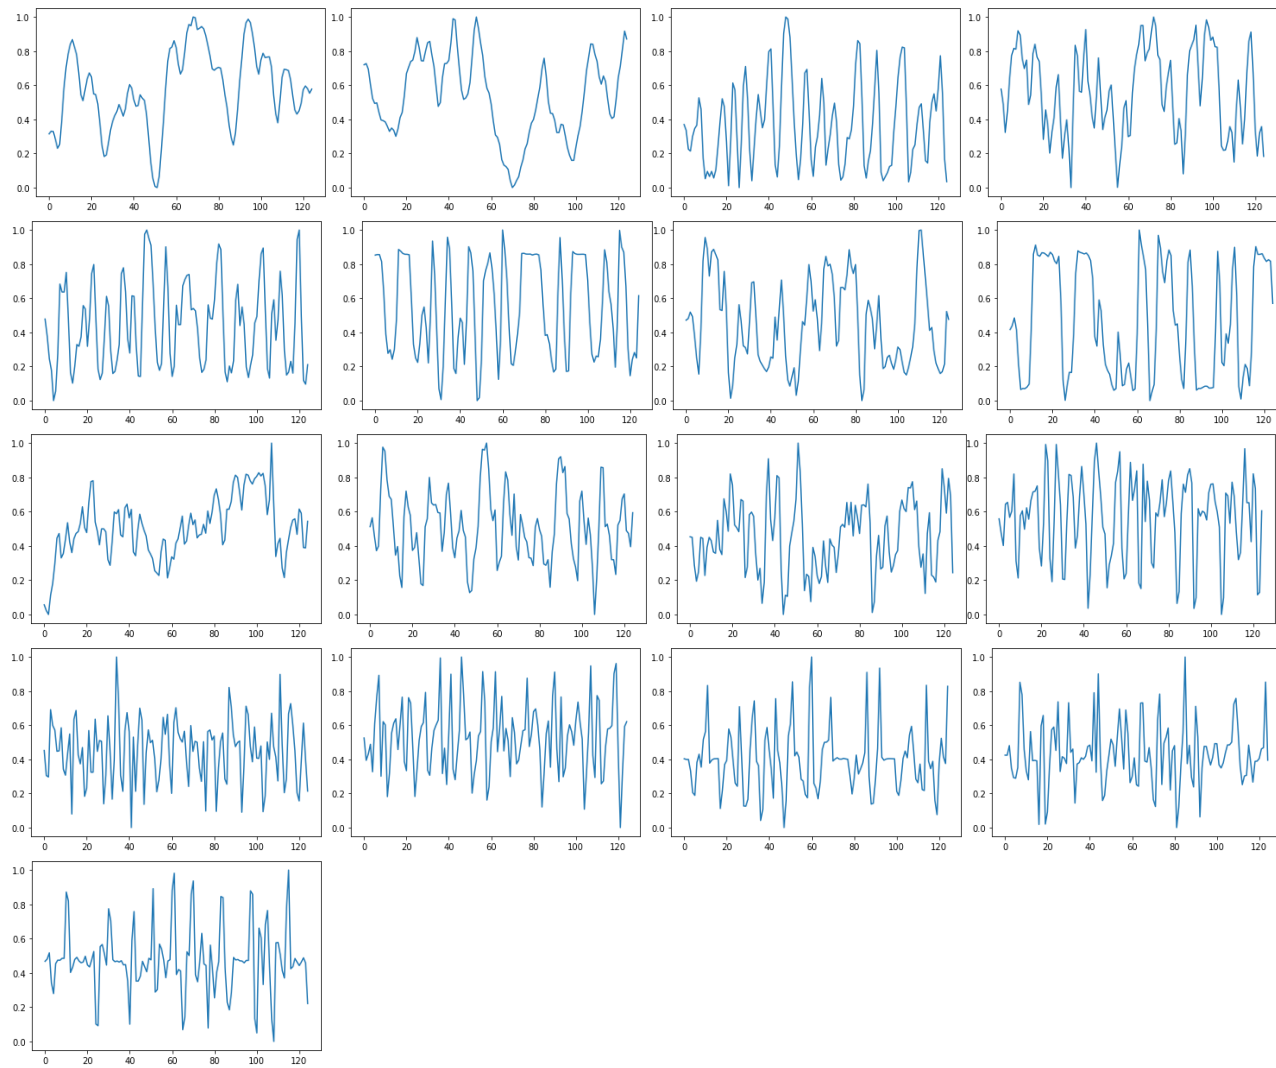

# Reward

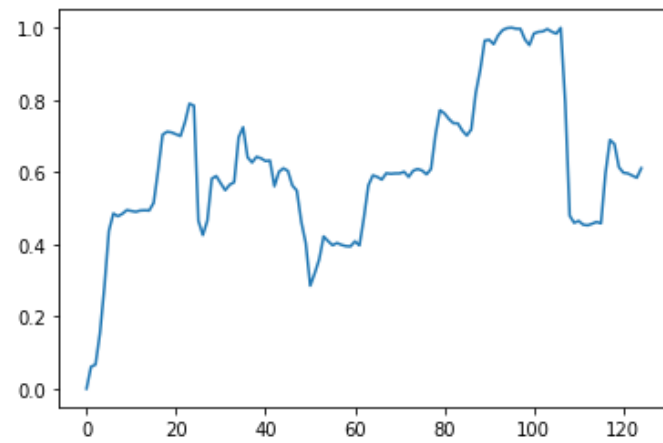

Supplement: supplementary_material [file attachment]

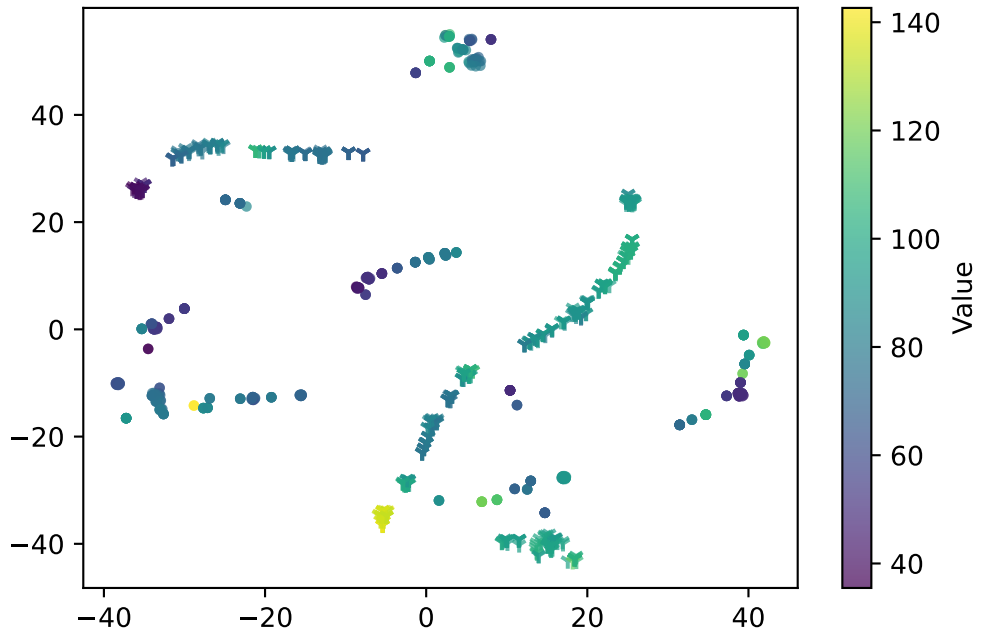

Supplement: supplementary_material [file attachment]

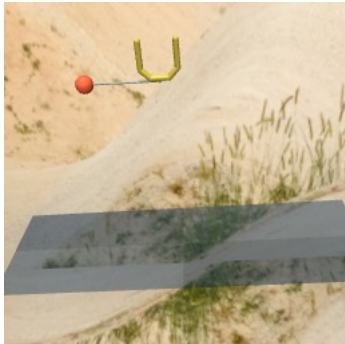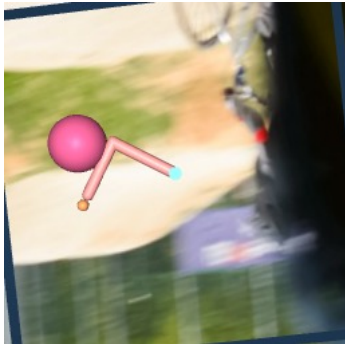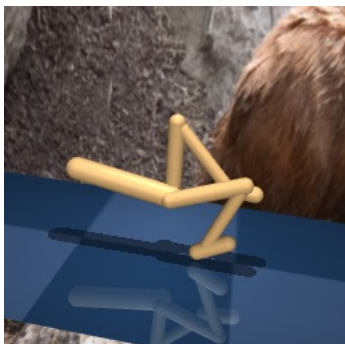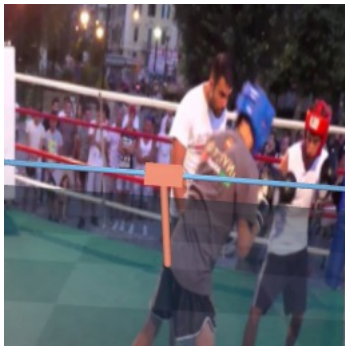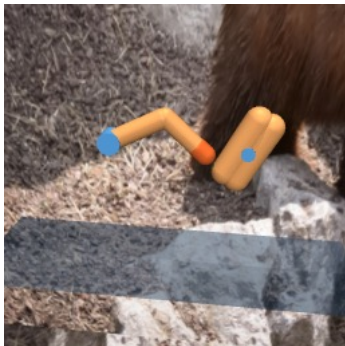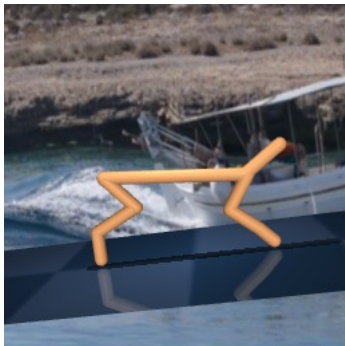

Supplement: supplementary_material [file attachment]

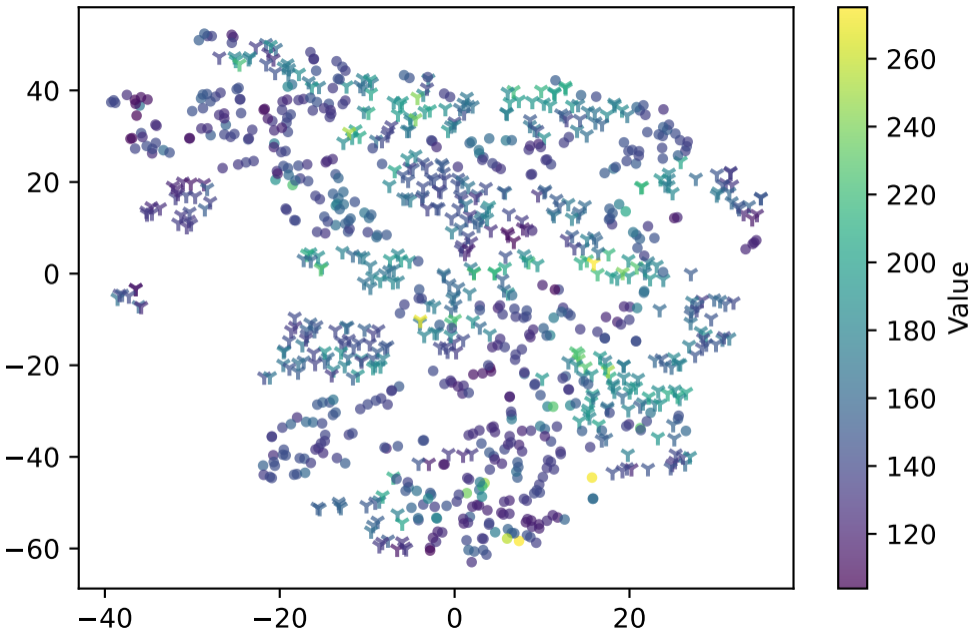

Supplement: supplementary_material [file attachment]

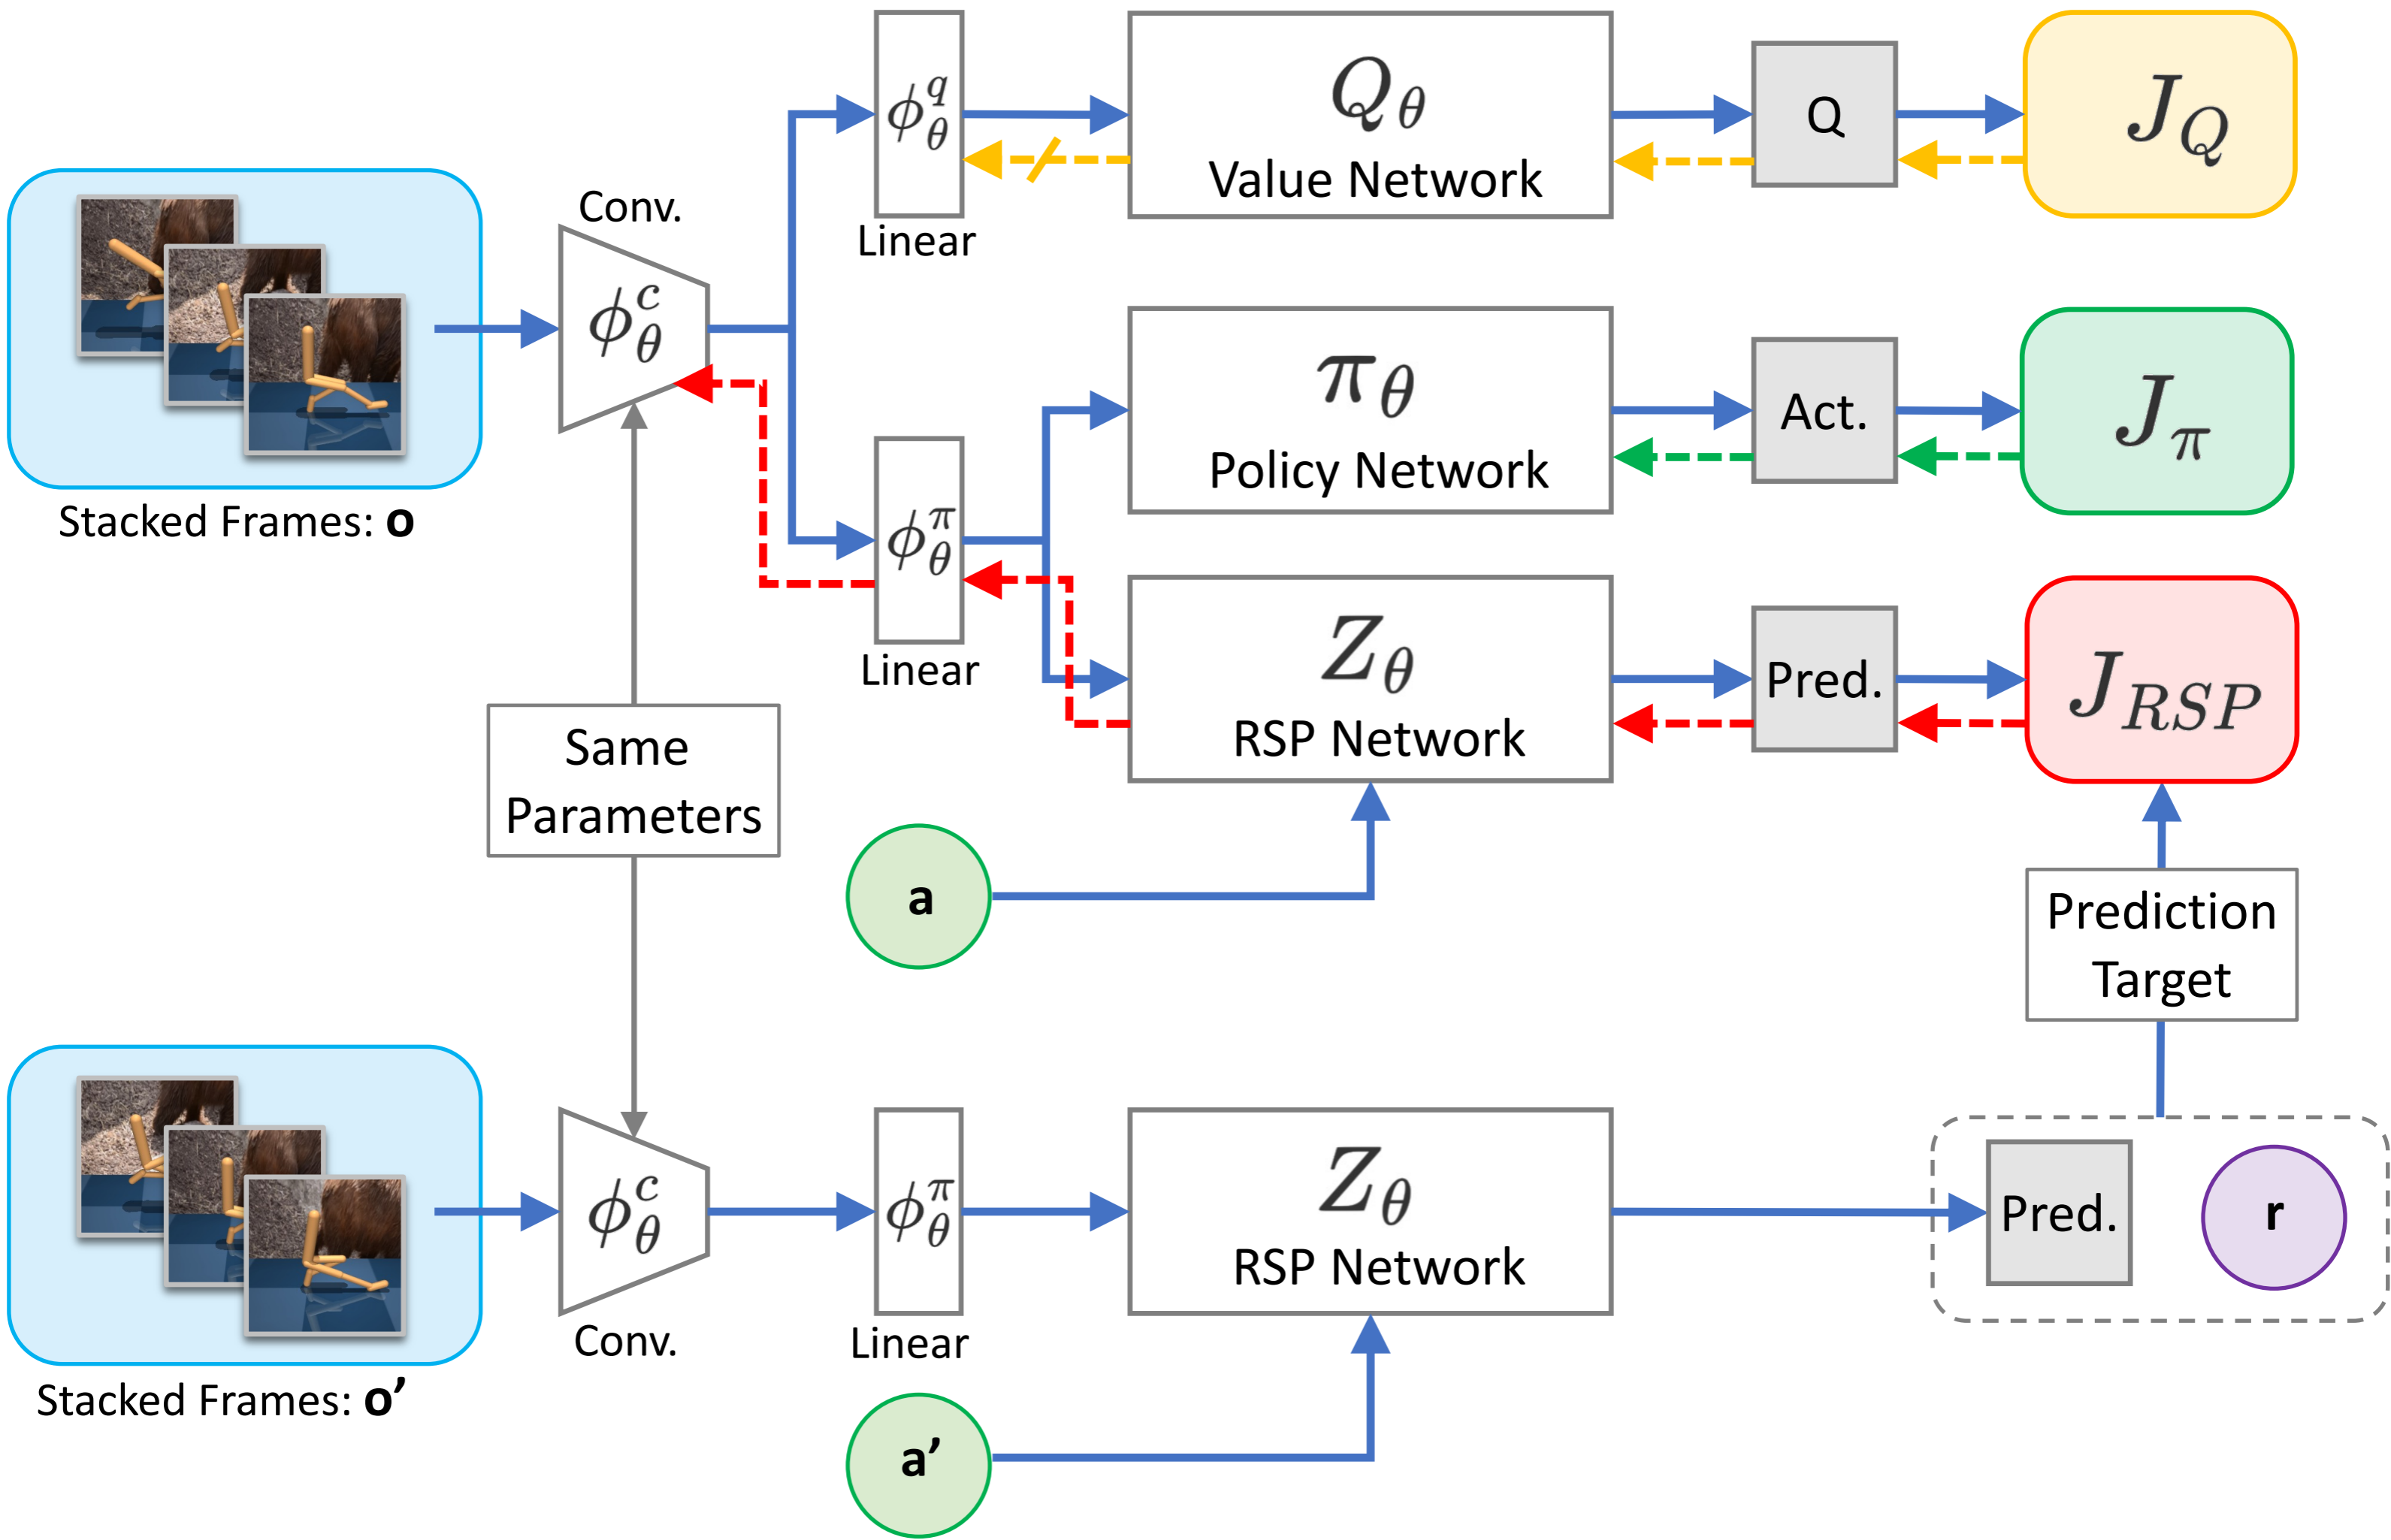

Supplement: supplementary_material [file attachment]

# Cartpole Swingup

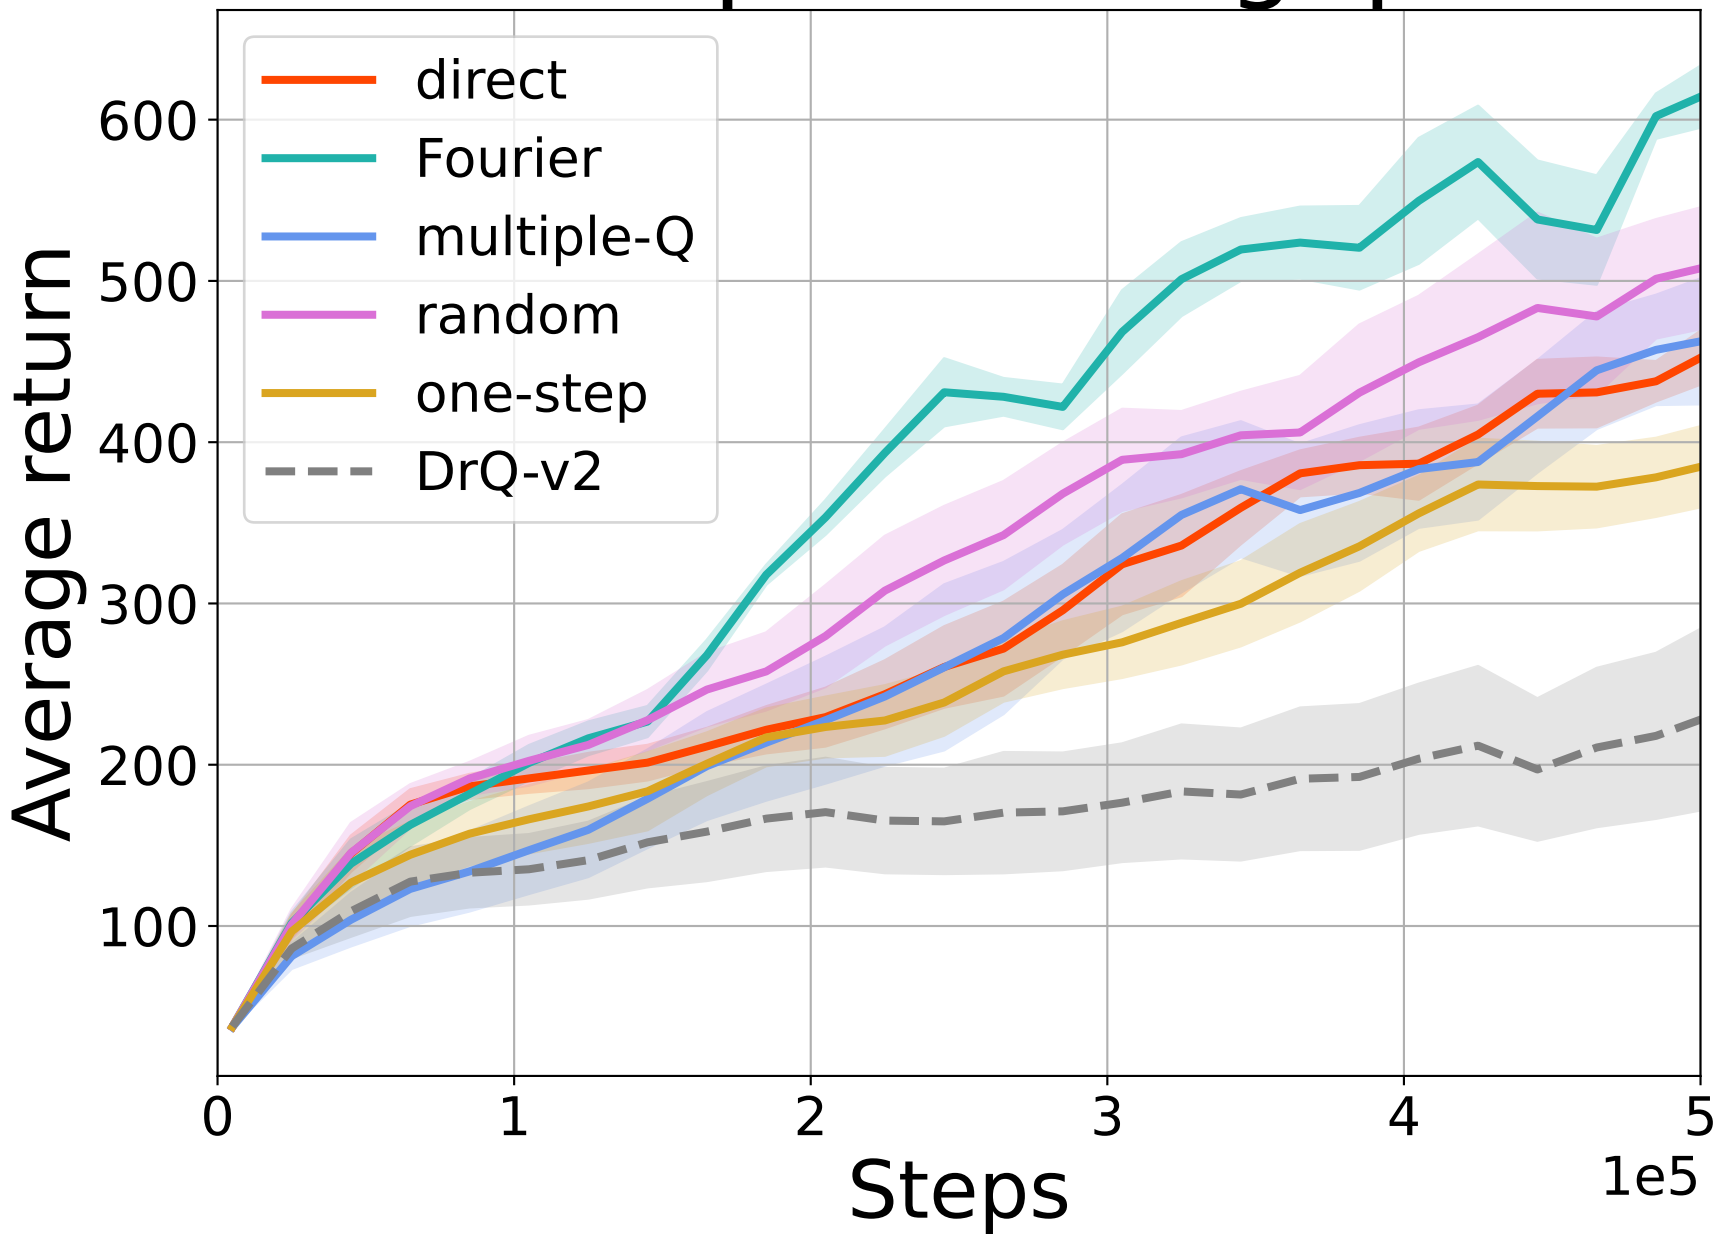

# Reacher Easy

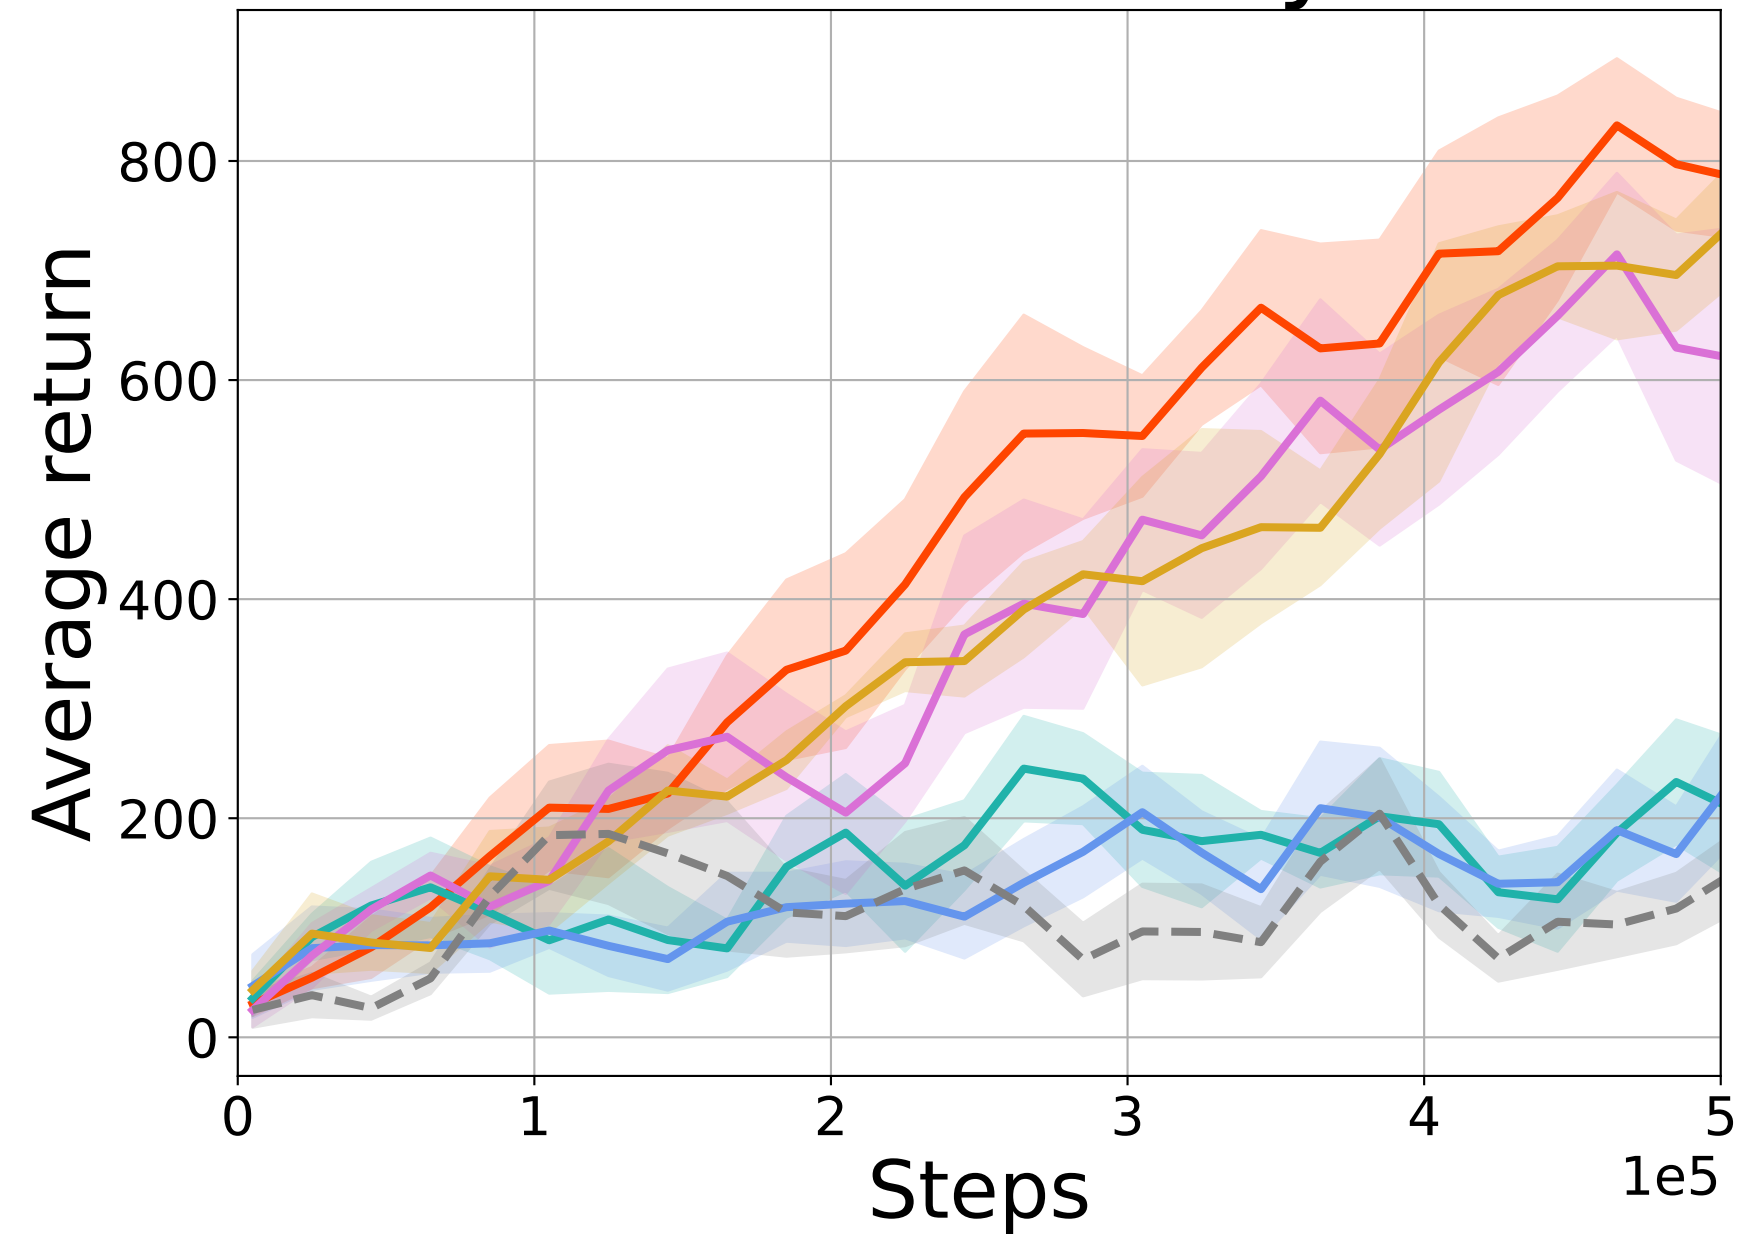

Supplement: supplementary_material [file attachment]

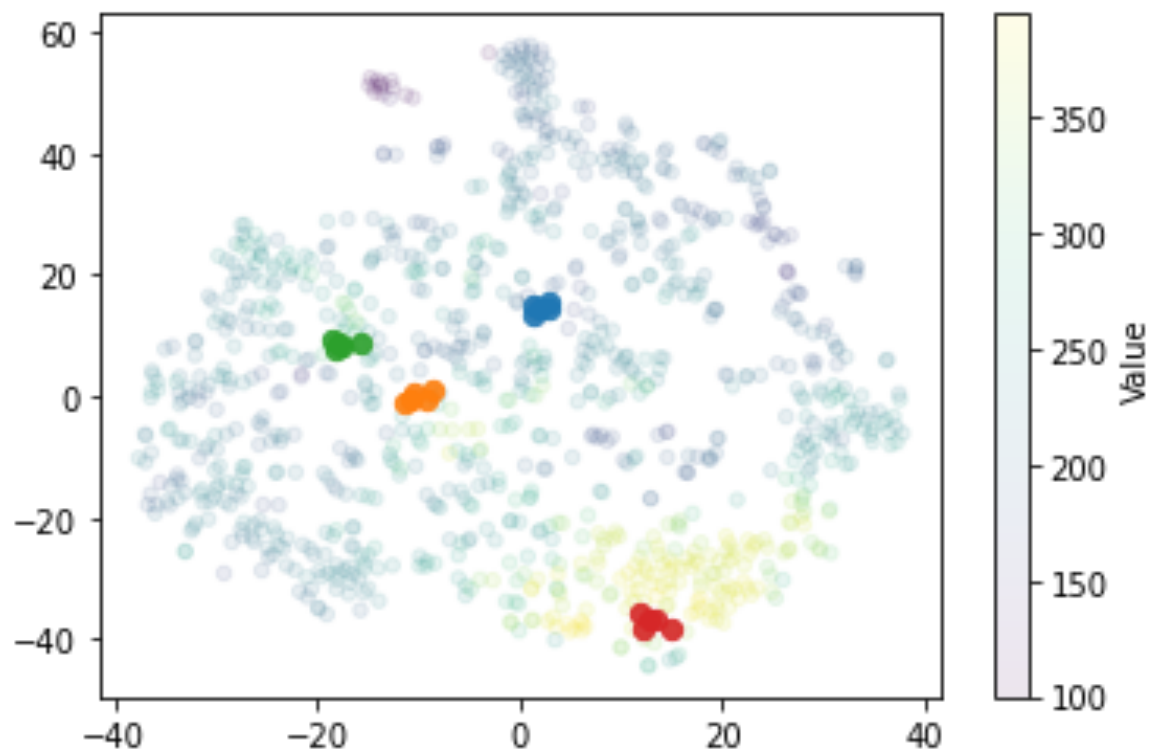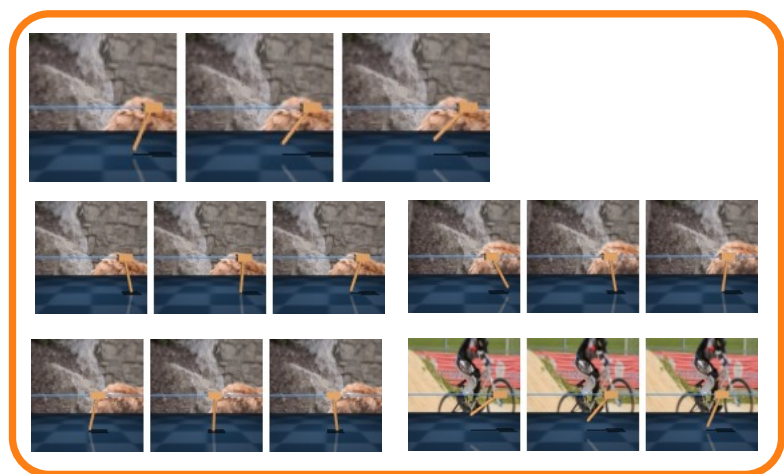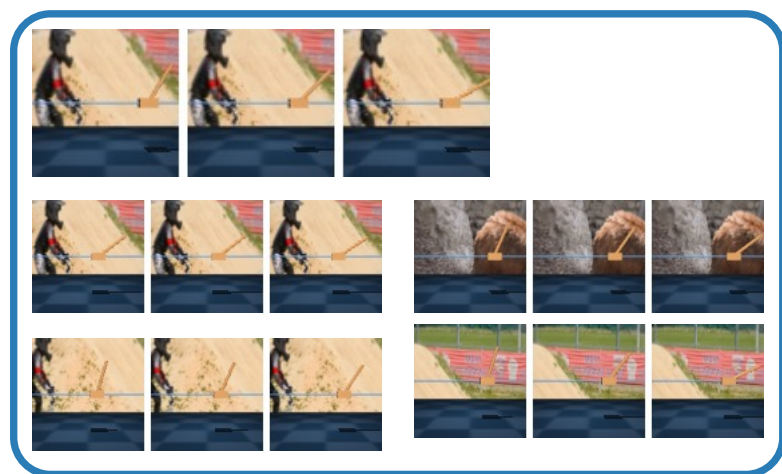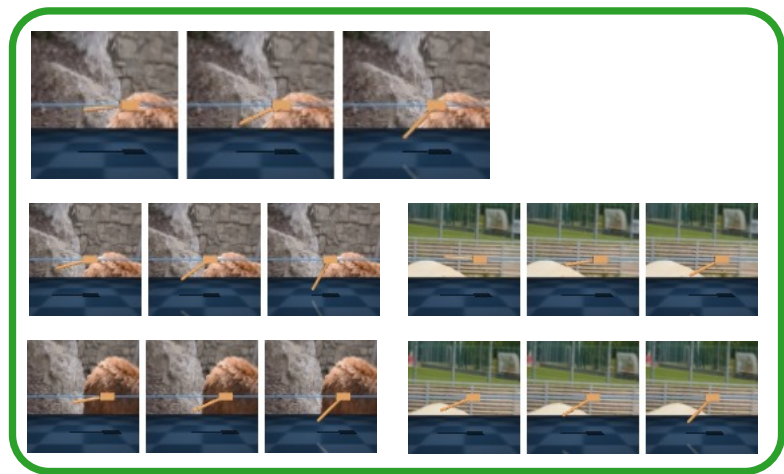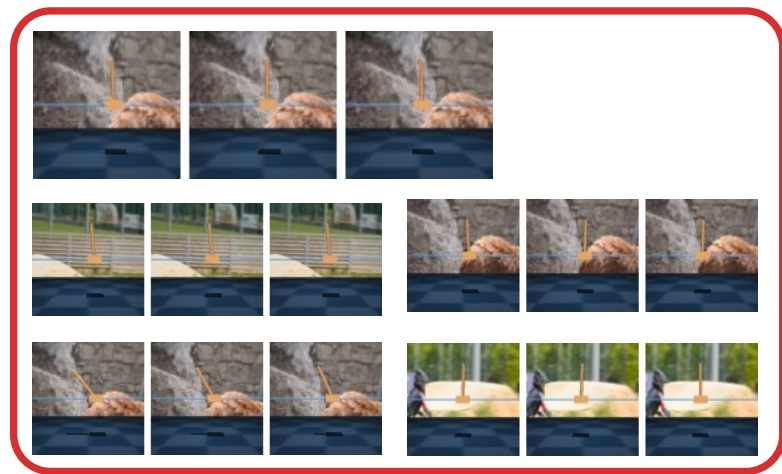

Supplement: supplementary_material [file attachment]

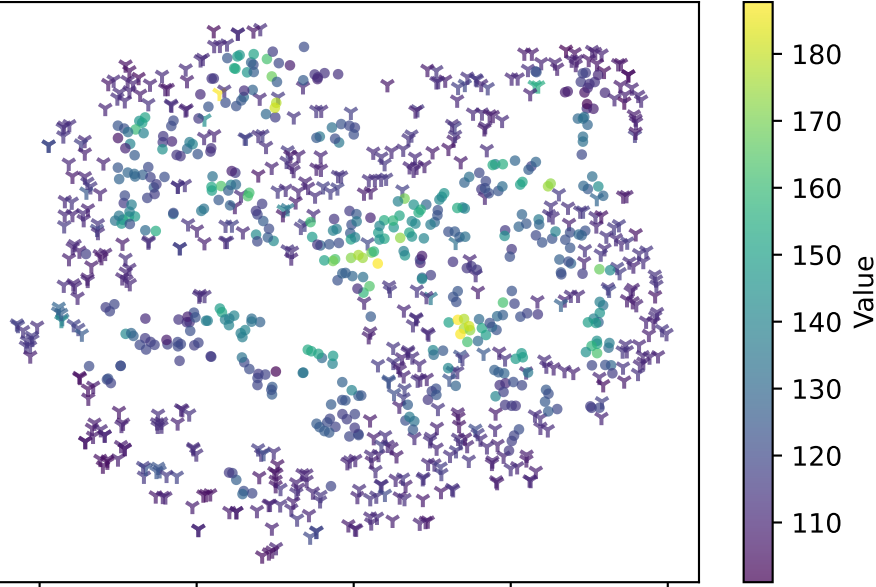

Supplement: supplementary_material [file attachment]

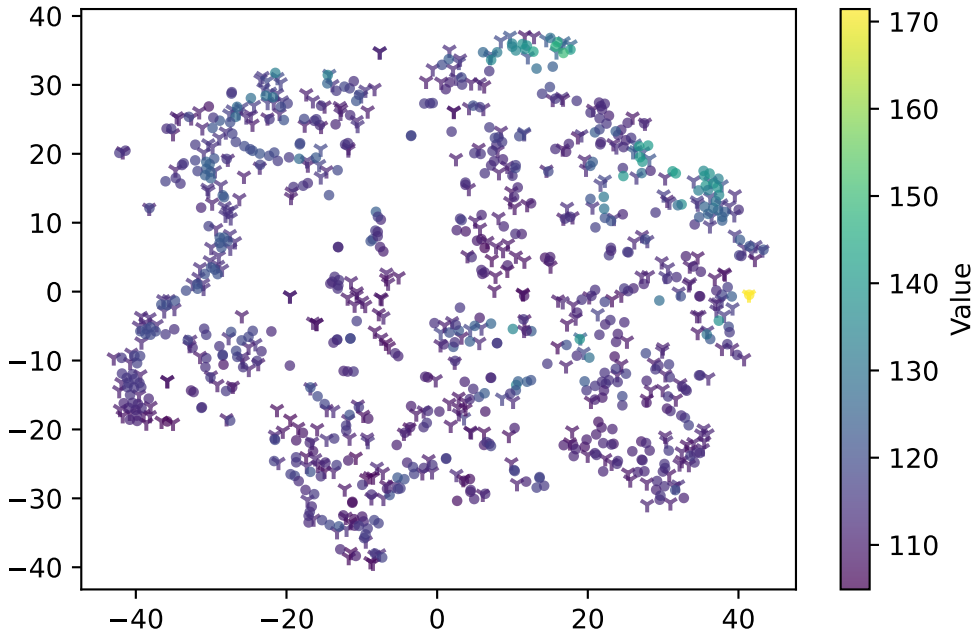

Supplement: supplementary_material [file attachment]

# Cartpole Swingup

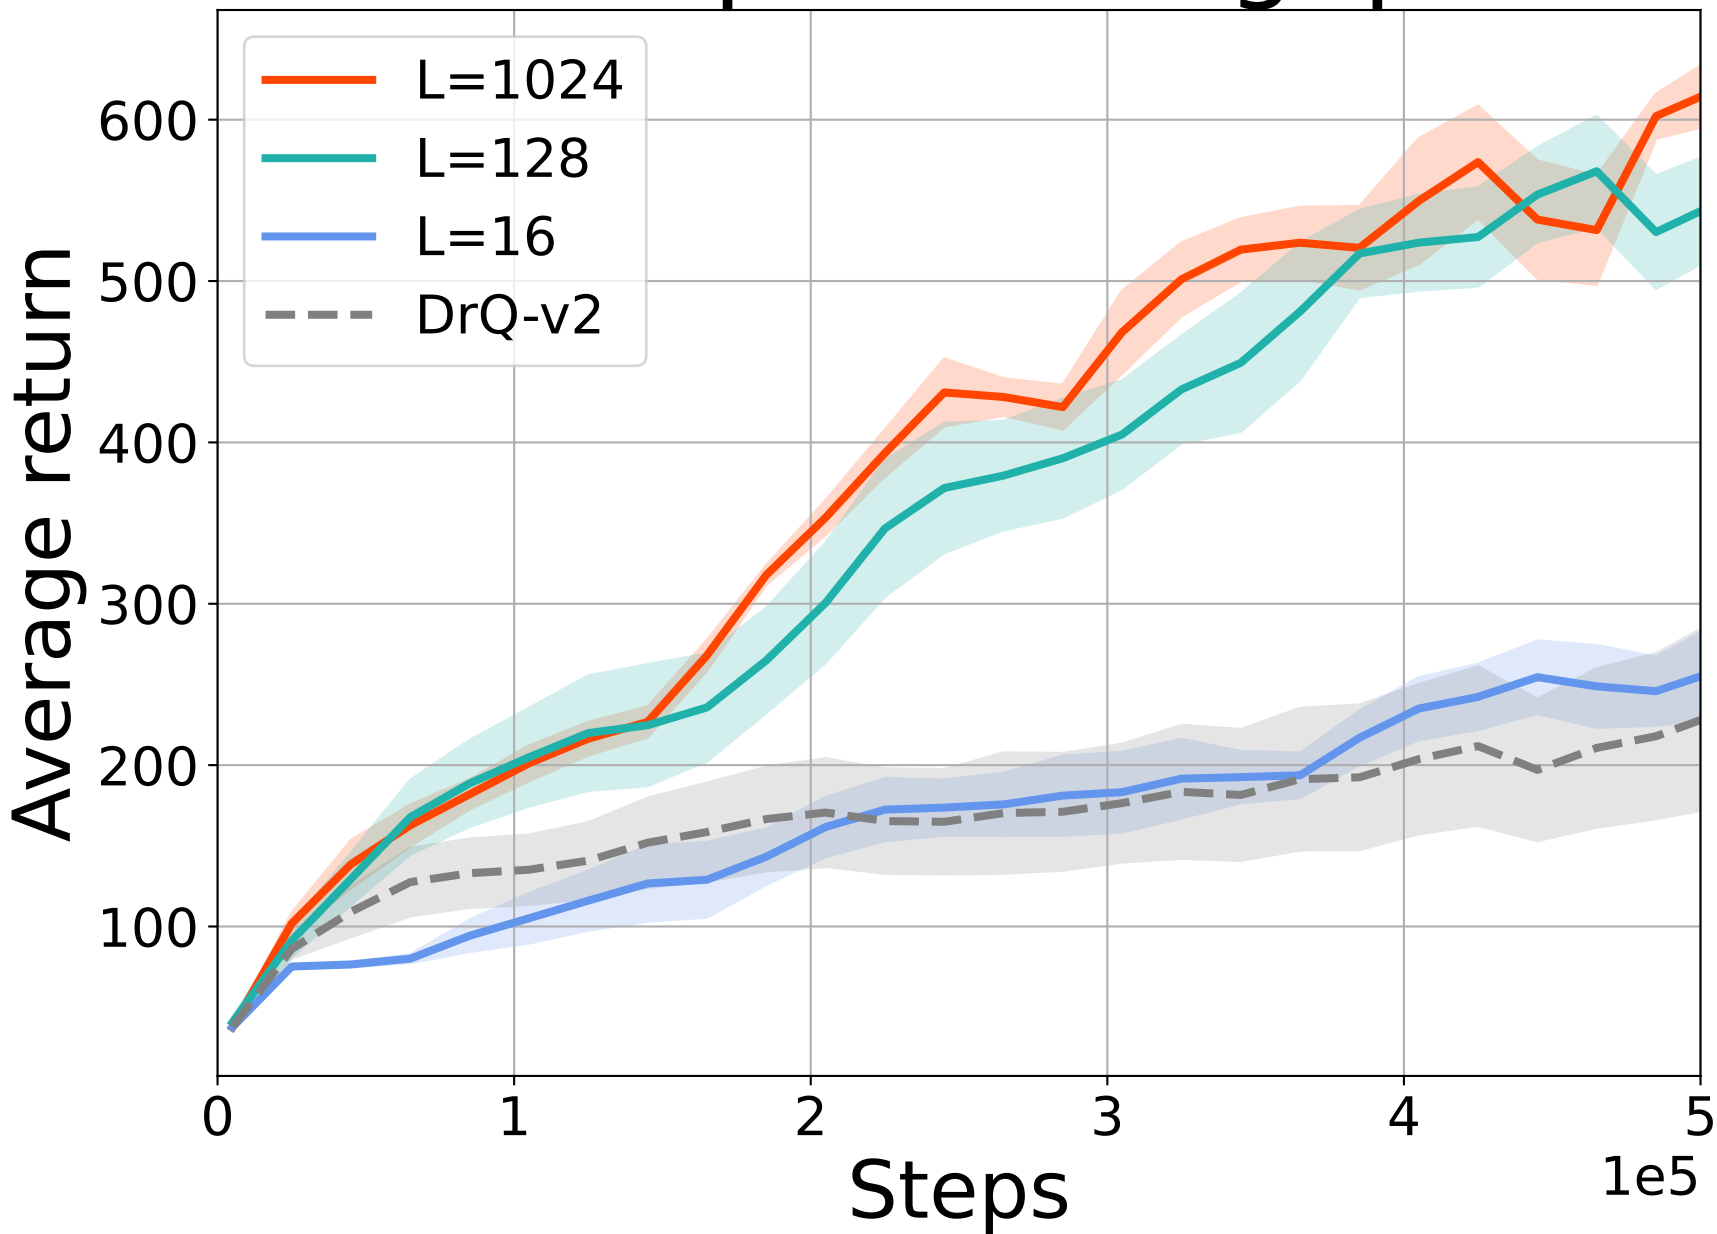

# Reacher Easy

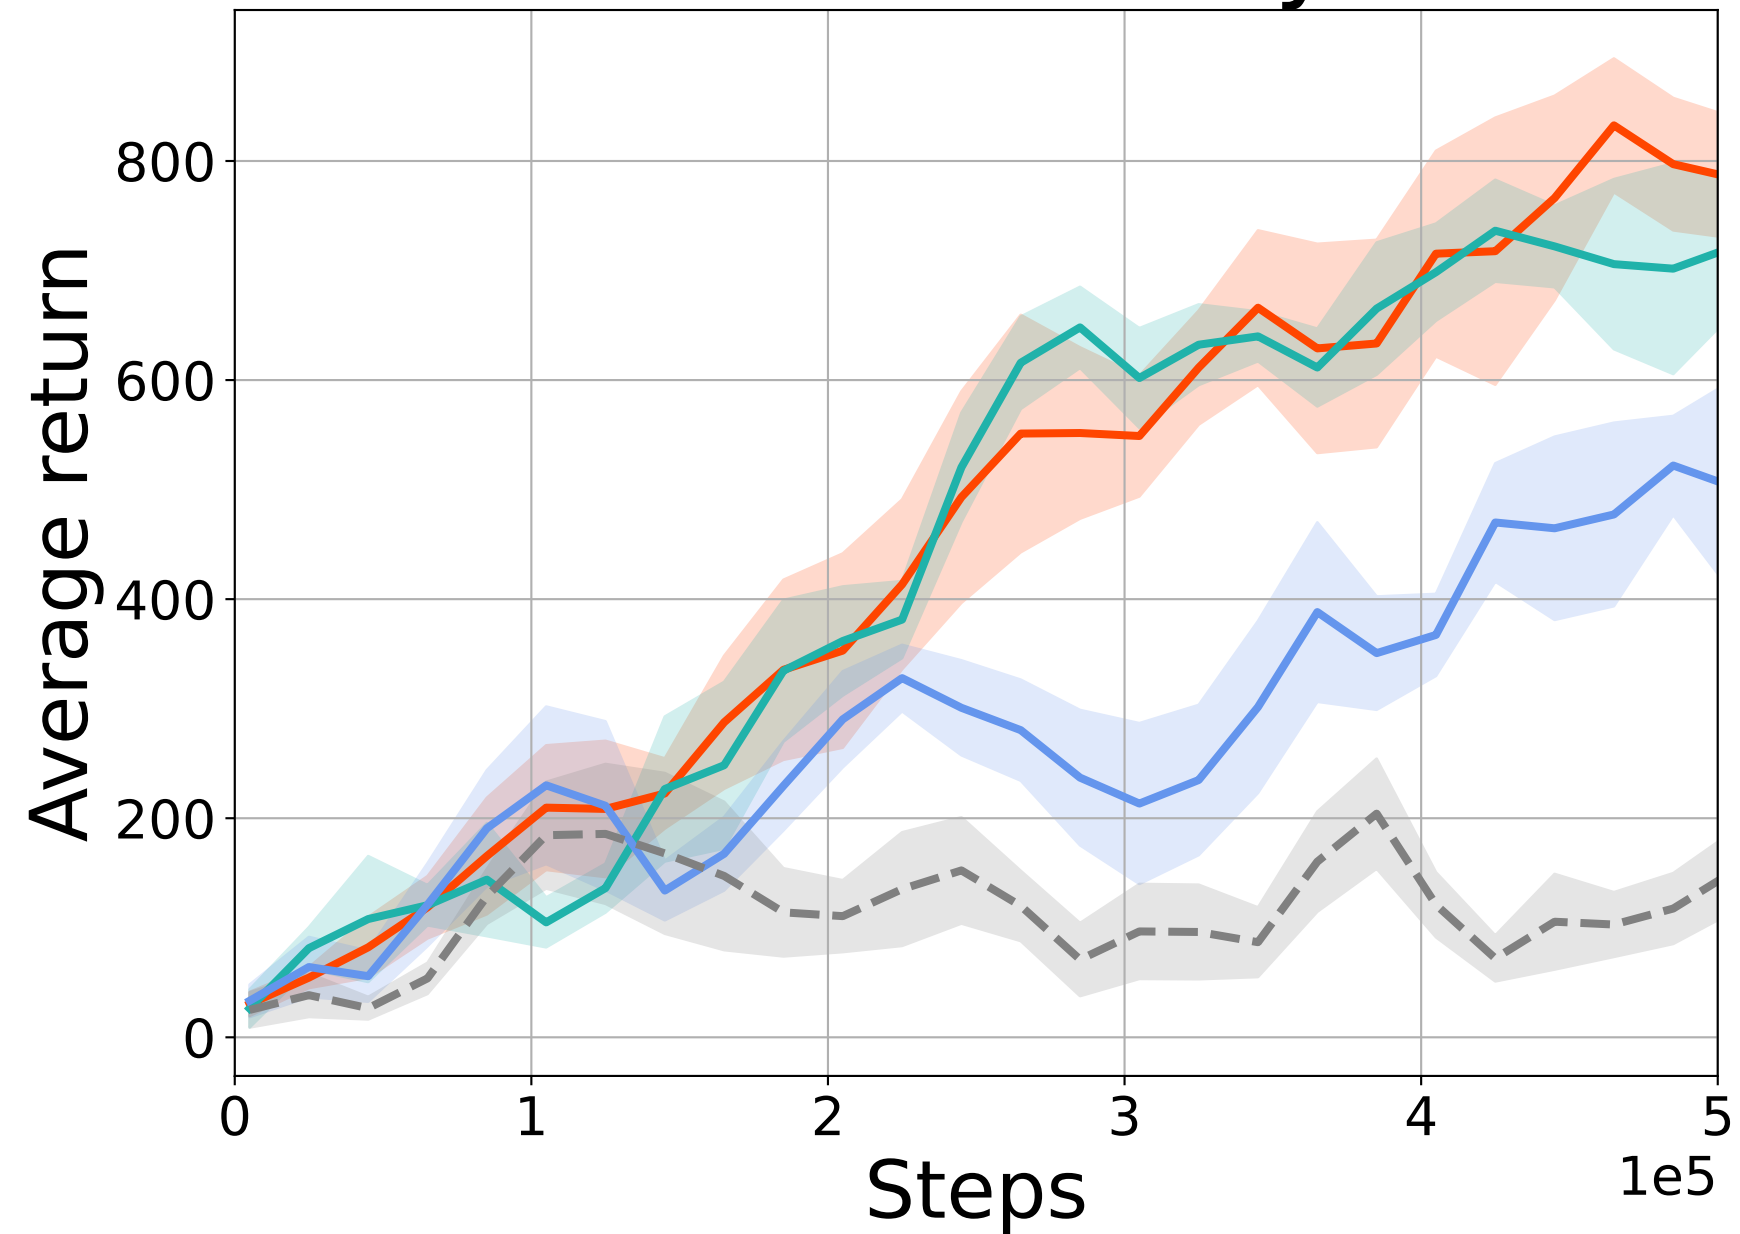

Supplement: supplementary_material [file attachment]

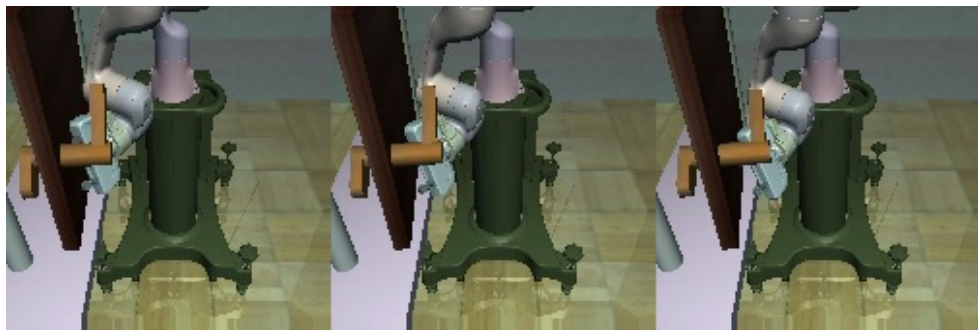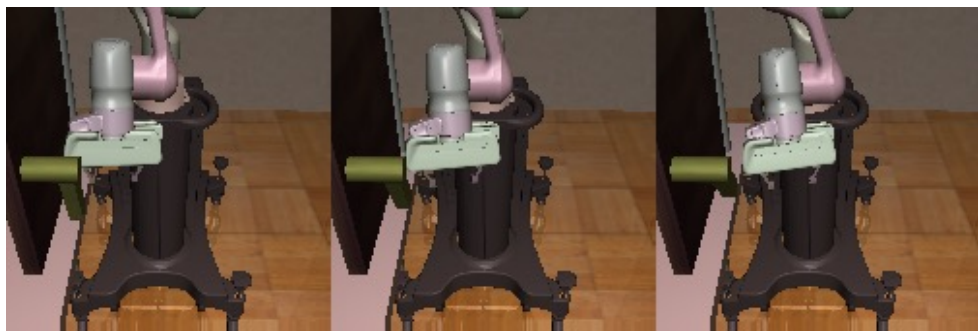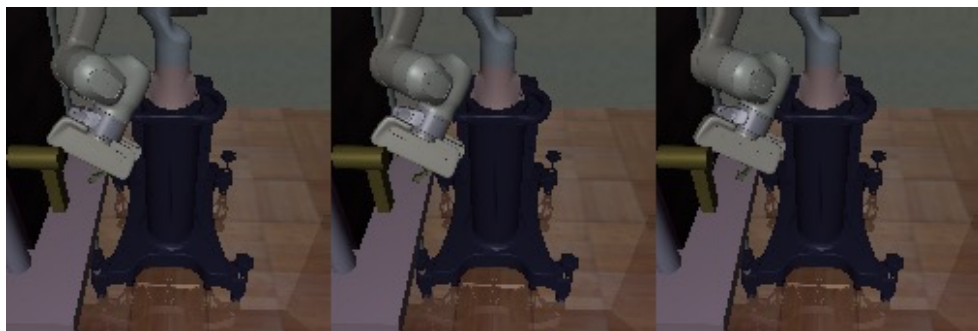

Supplement: supplementary_material [file attachment]

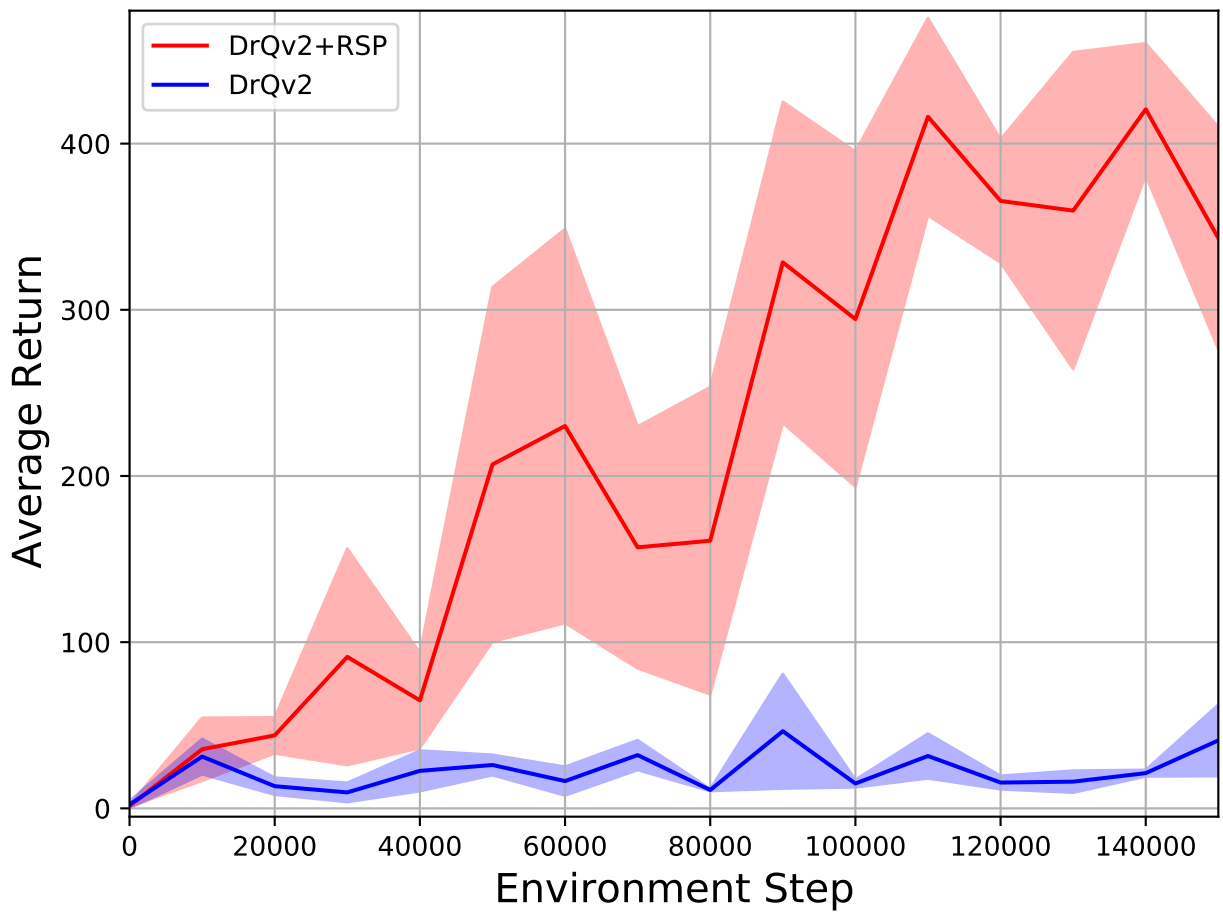

Supplement: supplementary_material [file attachment]

1

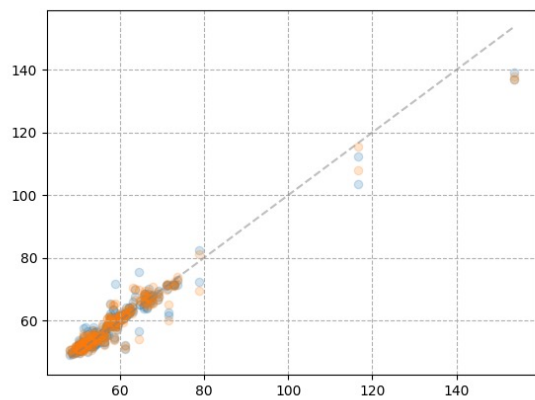

2

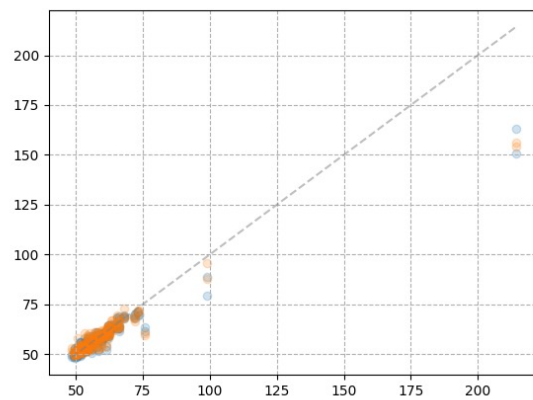

3

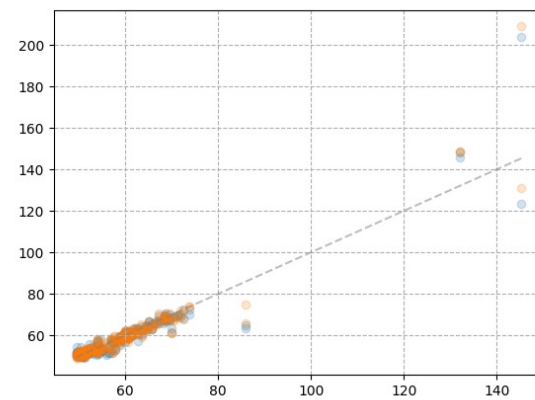

4

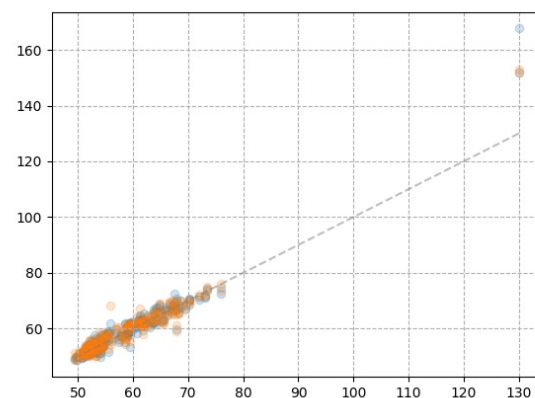

5

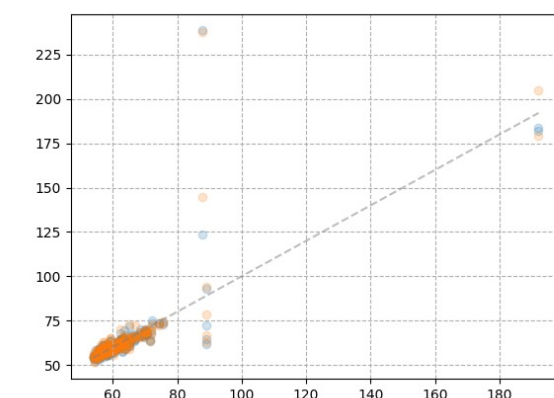

6

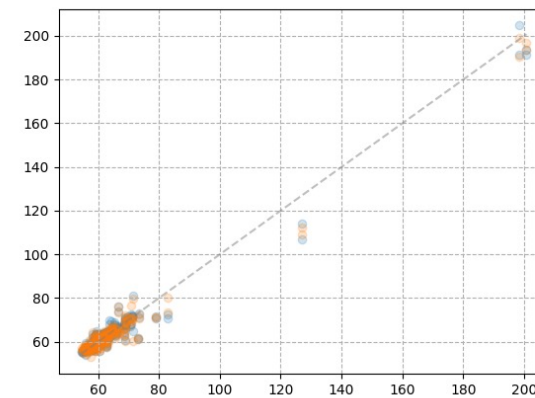

7

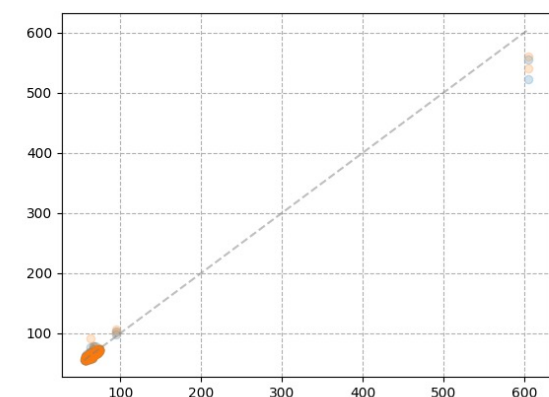

8

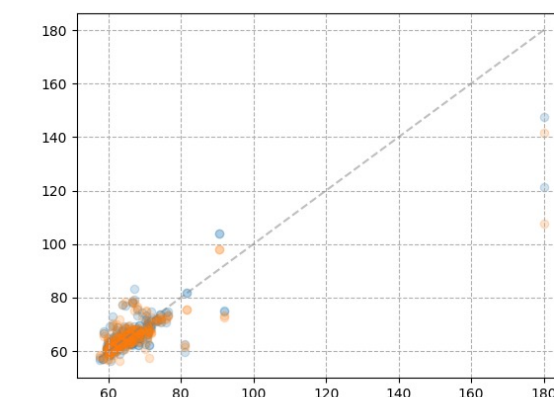

9

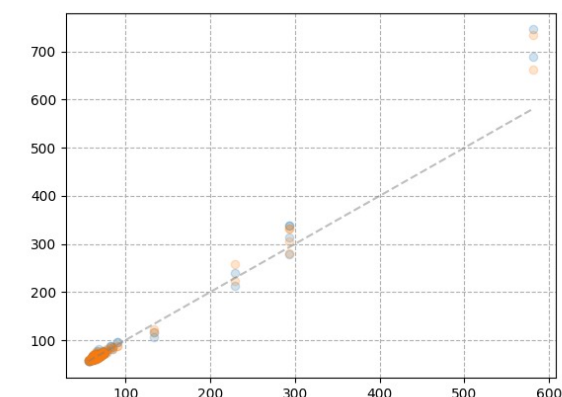

Max pred. Q

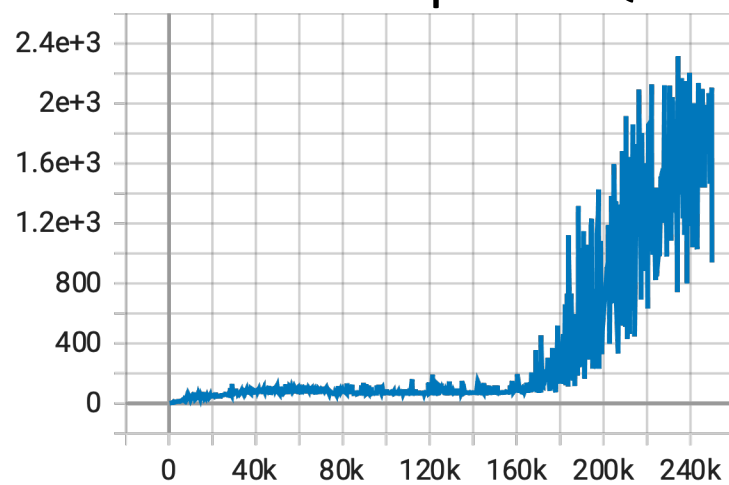

Q loss

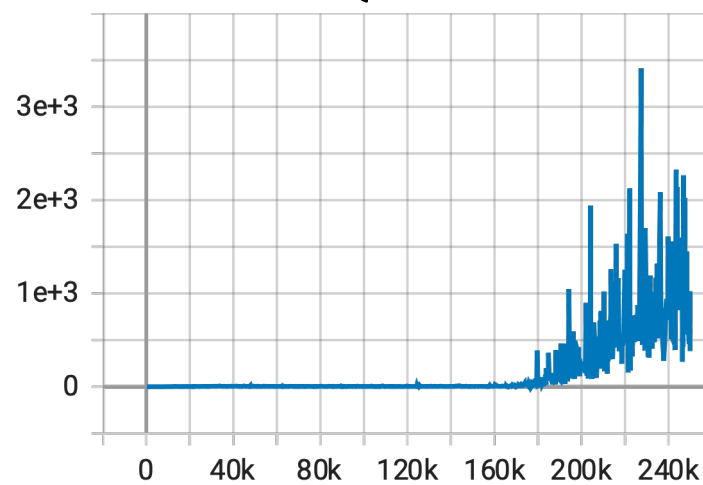

Critic gradient norm

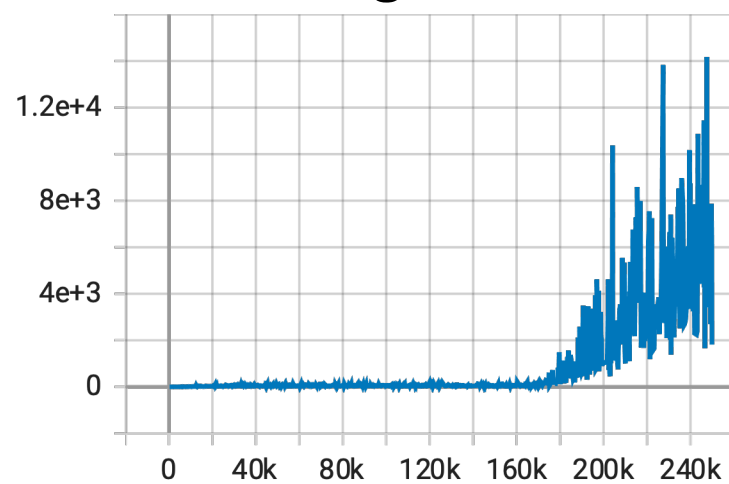

Average return

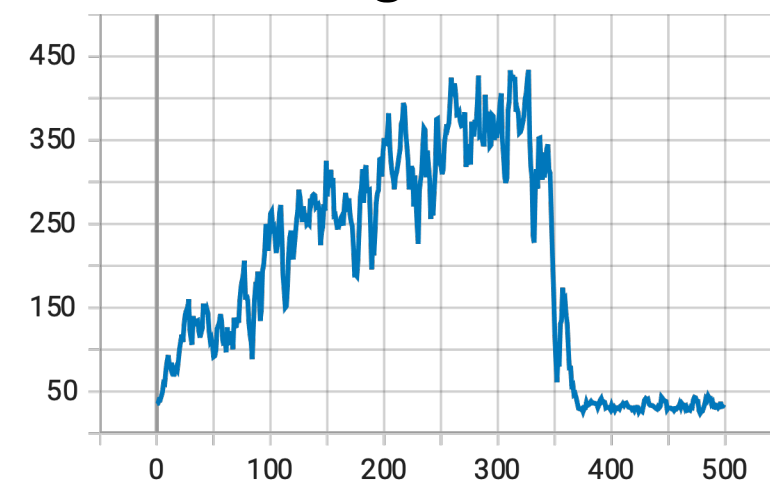

Supplement: supplementary_material [file attachment]

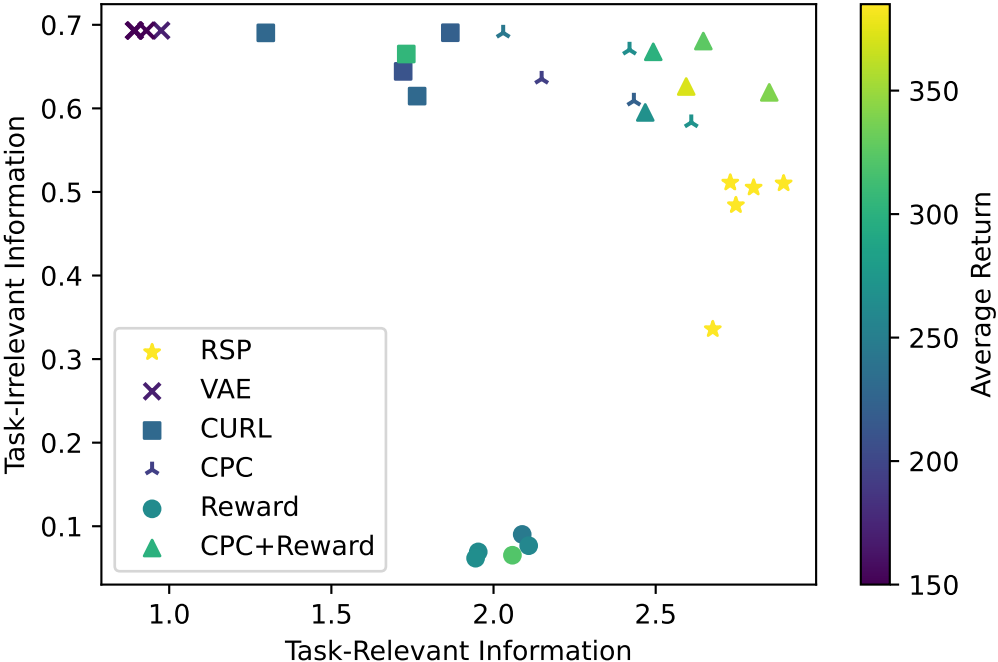

Supplement: supplementary_material [file attachment]

# State

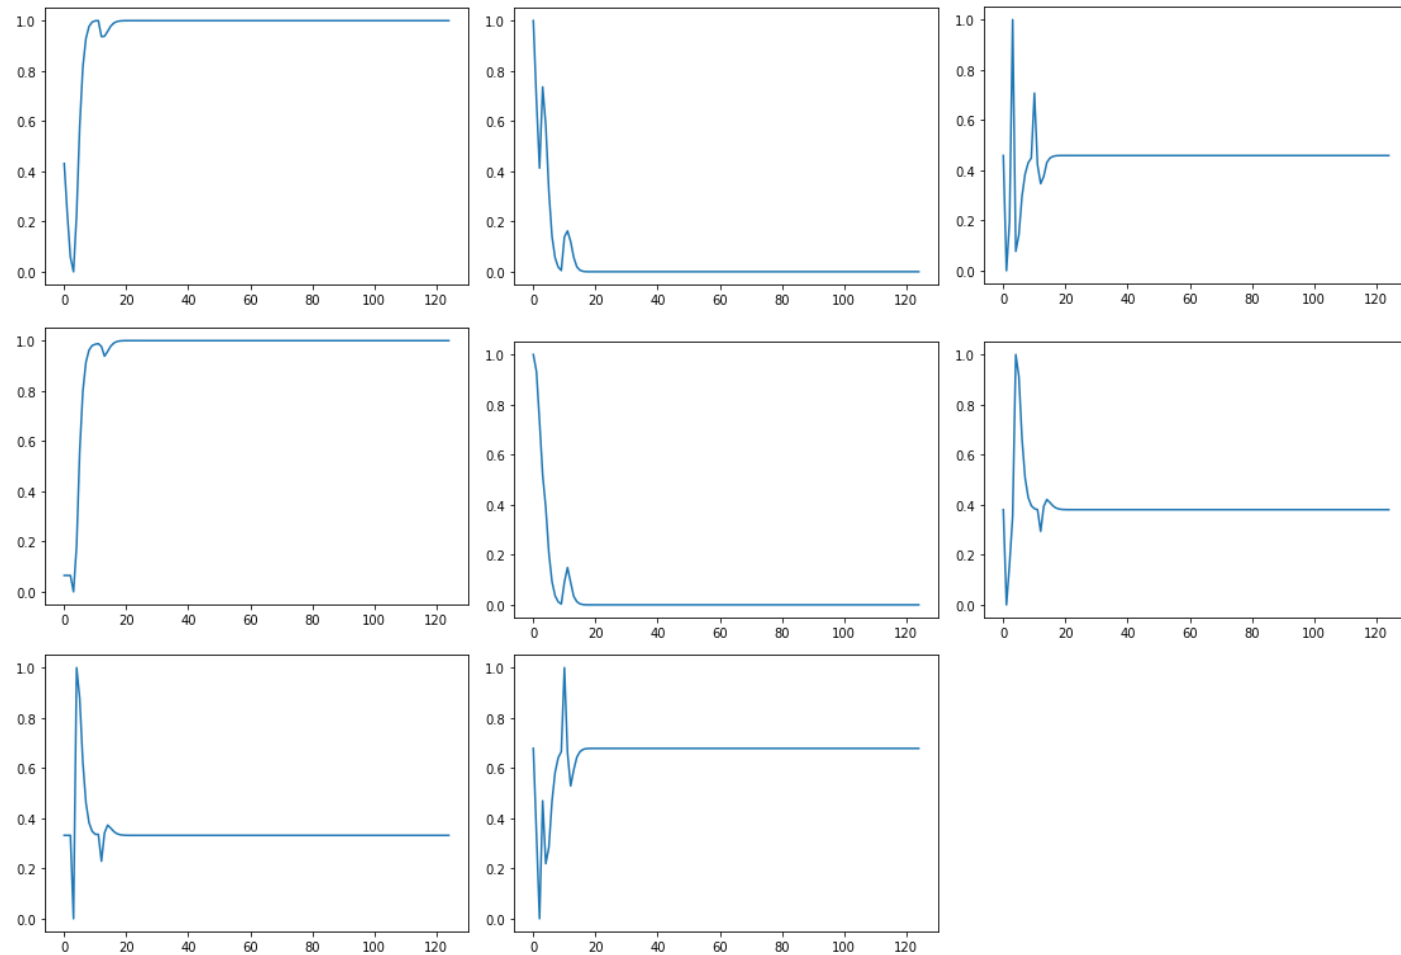

# Reward

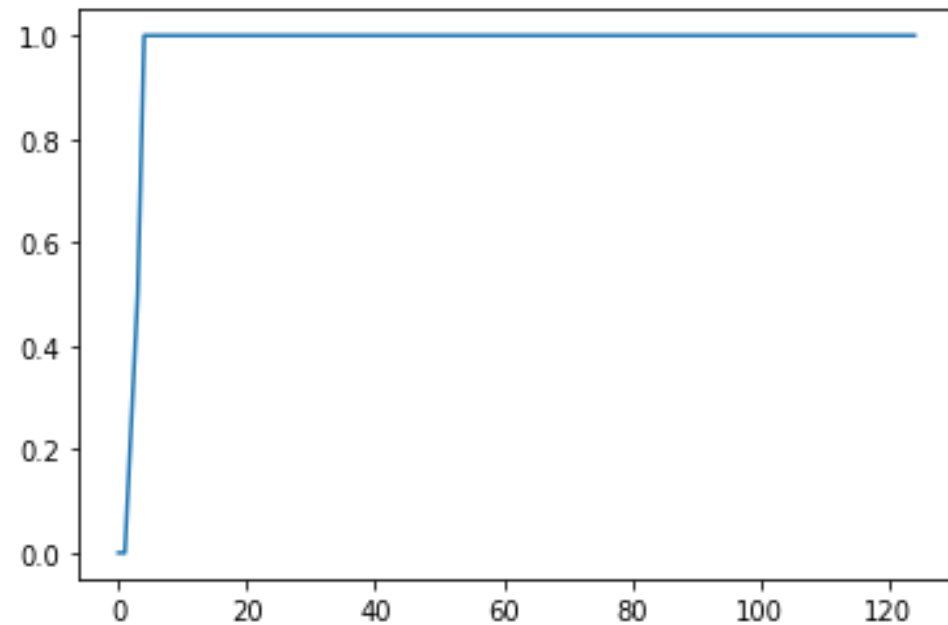

Supplement: supplementary_material [file attachment]

# Cartpole Swingup

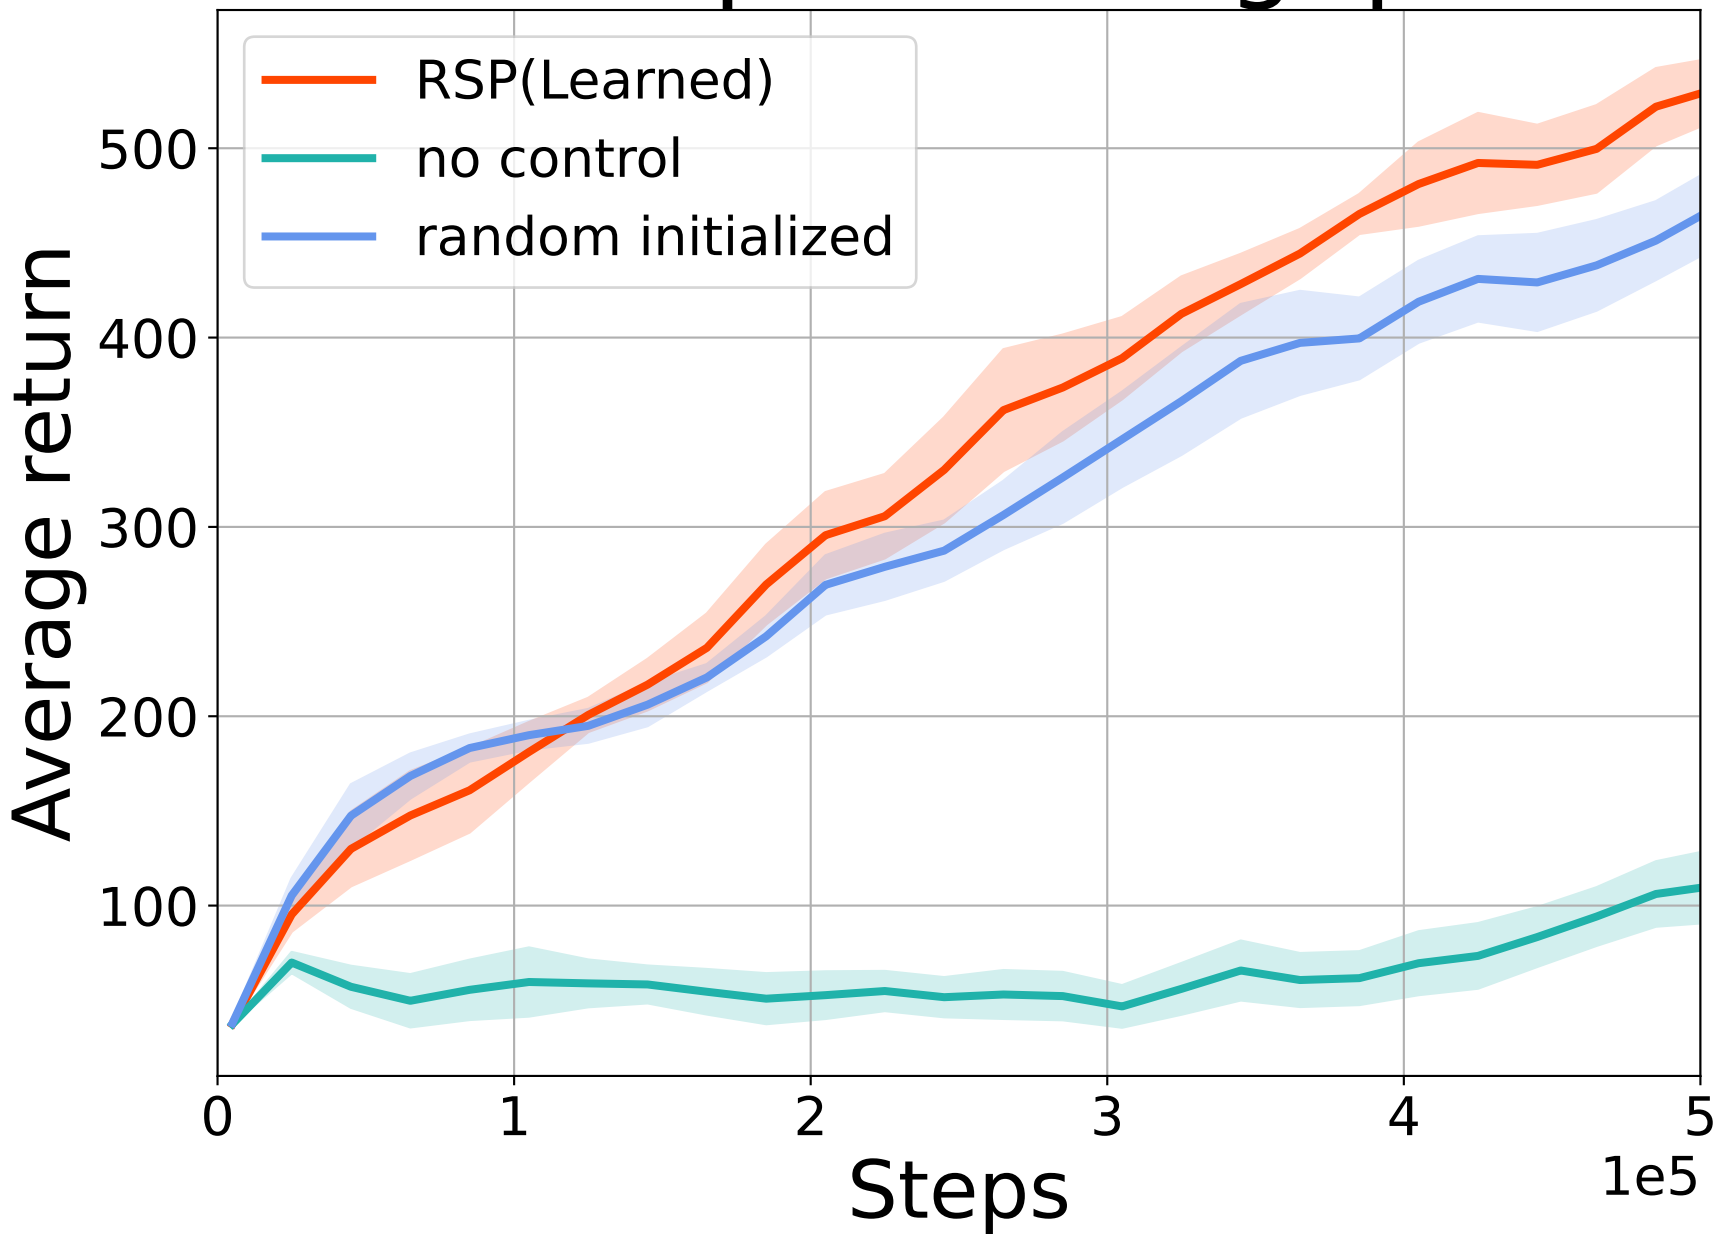

# Reacher Easy

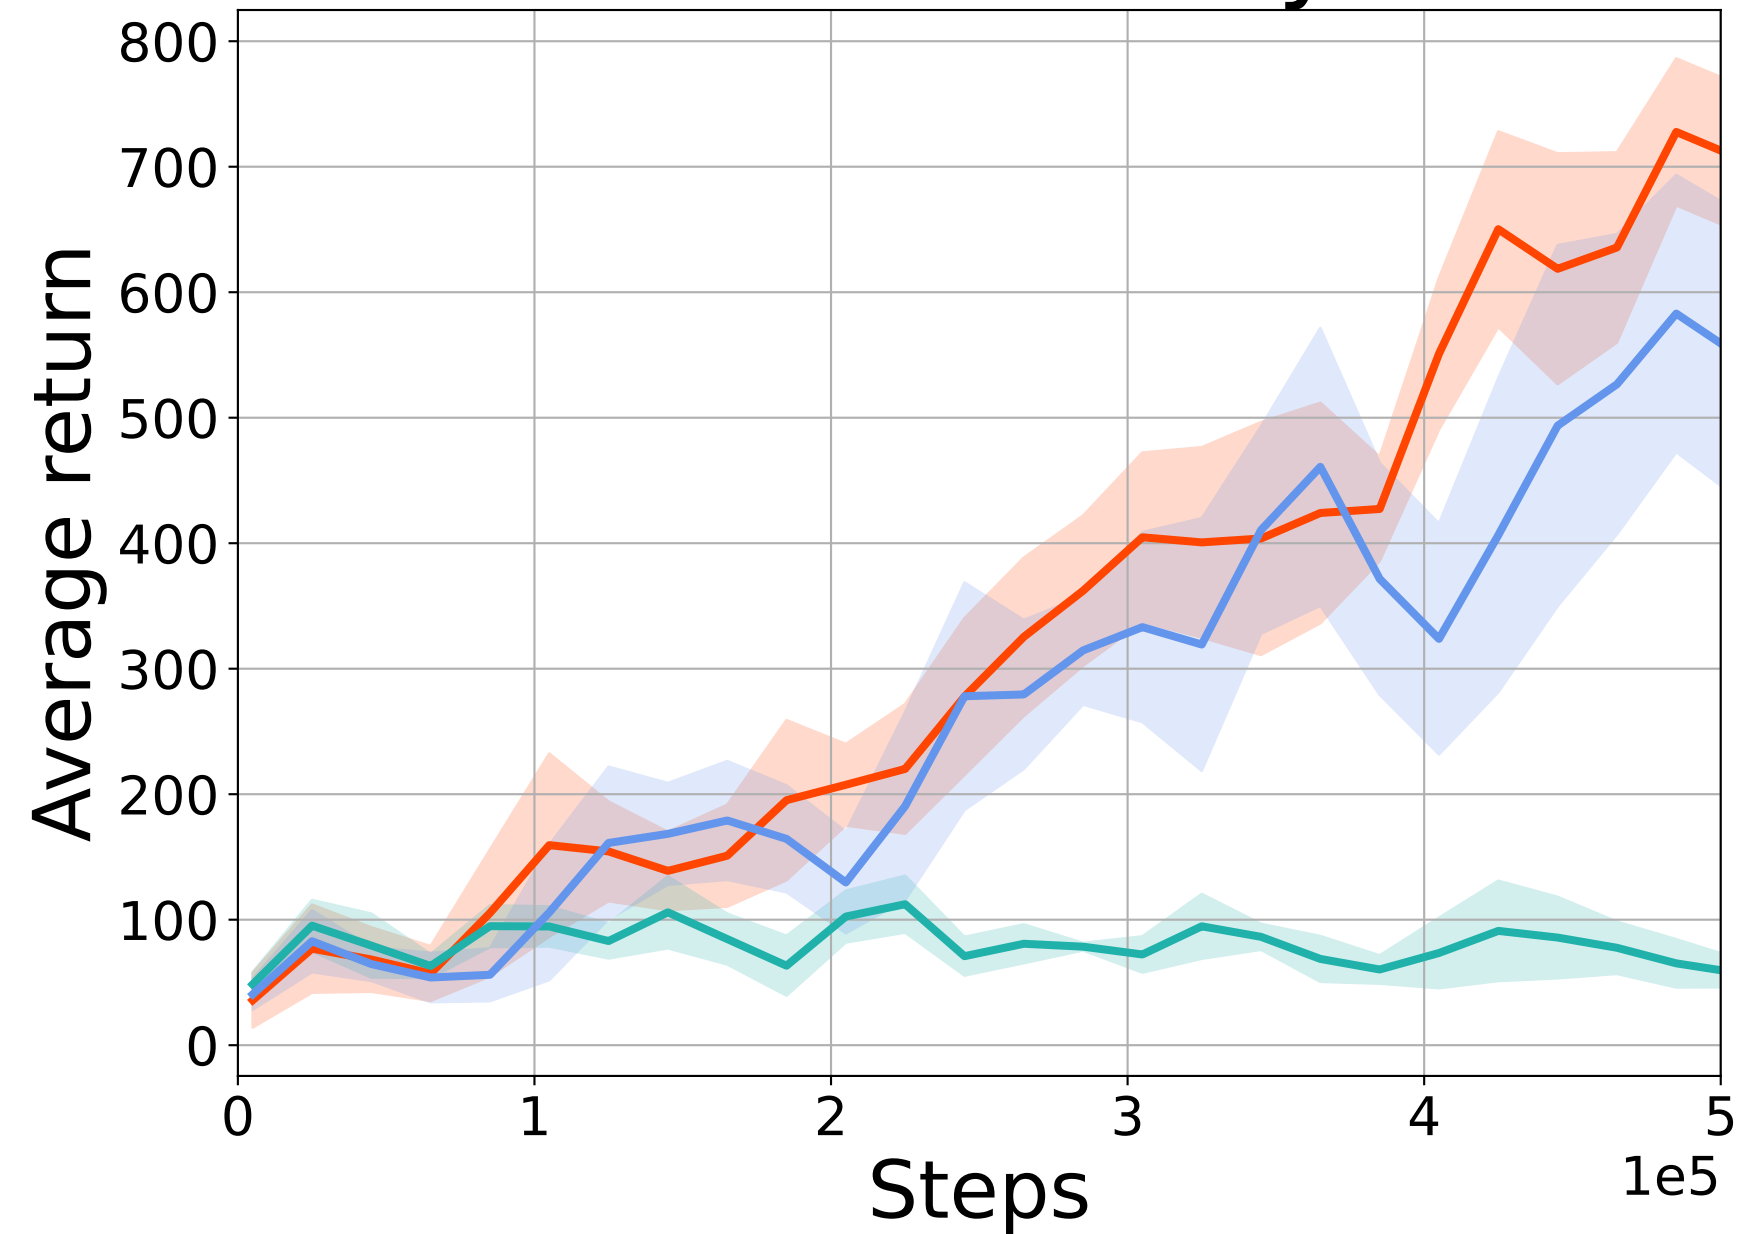

Supplement: supplementary_material [file attachment]

### Ball in Cup Catch

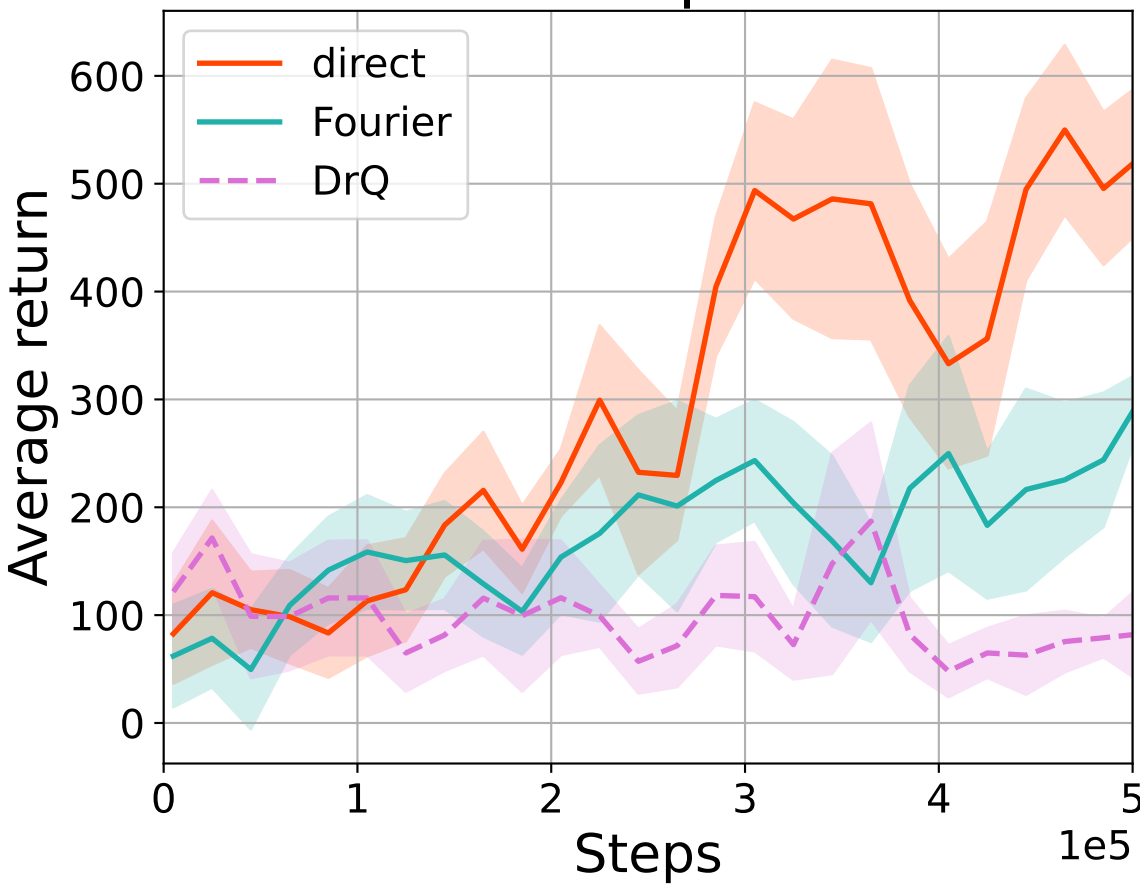

### Reacher Easy

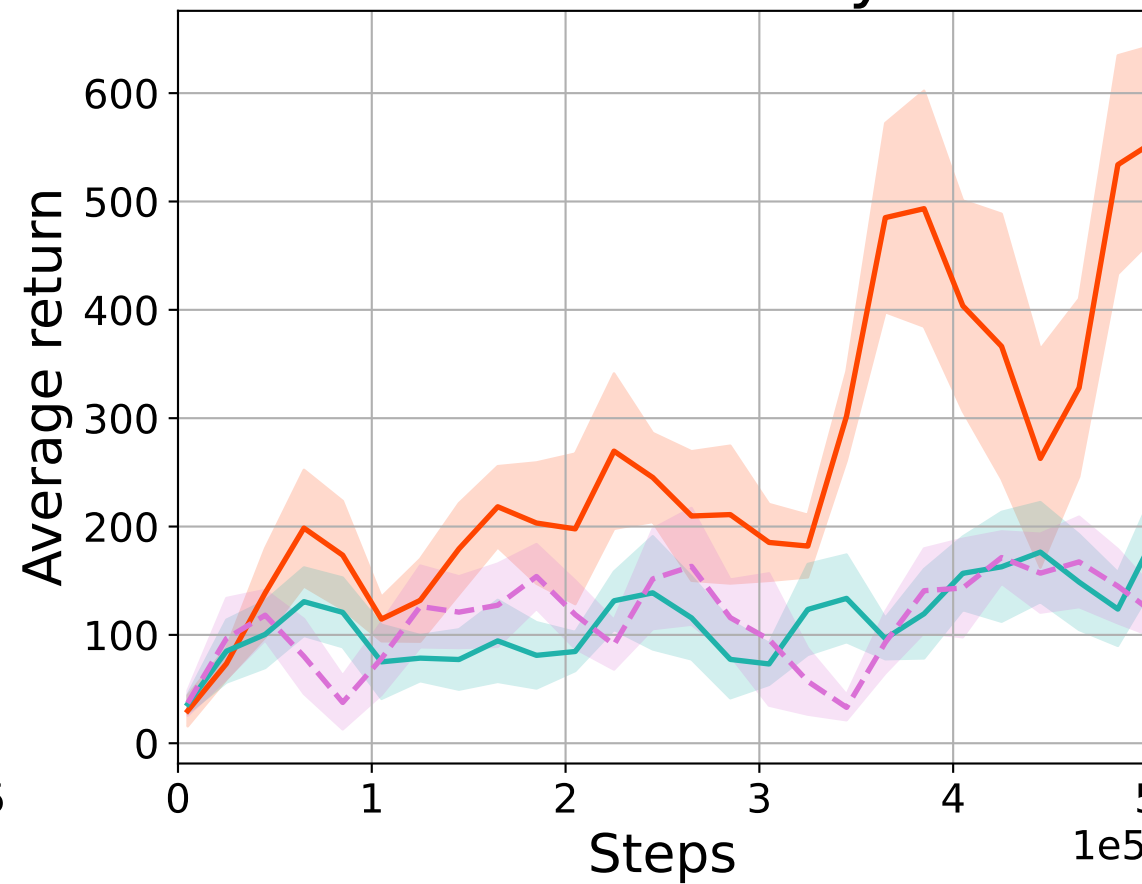

### Walker Walk

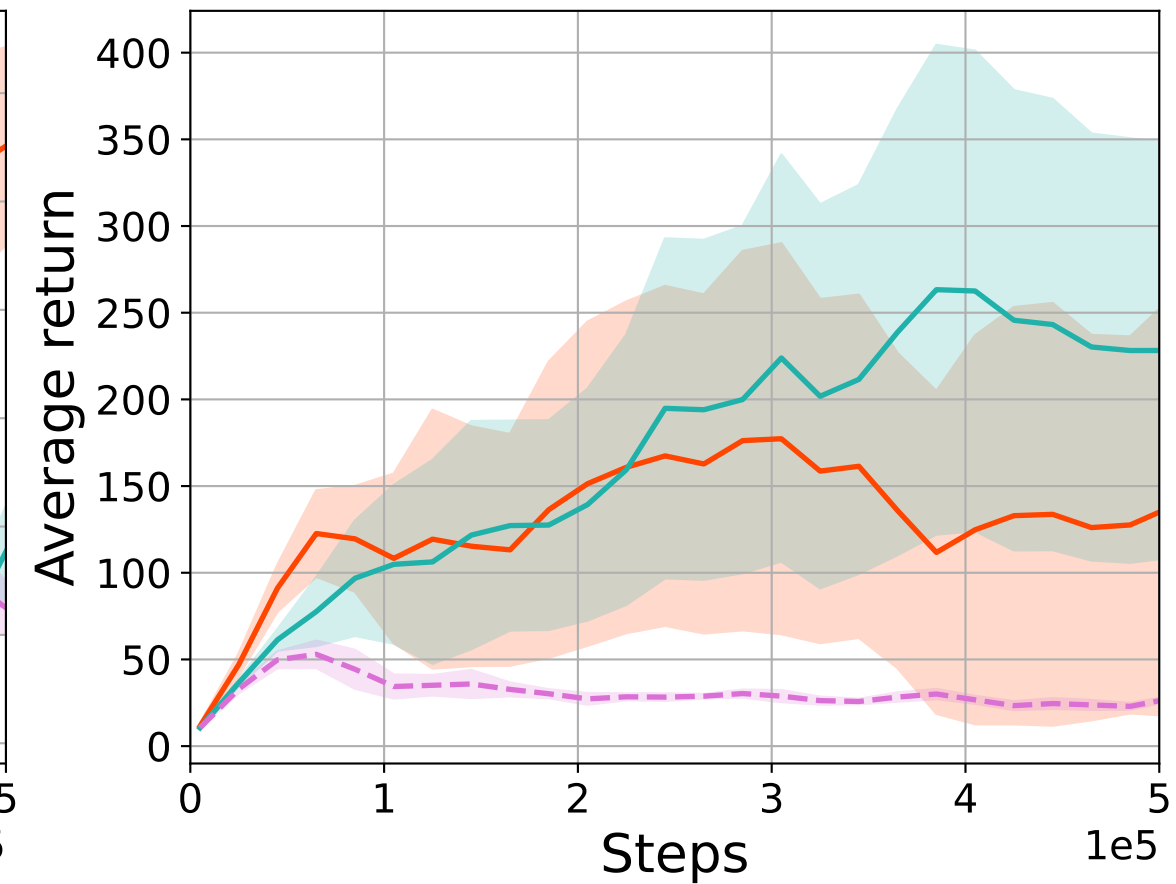

### Cartpole Swingup

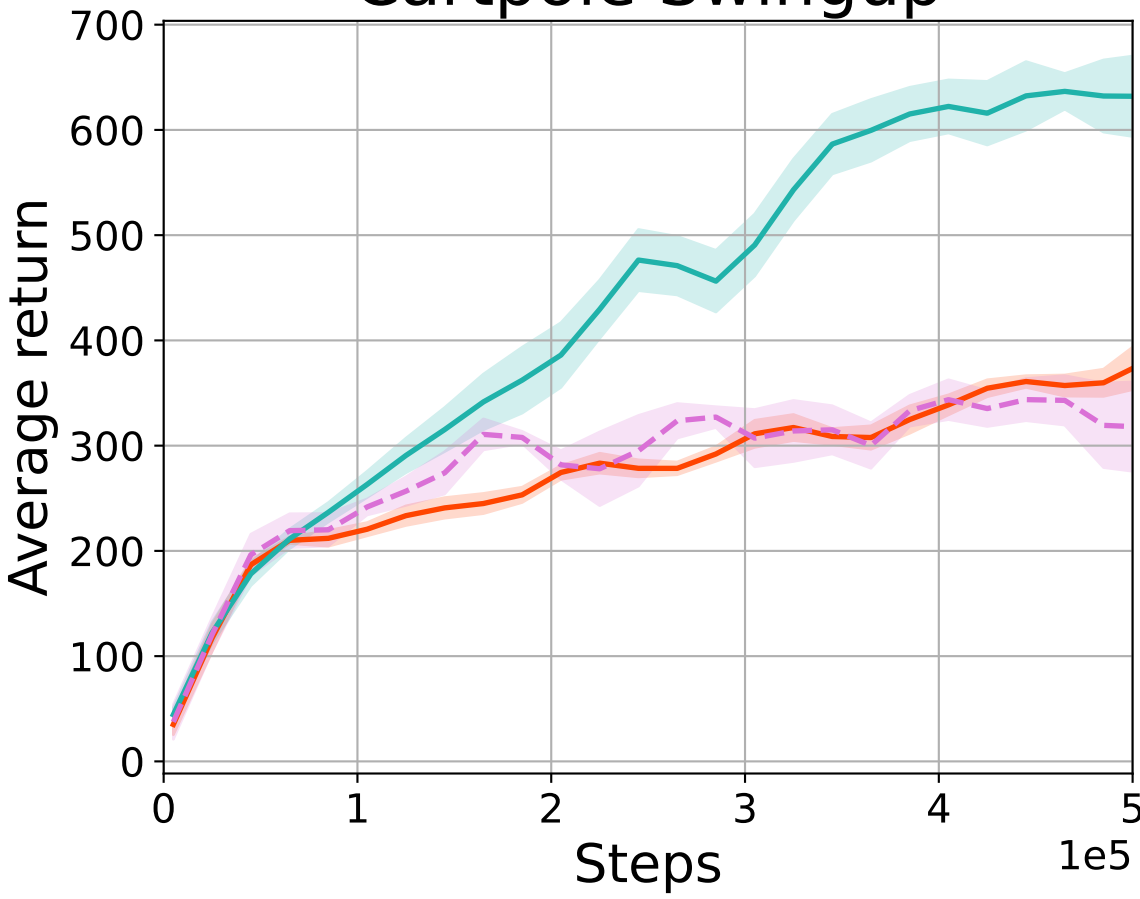

### Finger Spin

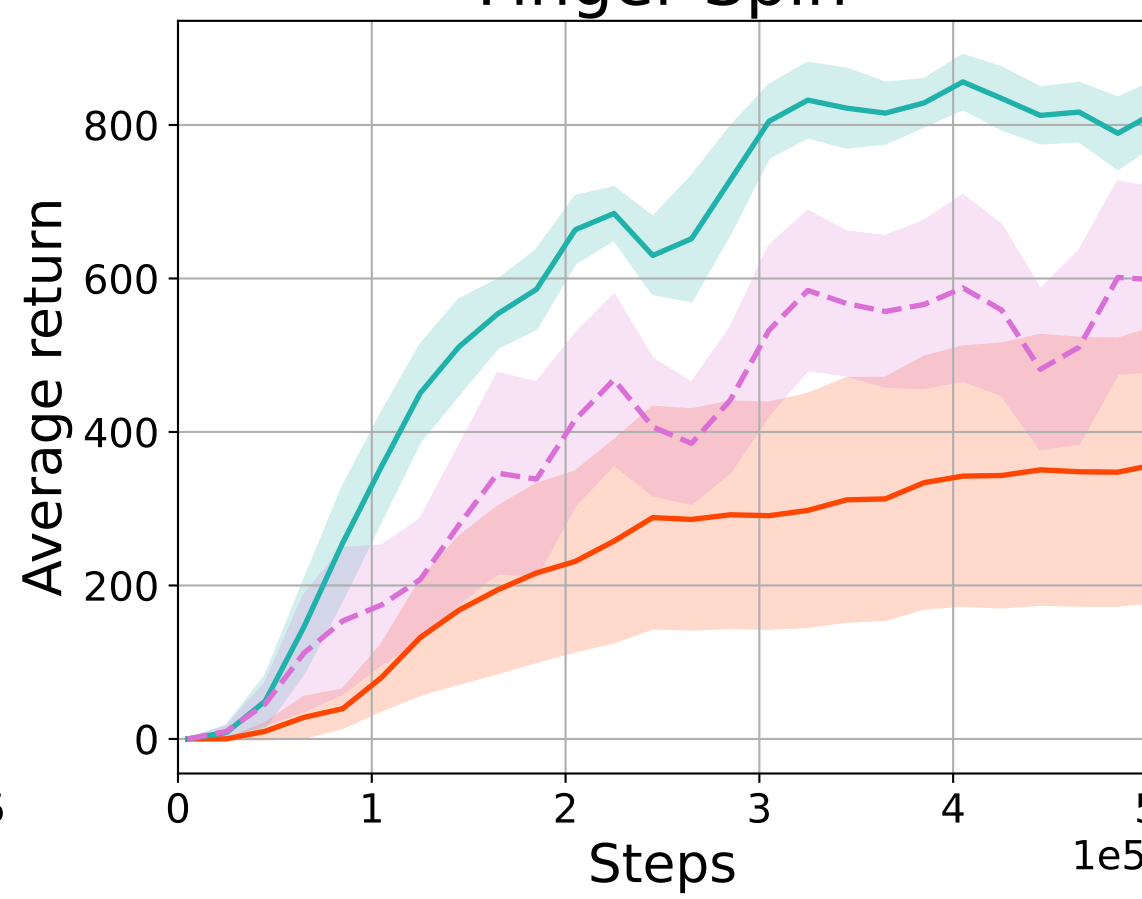

### Cheetah Run

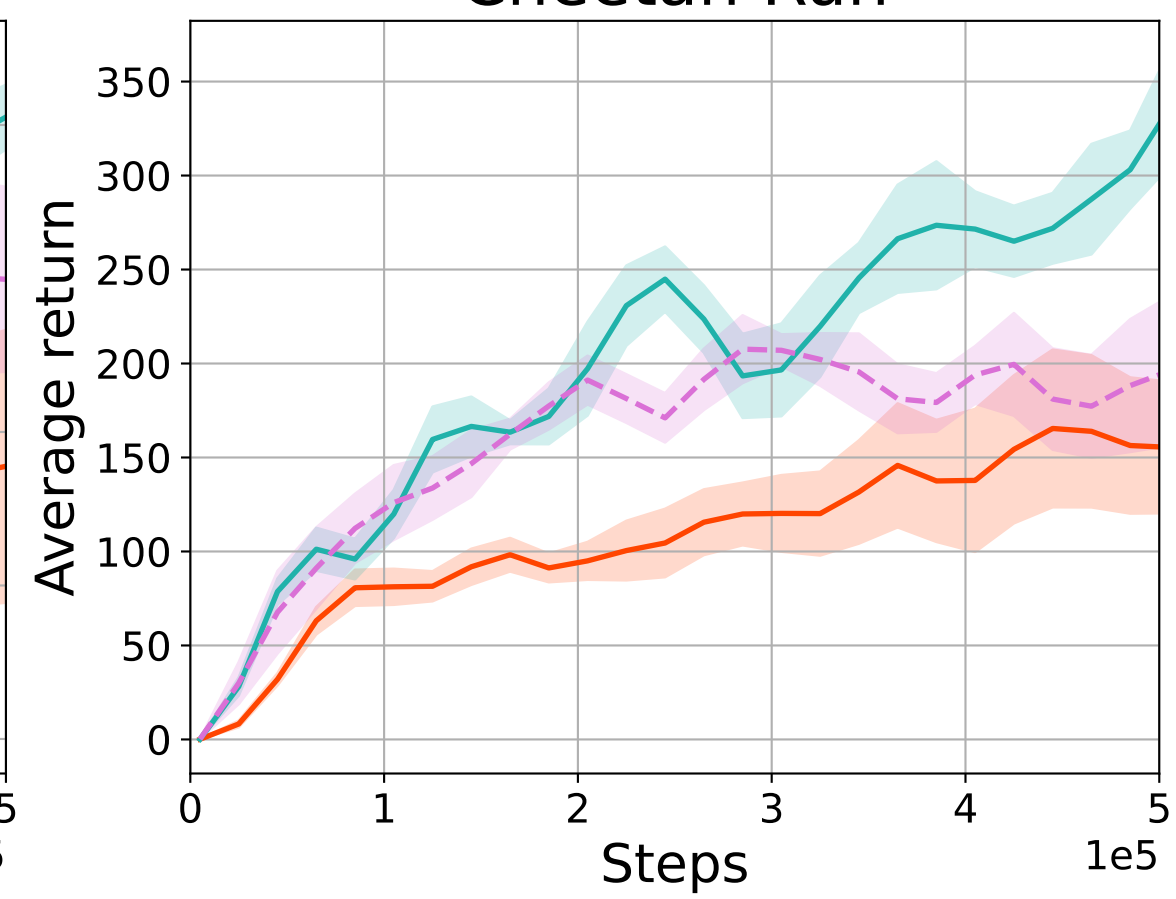

Supplement: supplementary_material [file attachment]

# Cheetah Run

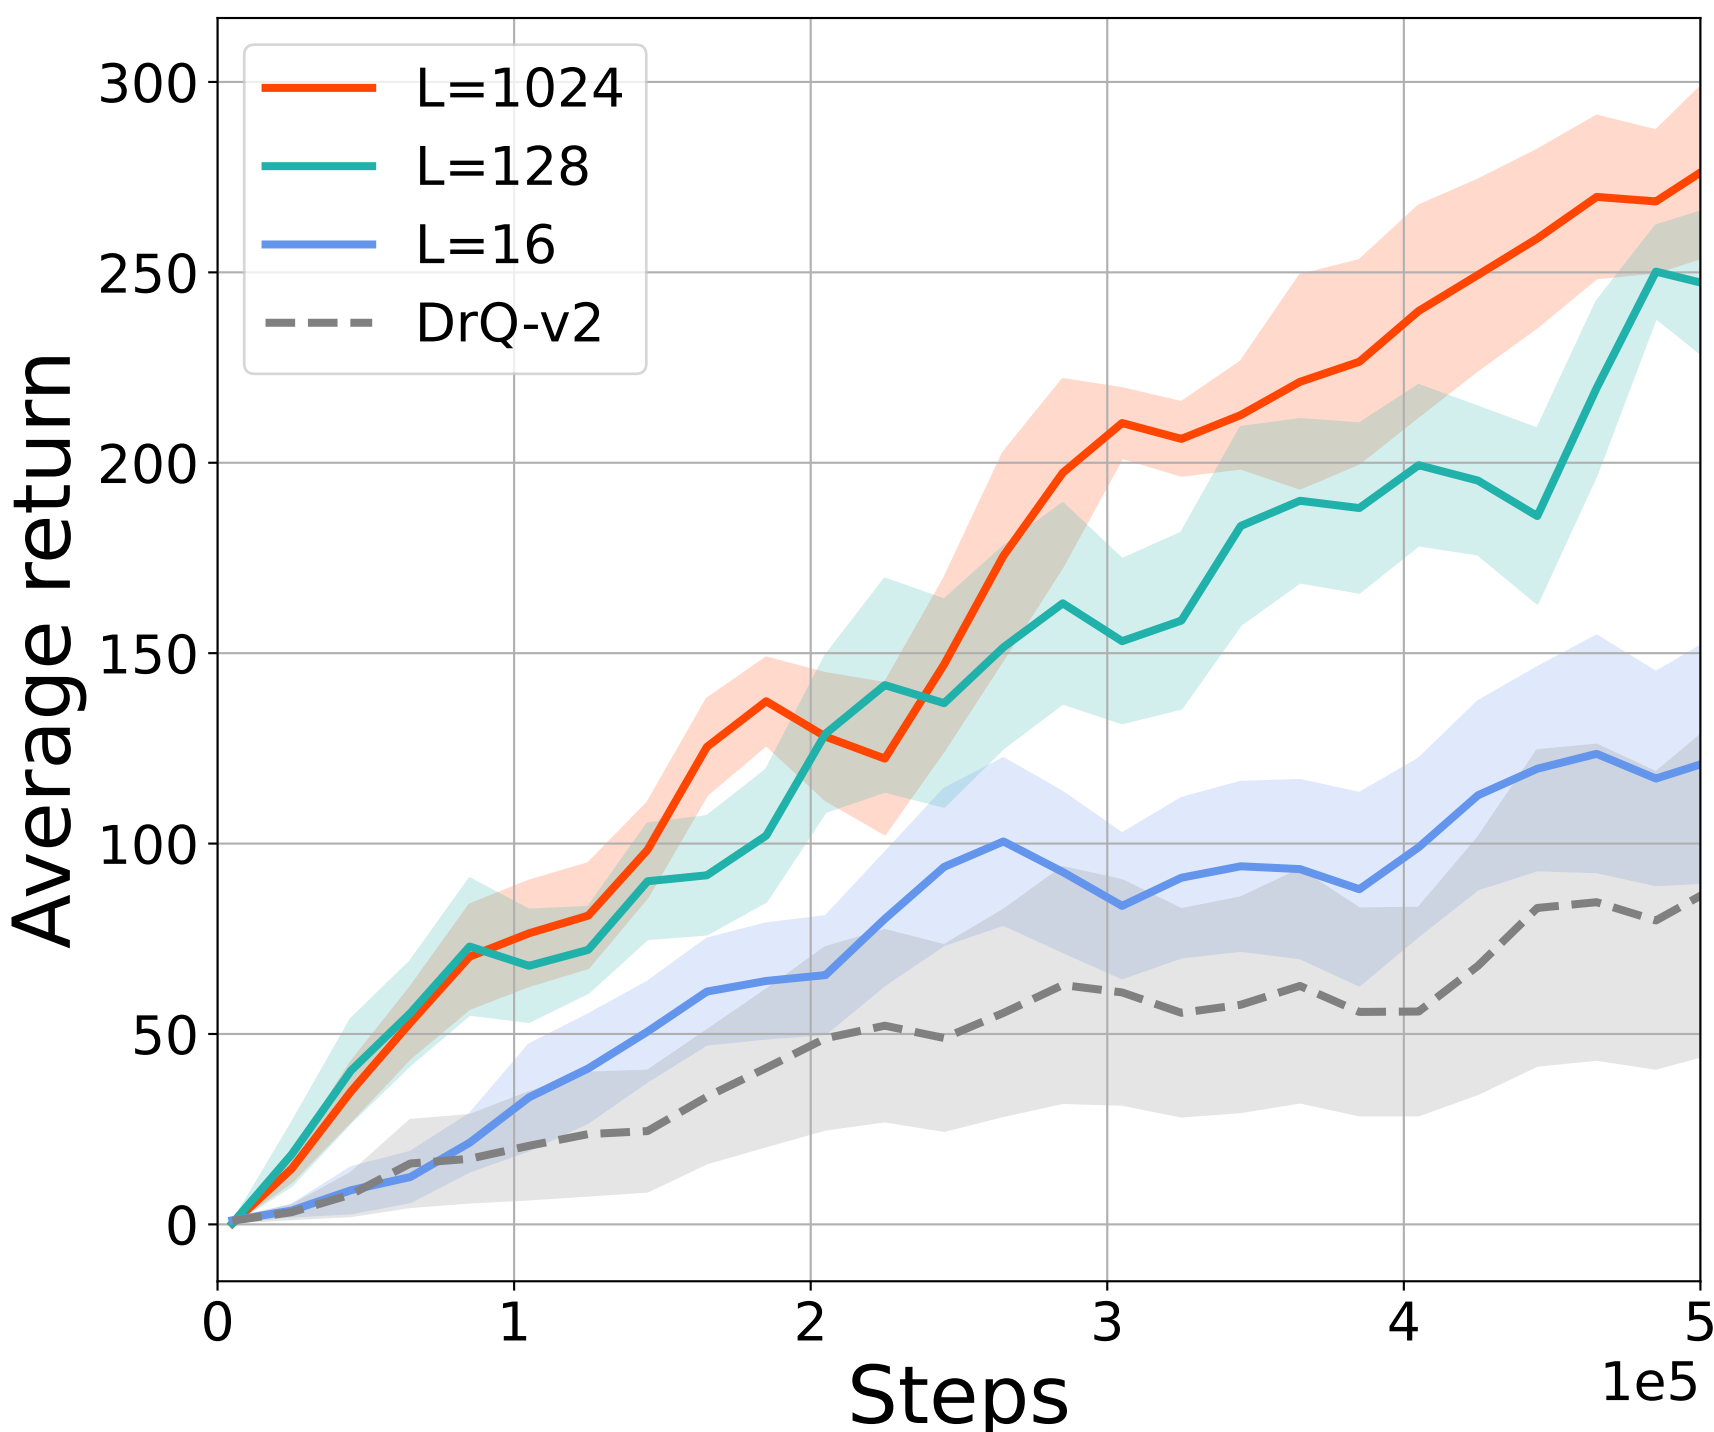

# Reacher Easy

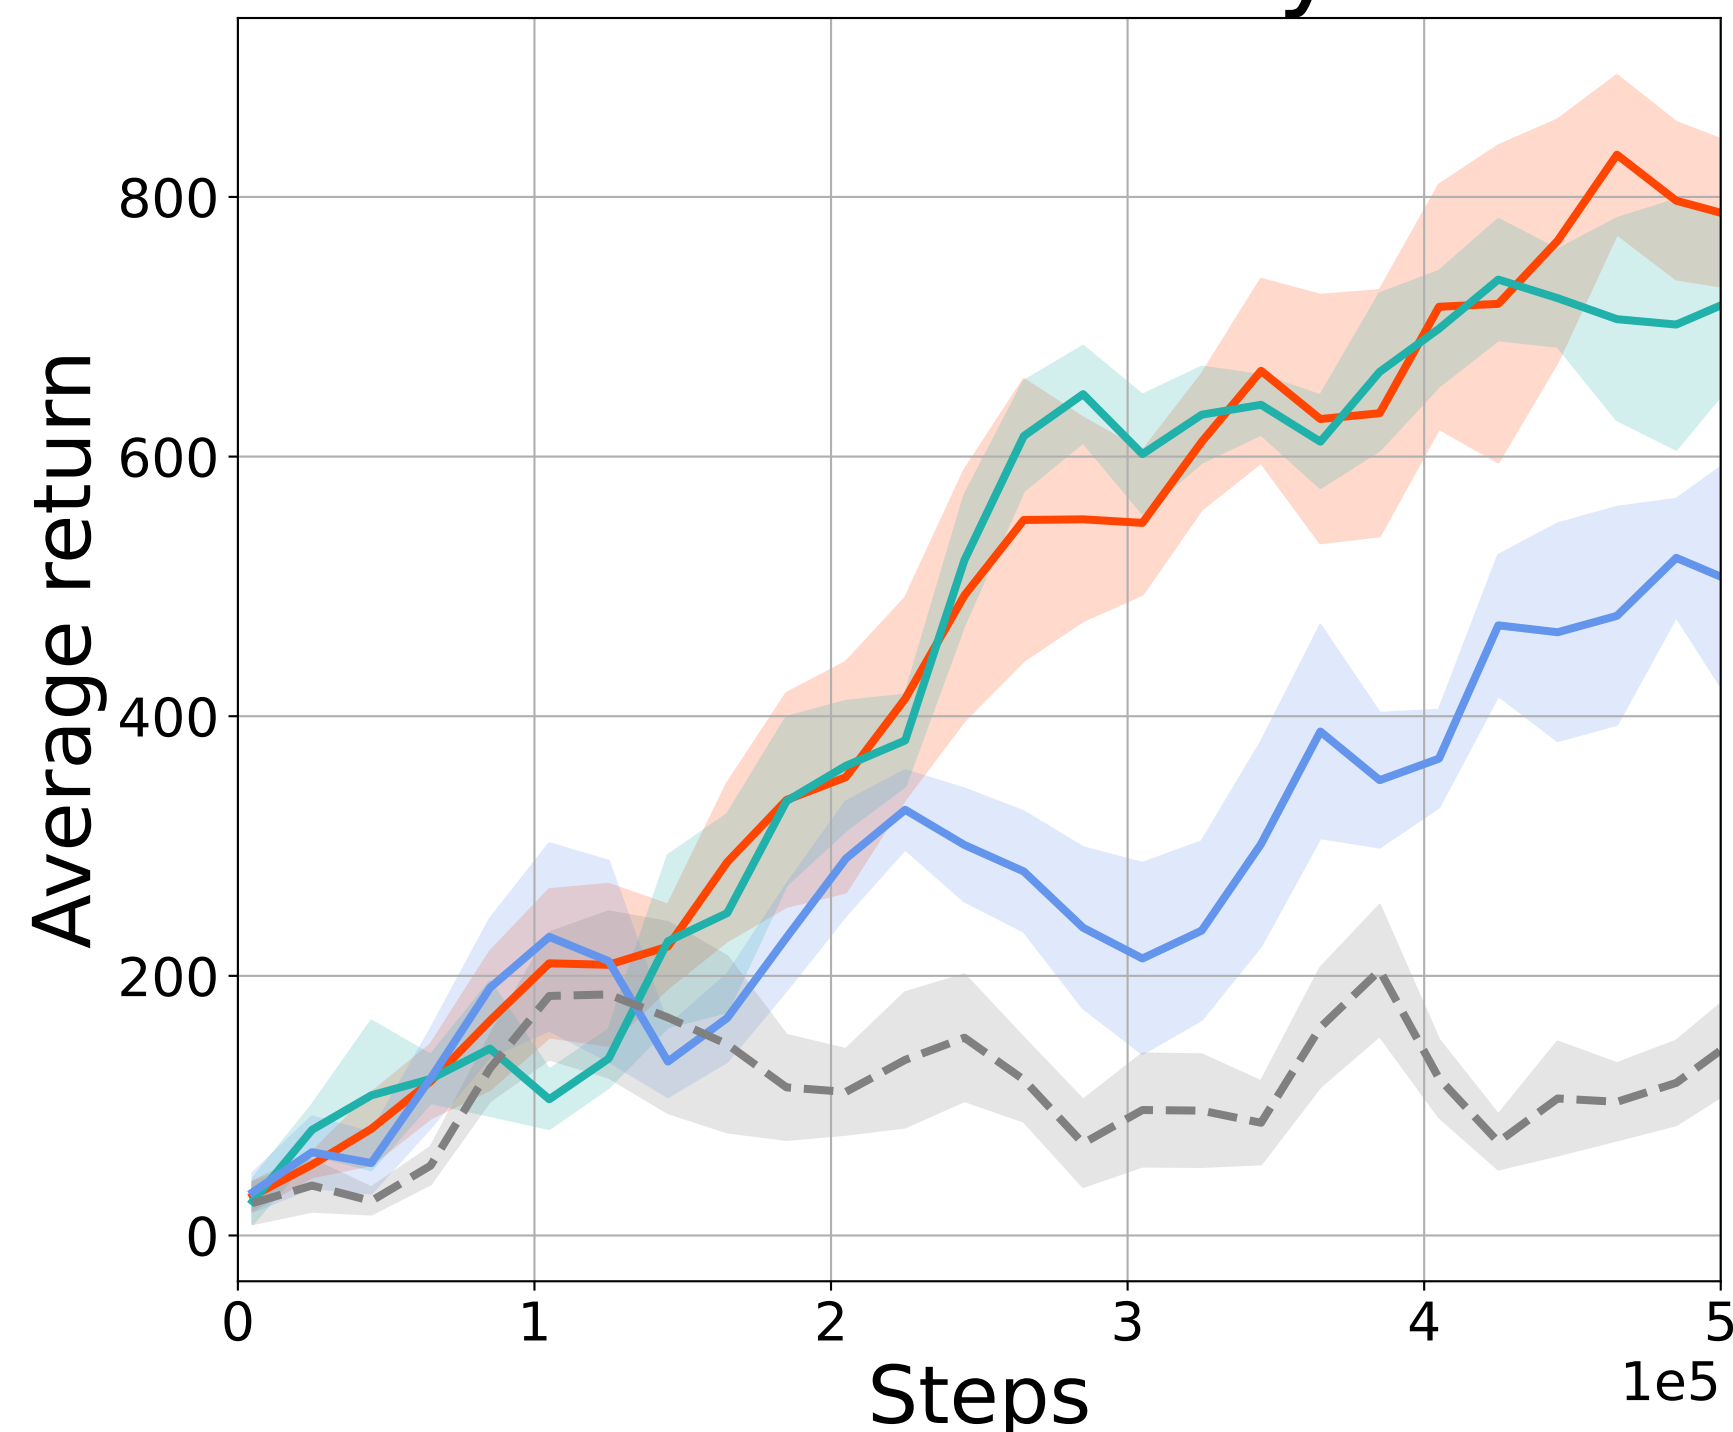

# Cartpole Swingup

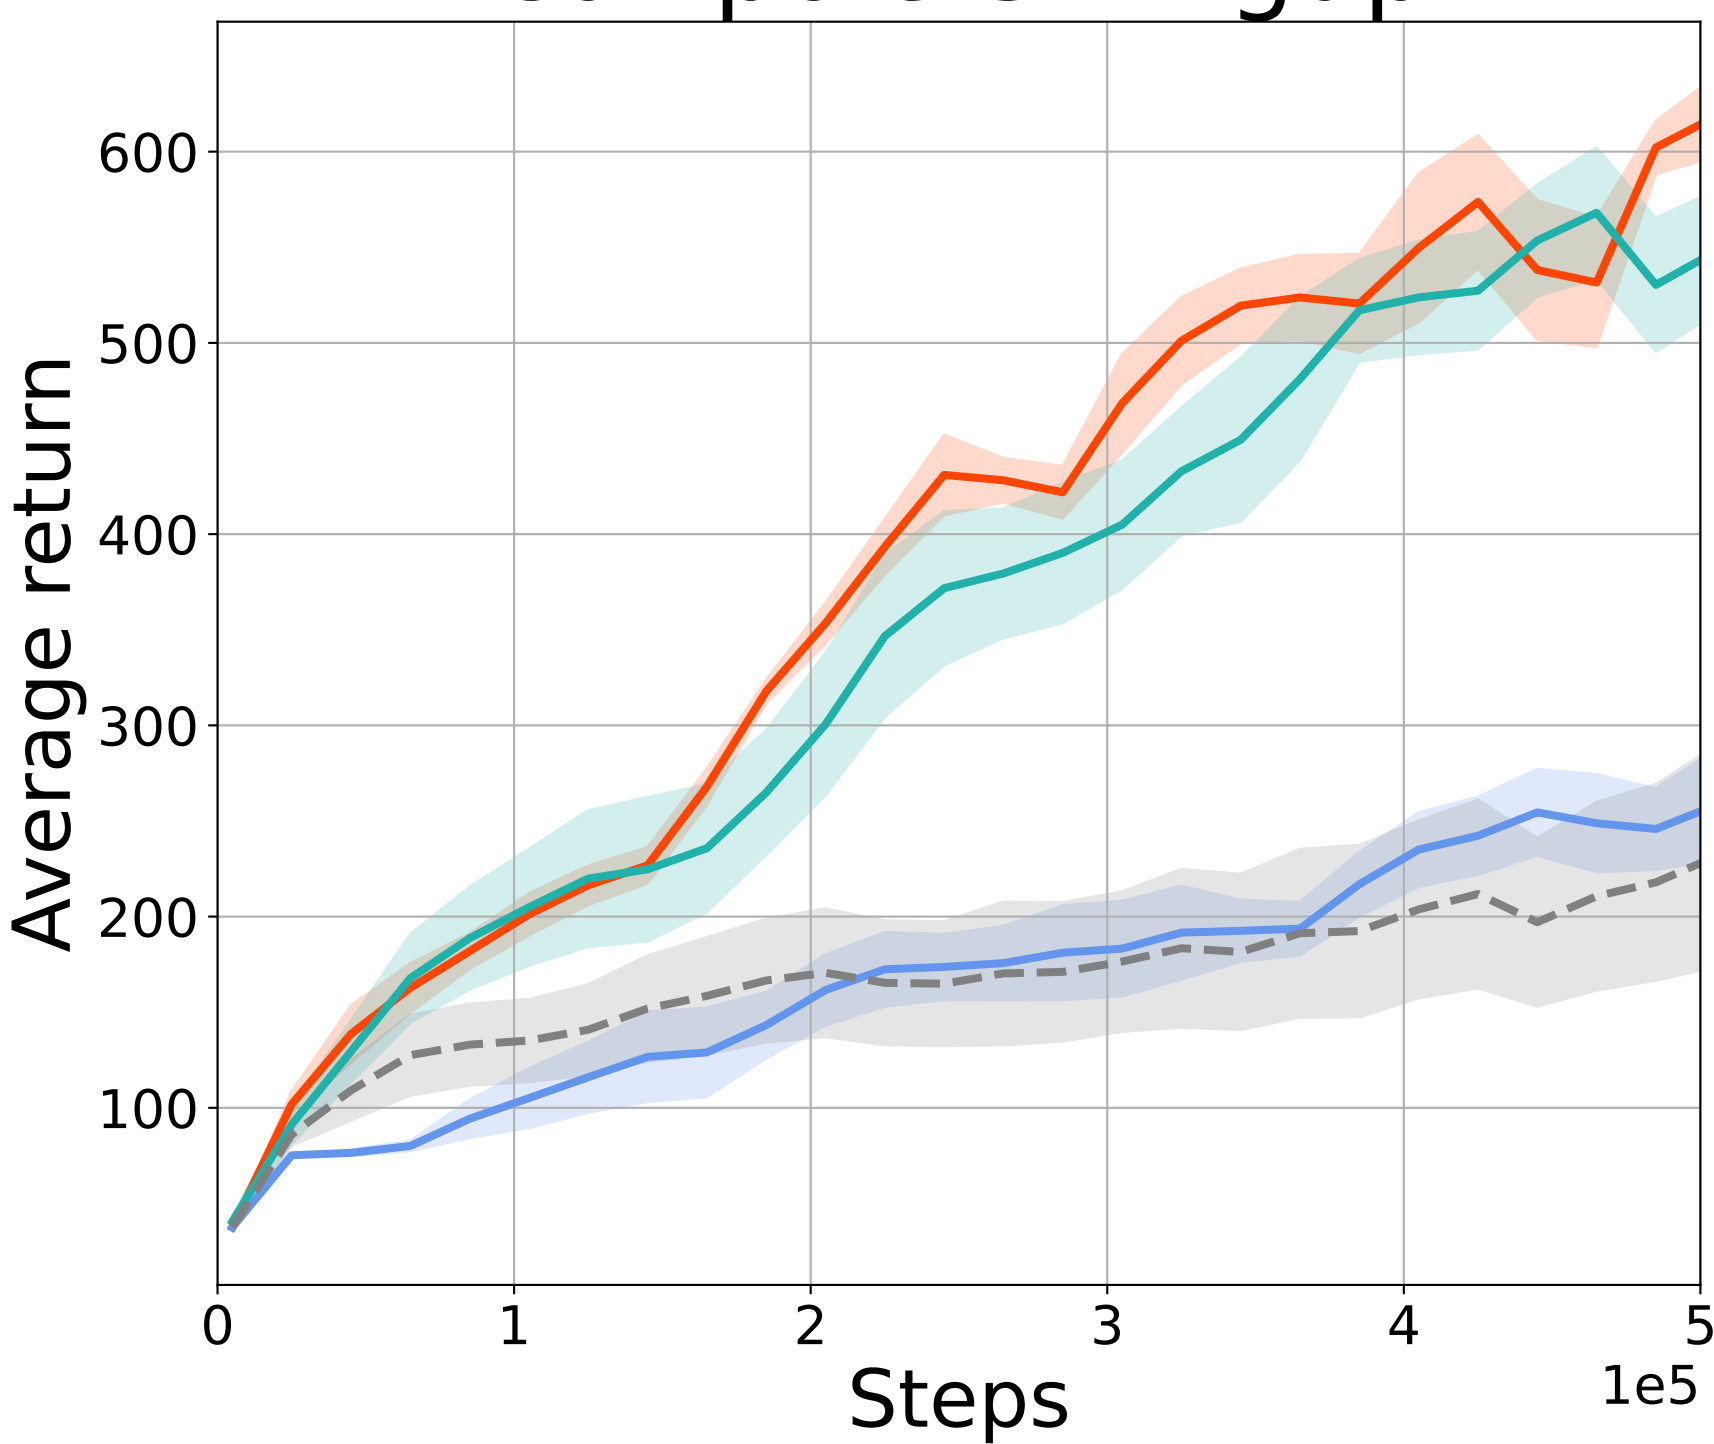

# Ball in Cup Catch

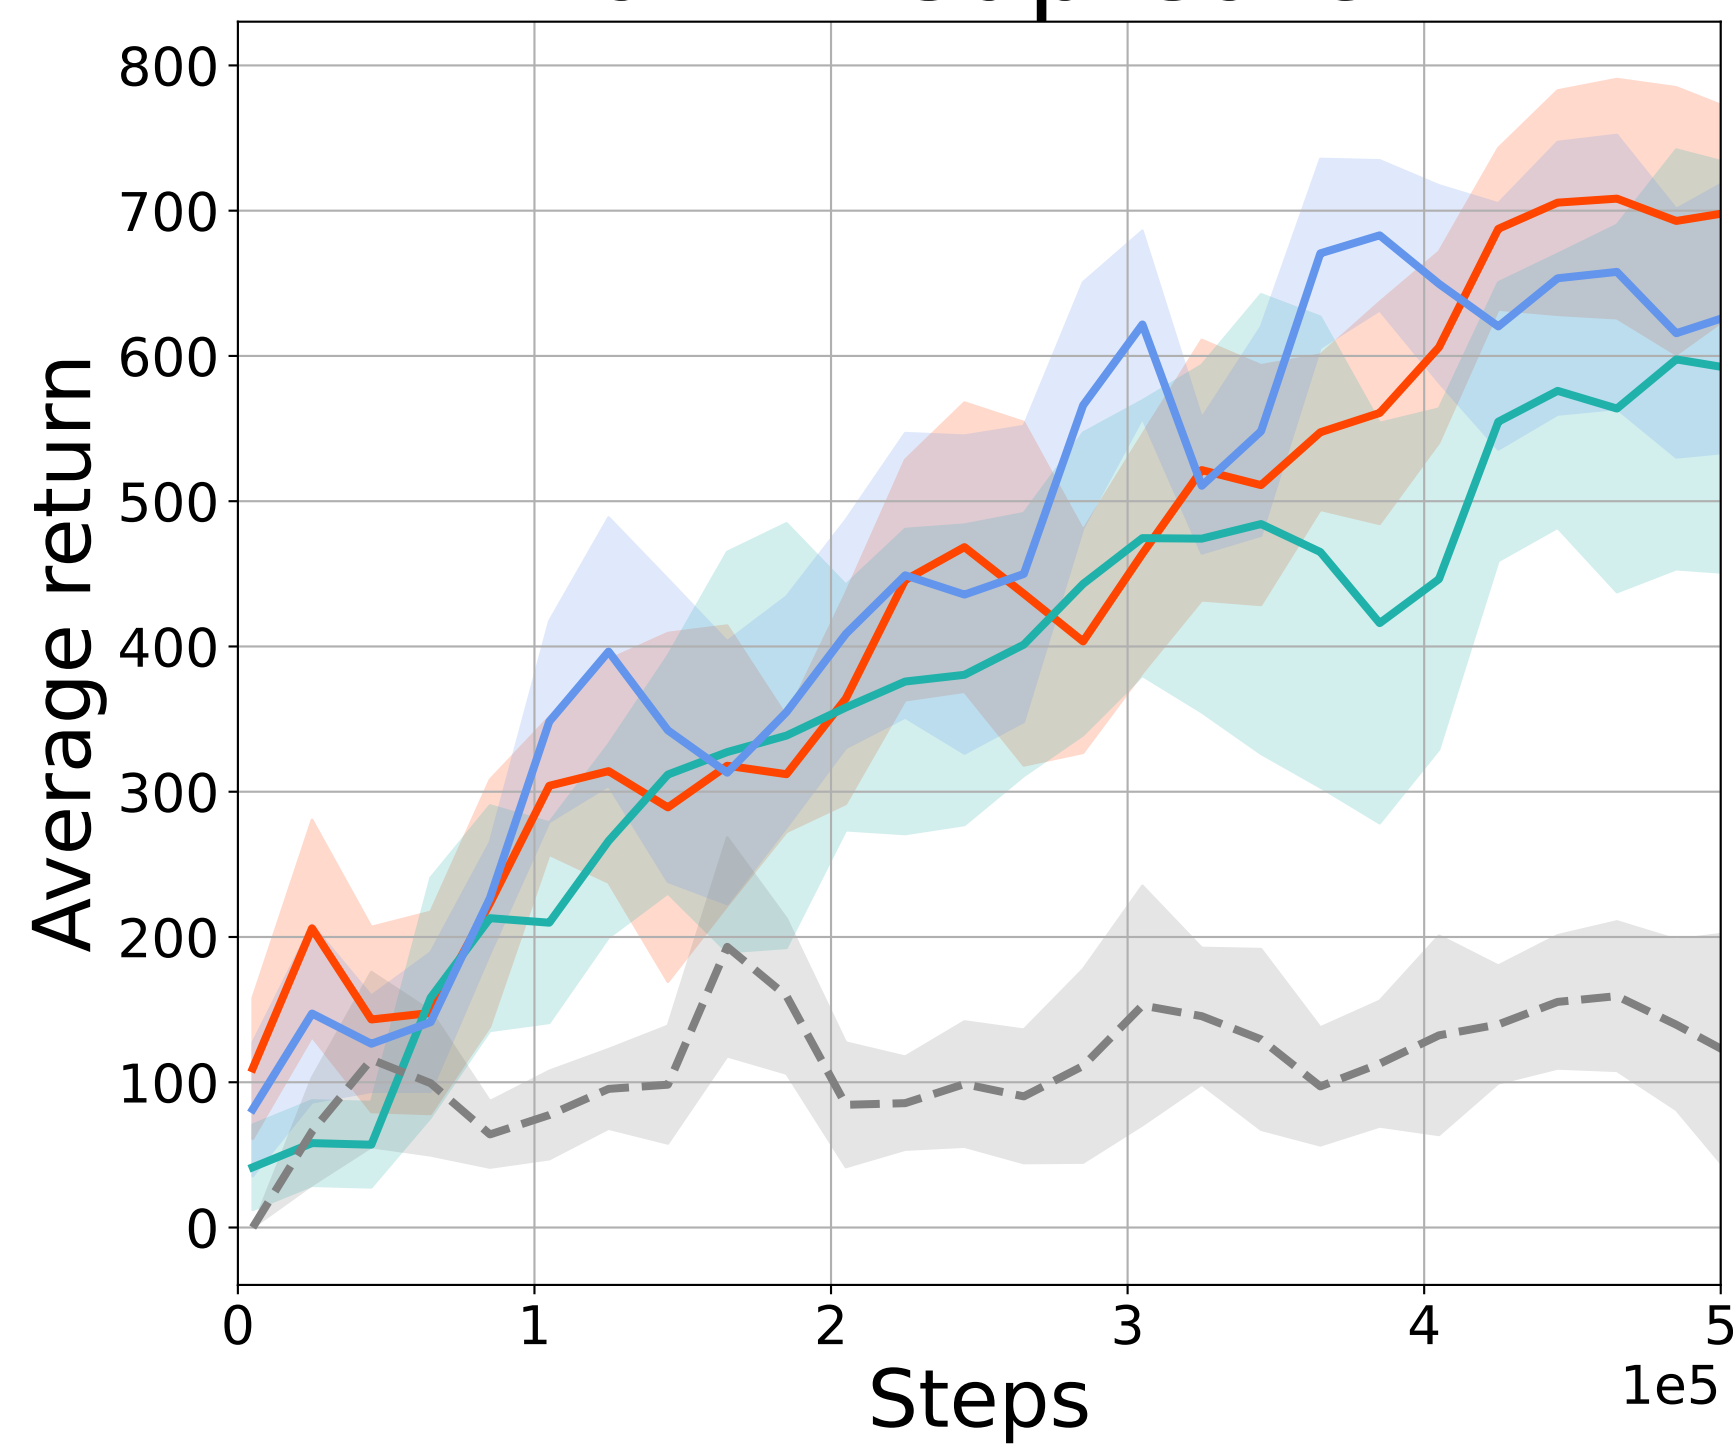

Supplement: supplementary_material [file attachment]

# Cartpole Swingup

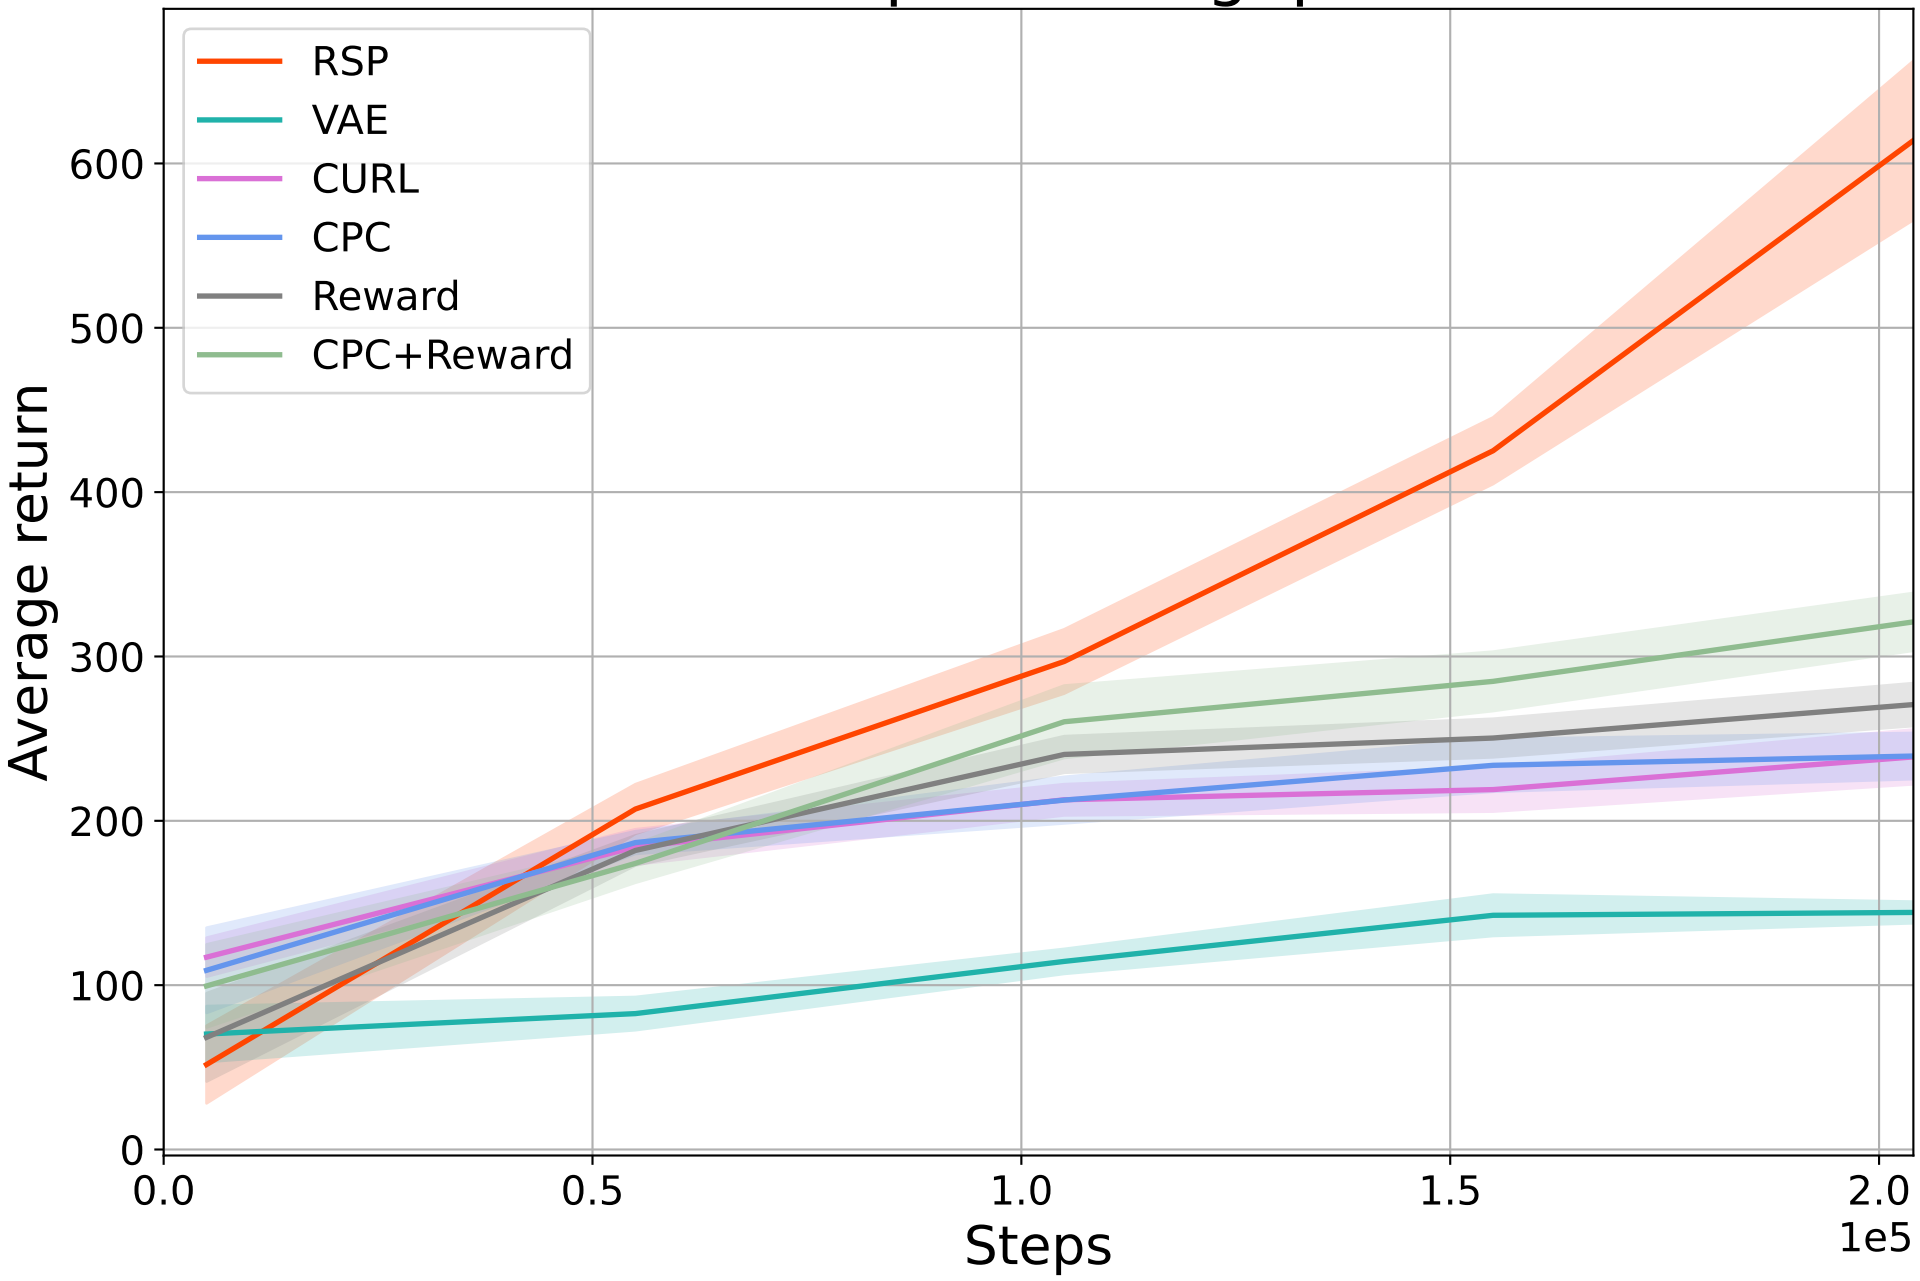

Supplement: supplementary_material [file attachment]

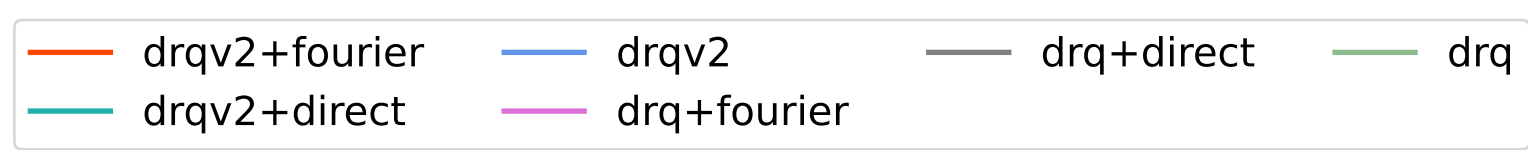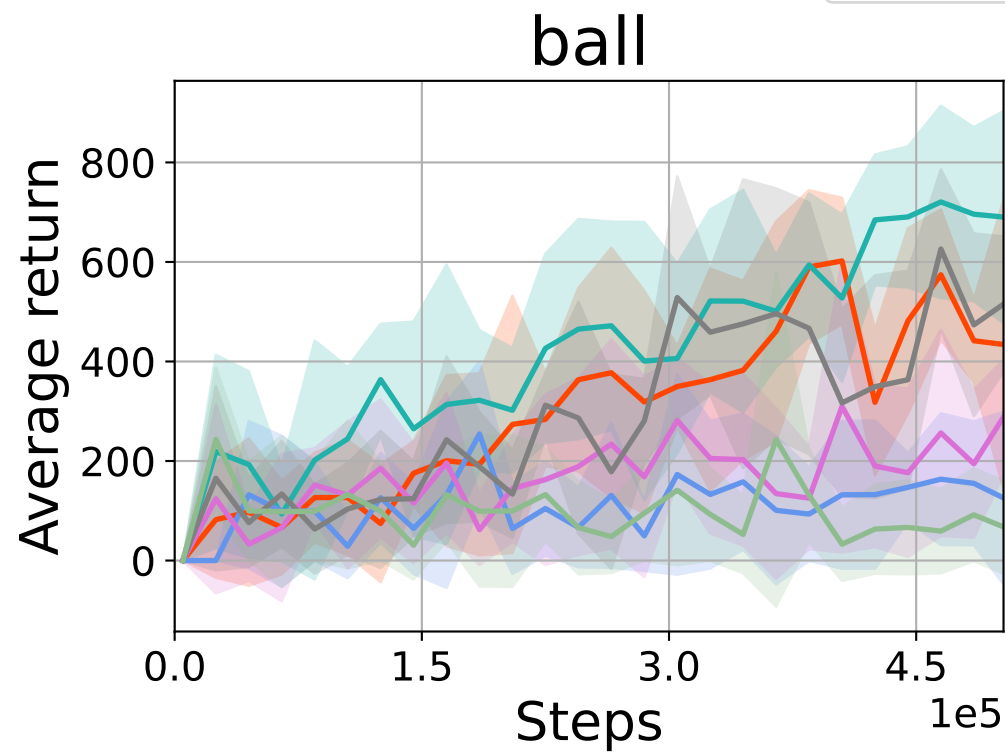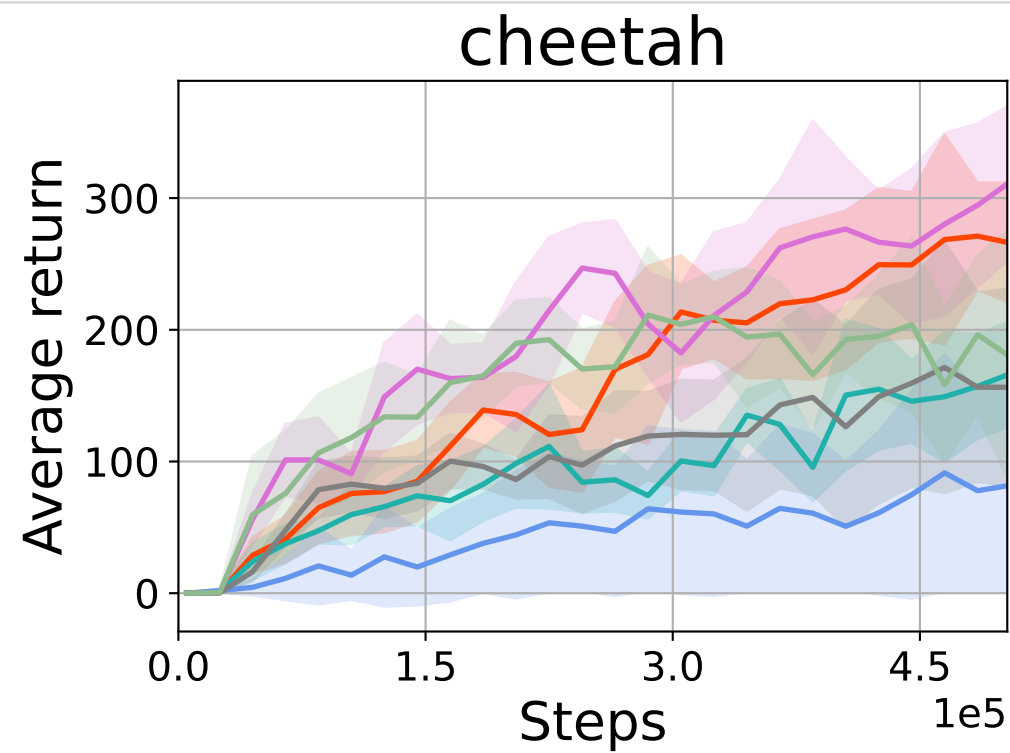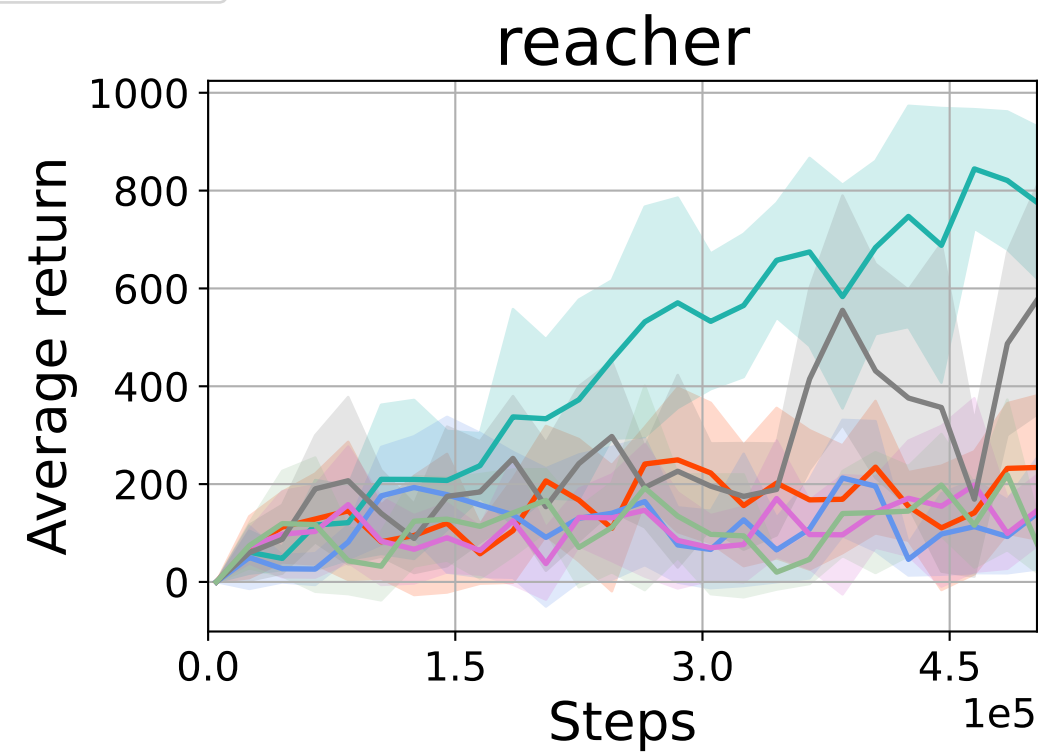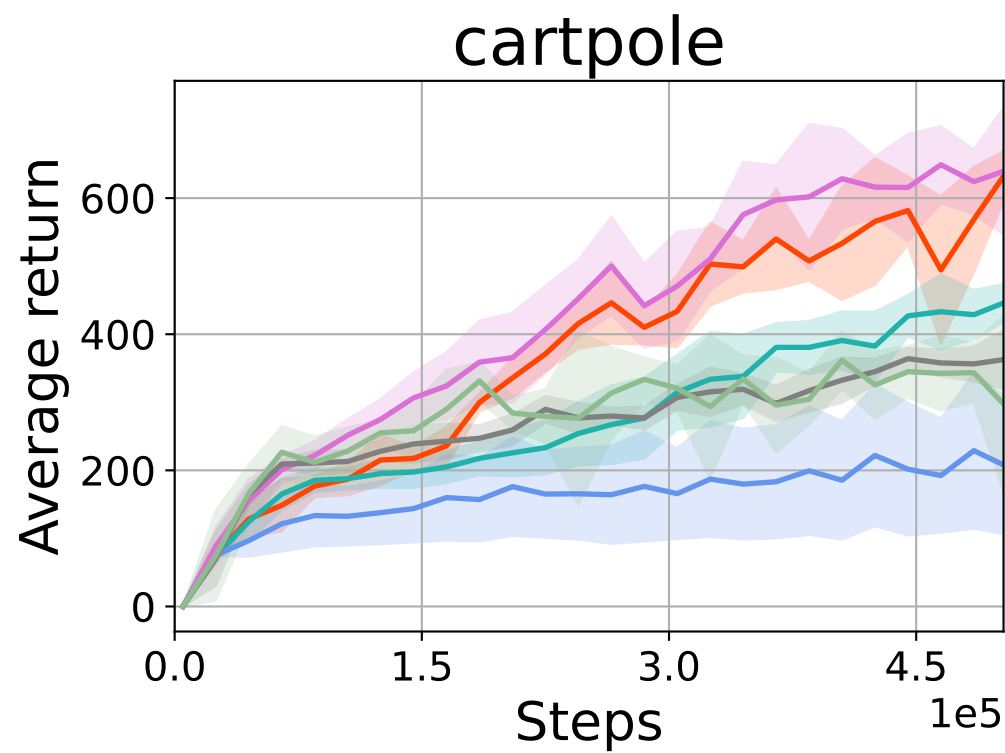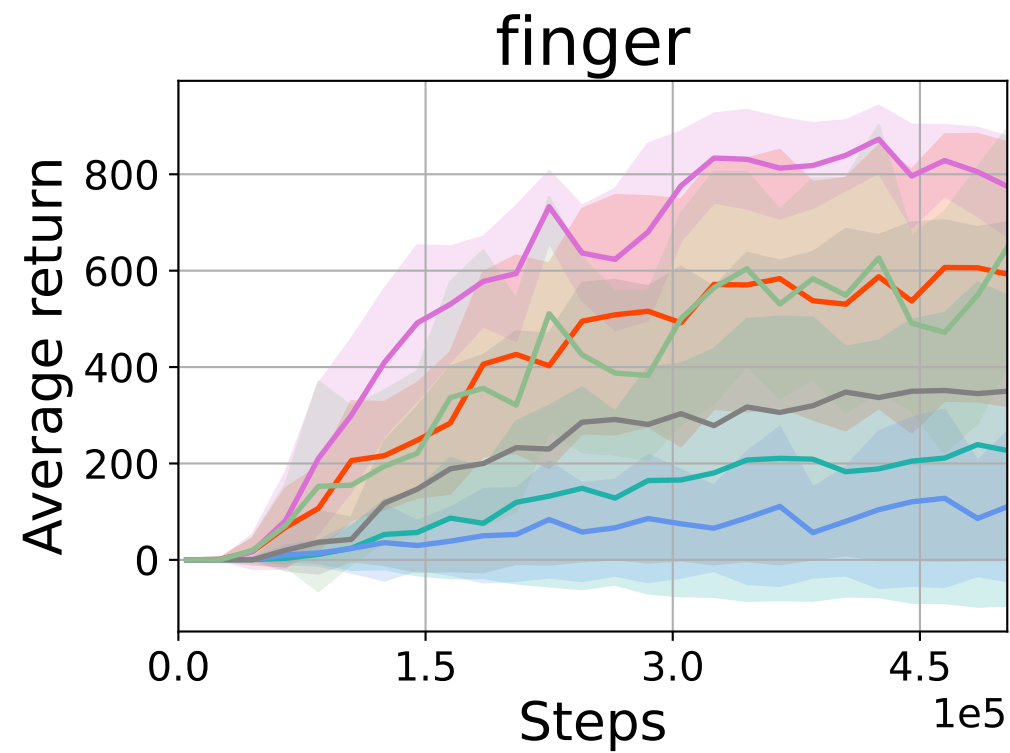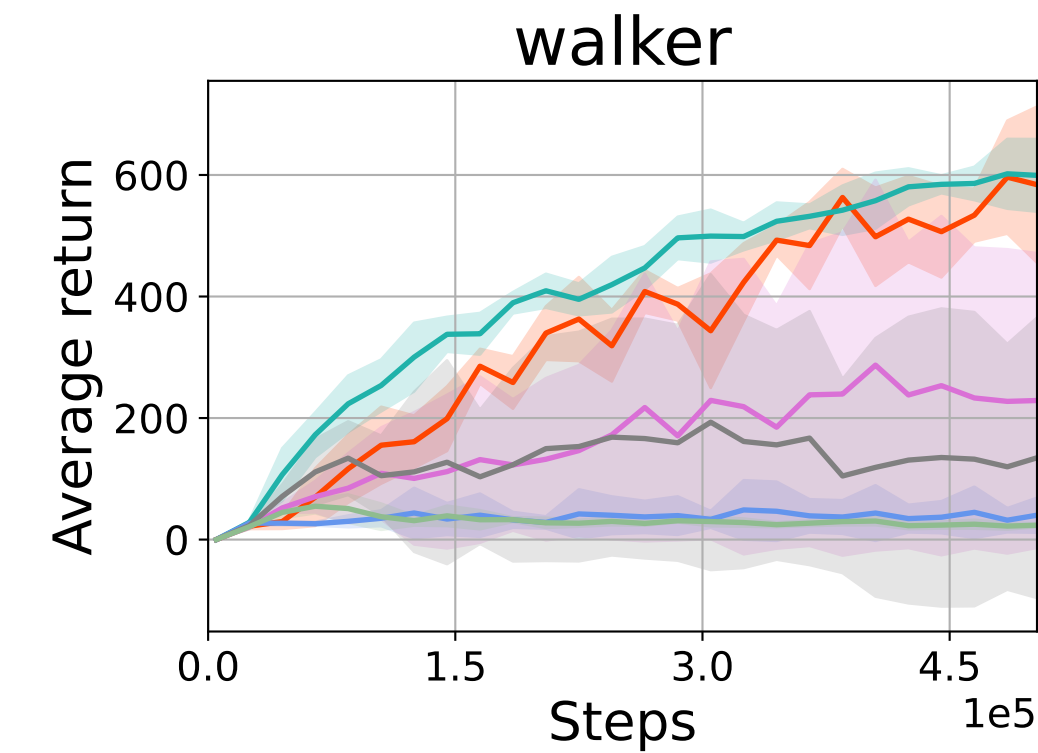

Supplement: supplementary_material [file attachment]

### Max Pred. Q

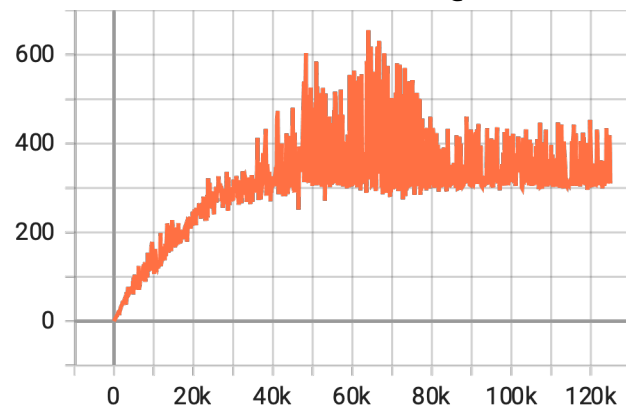

### Q loss

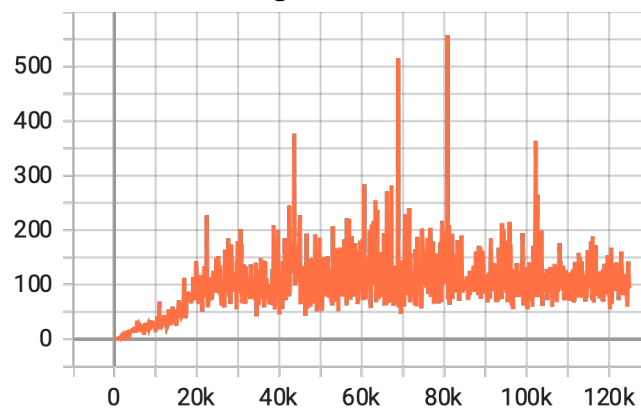

### Average return

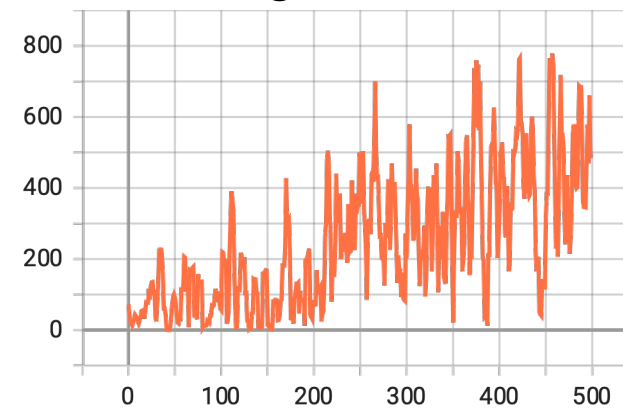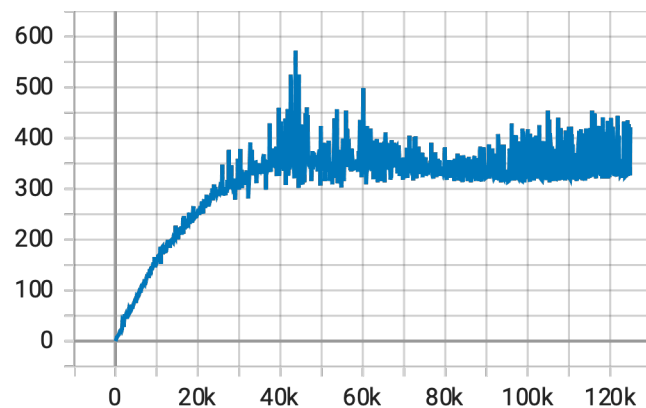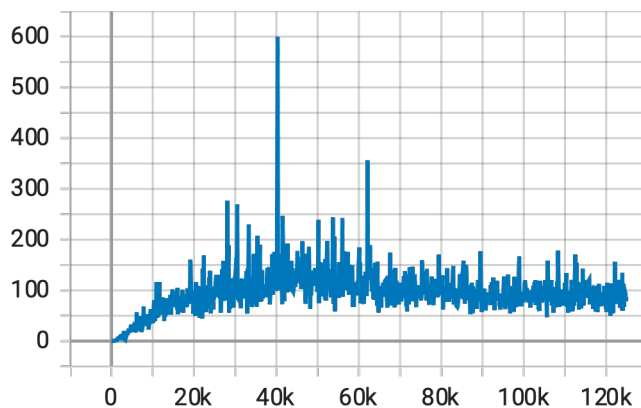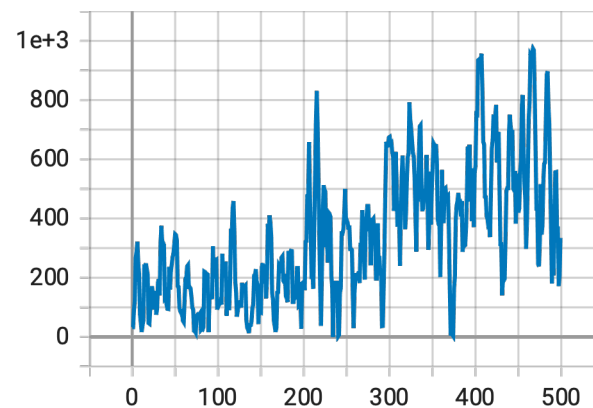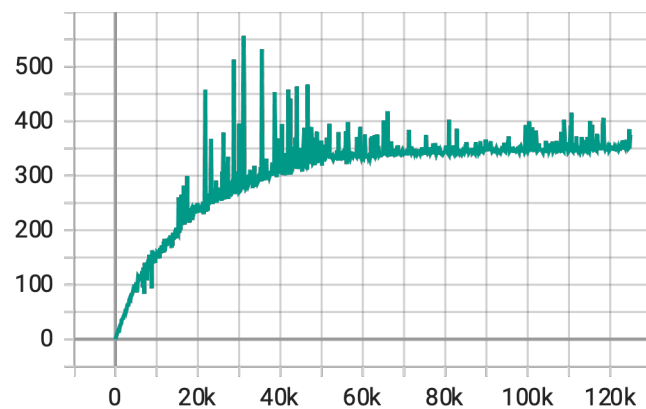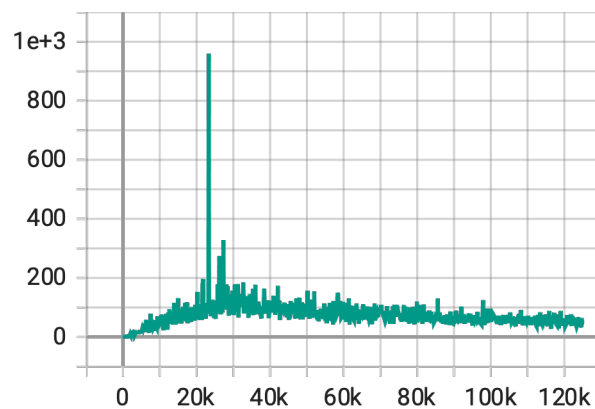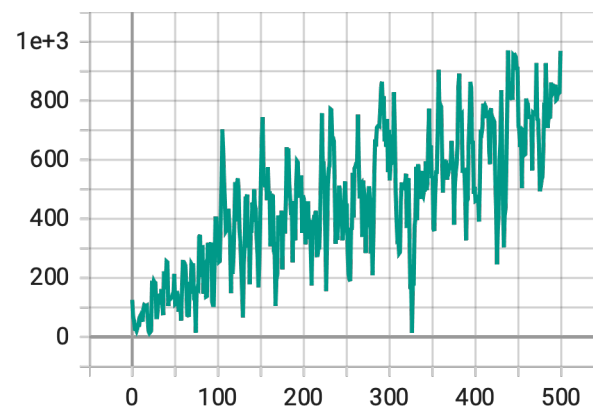

Supplement: supplementary_material [file attachment]

# Cartpole Swingup

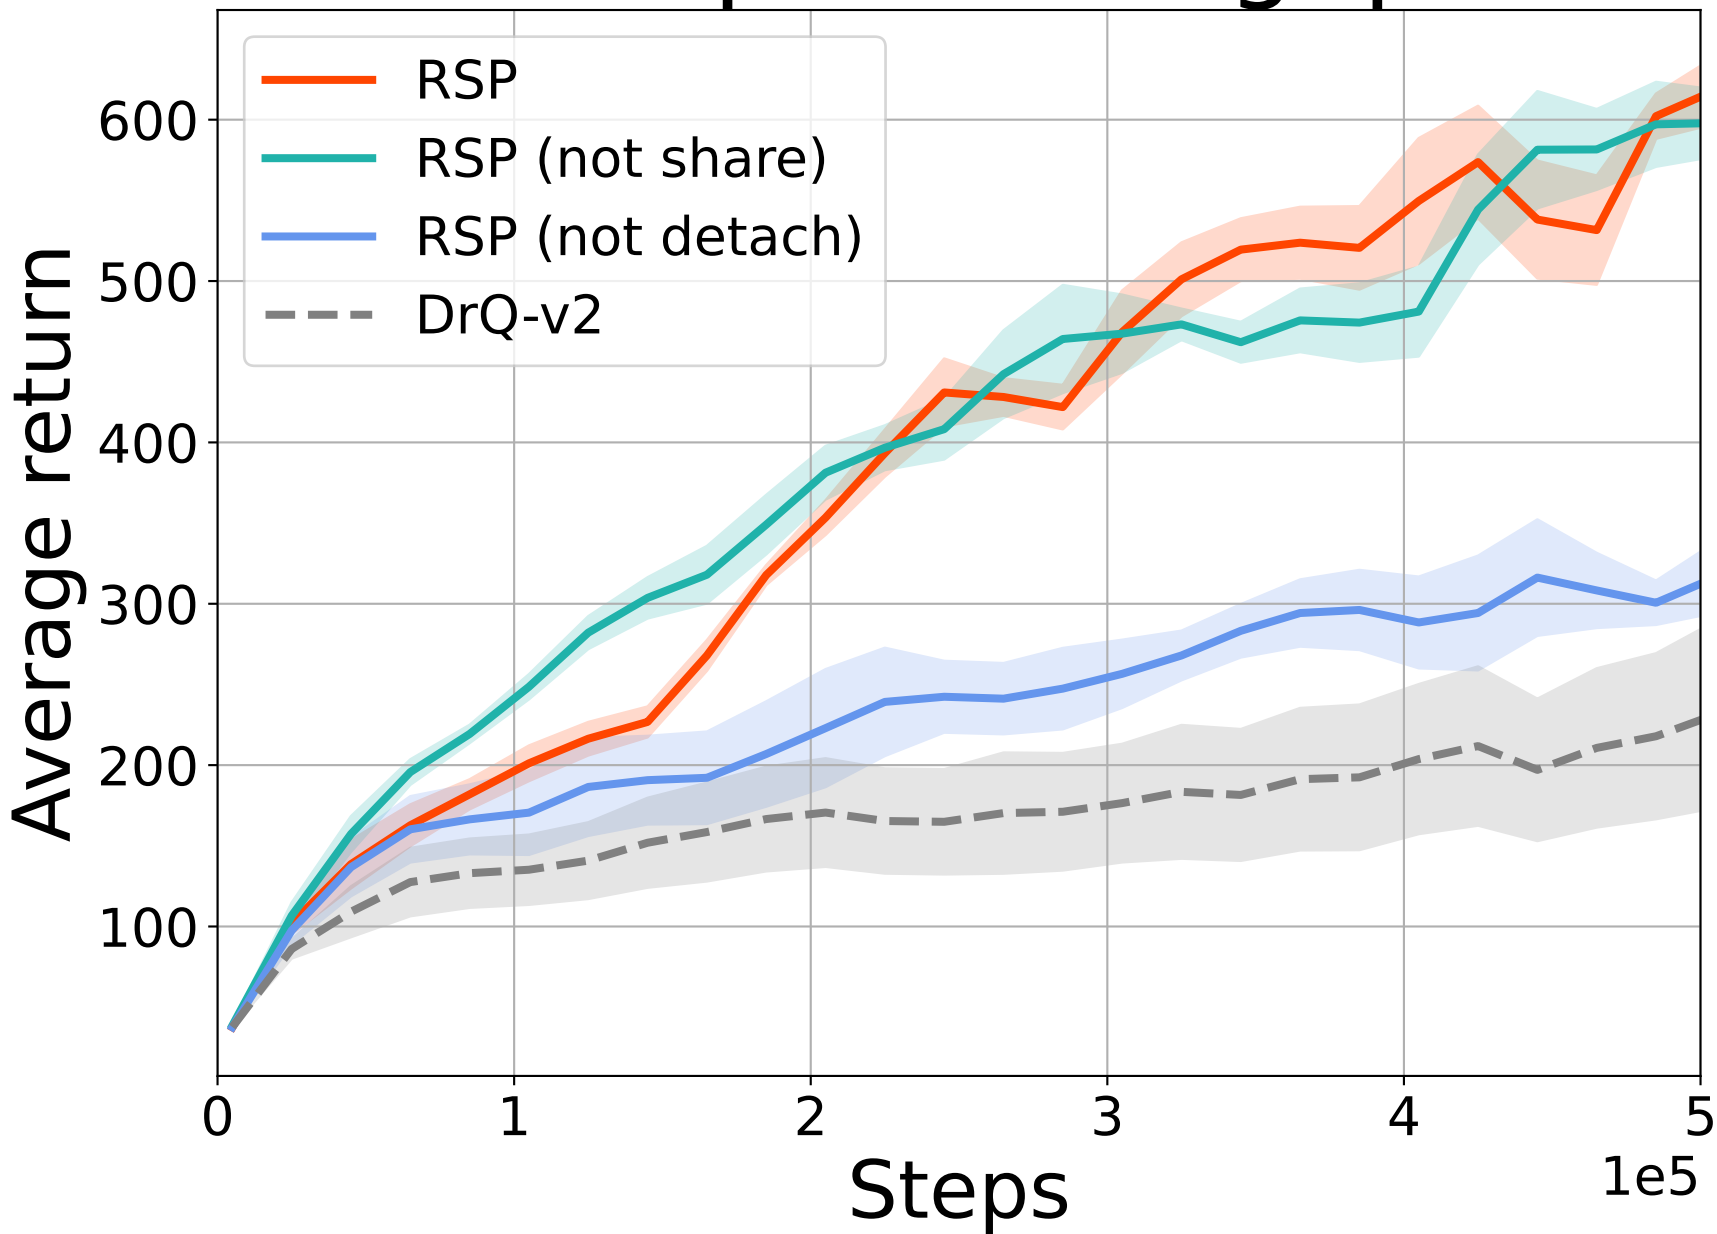

# Reacher Easy

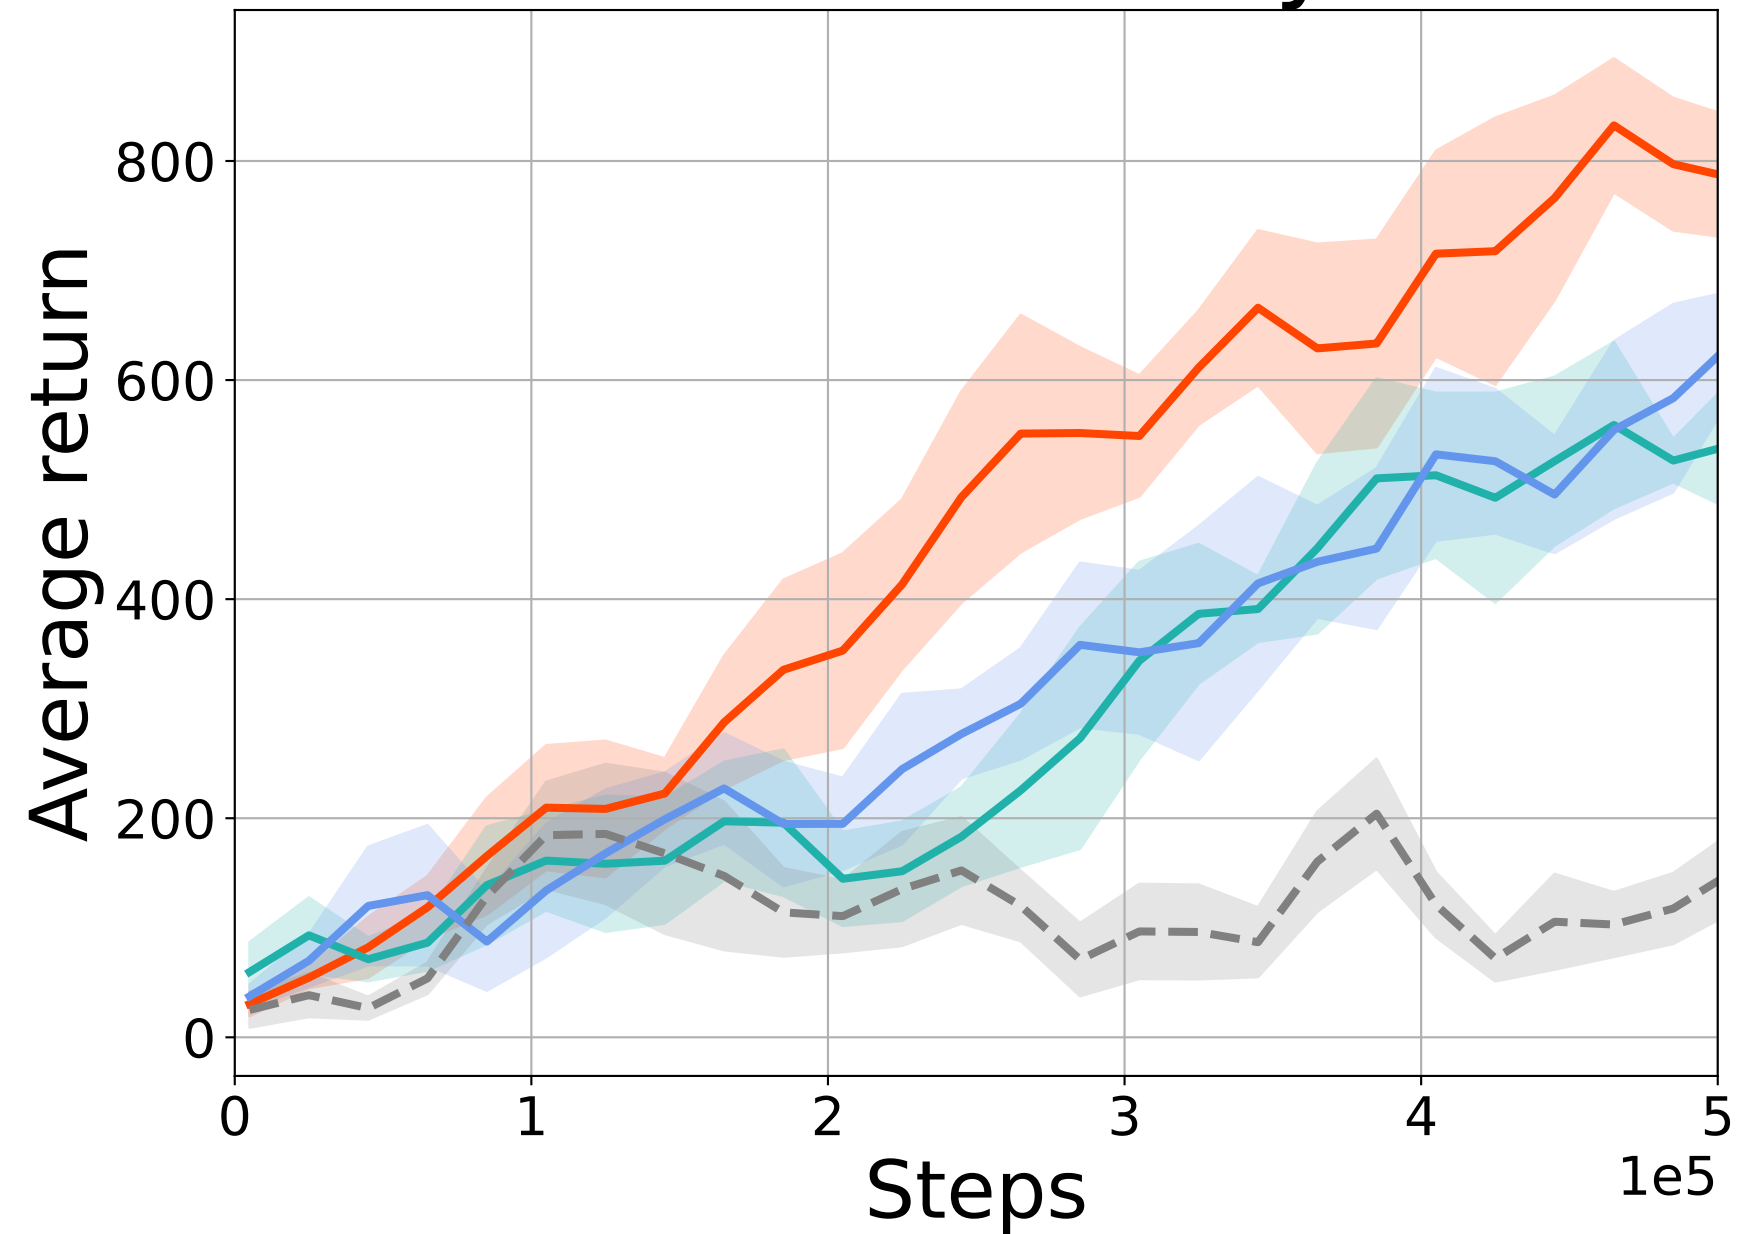

Supplement: supplementary_material [file attachment]

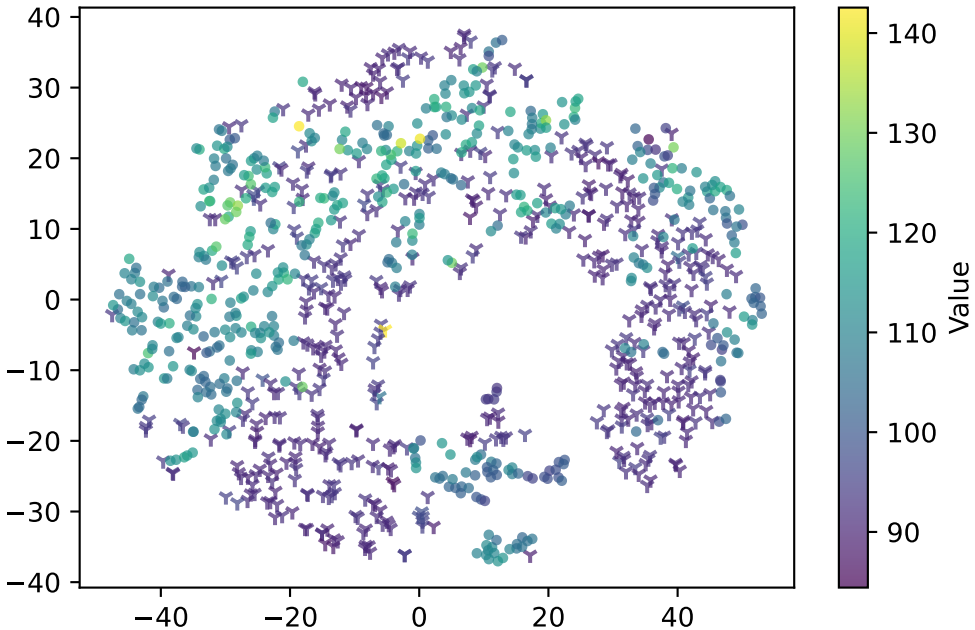

Supplement: supplementary_material [file attachment]

### Ball in Cup Catch

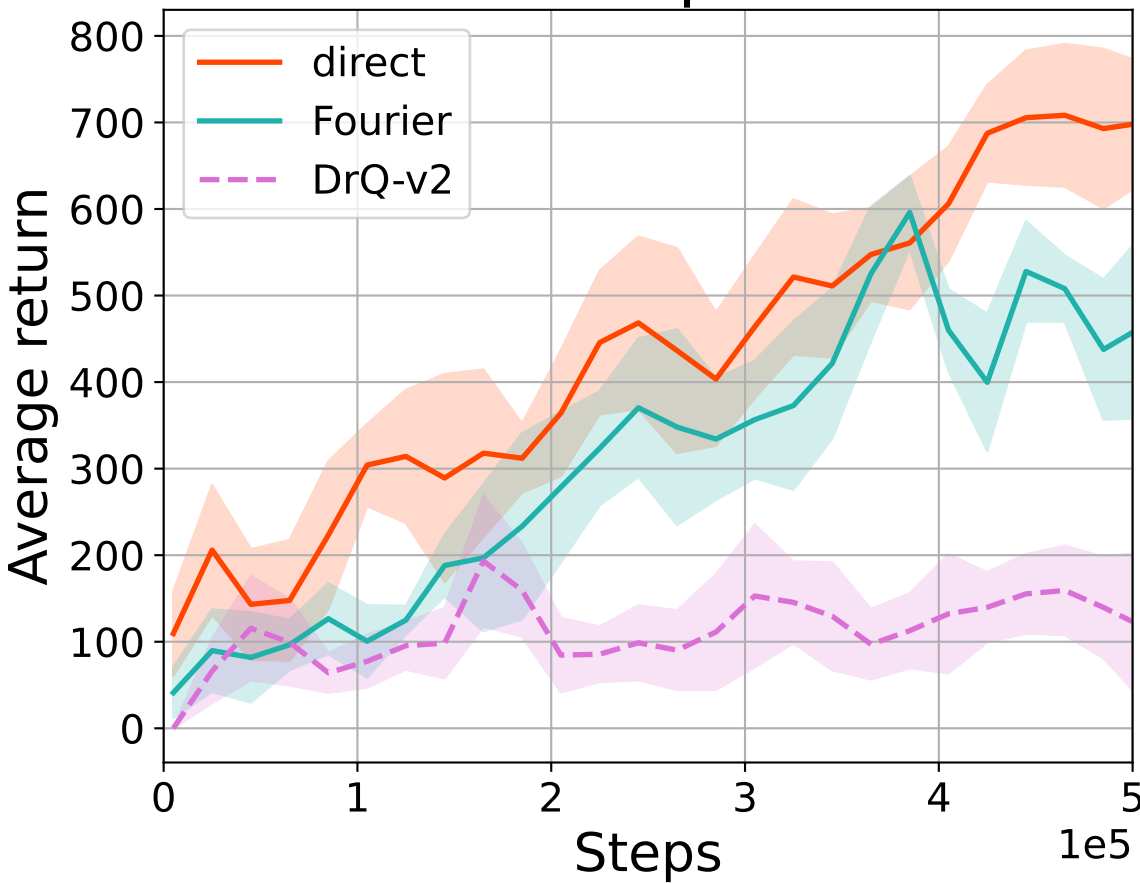

### Reacher Easy

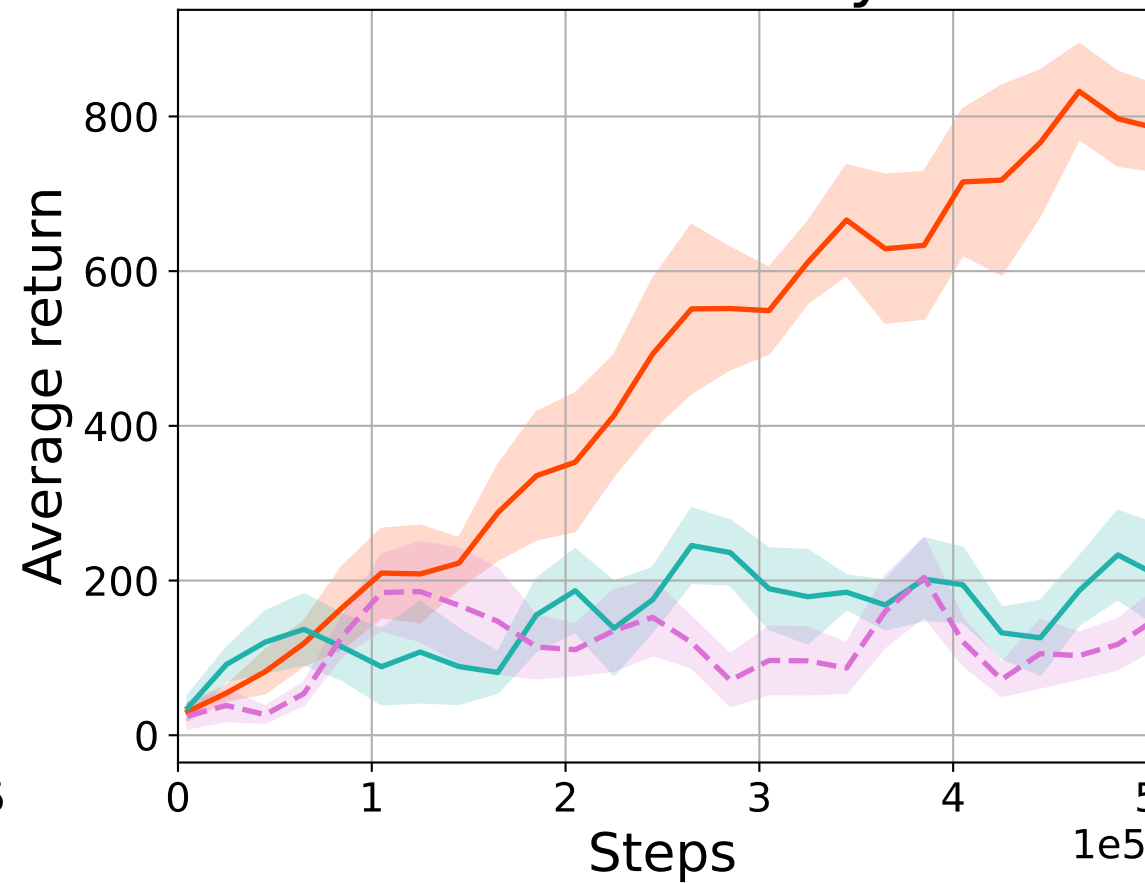

### Walker Walk

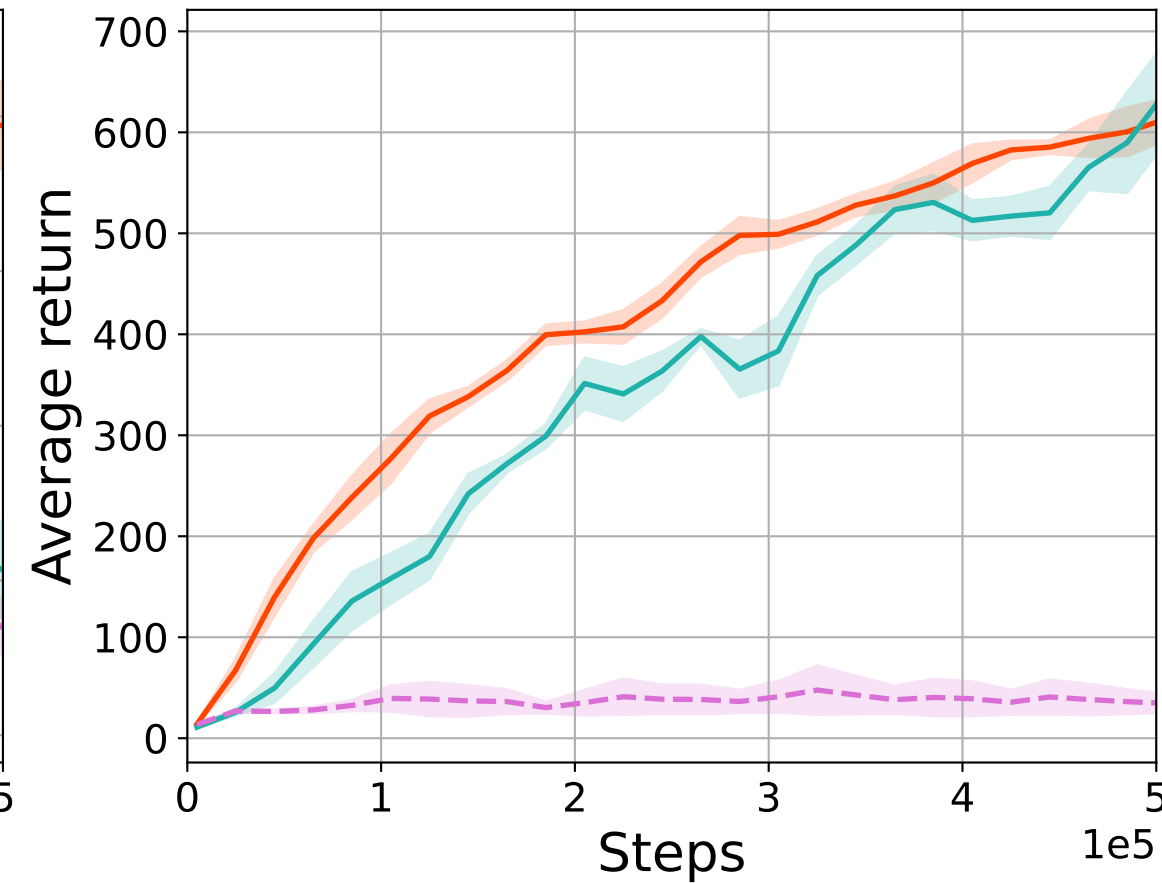

### Cartpole Swingup

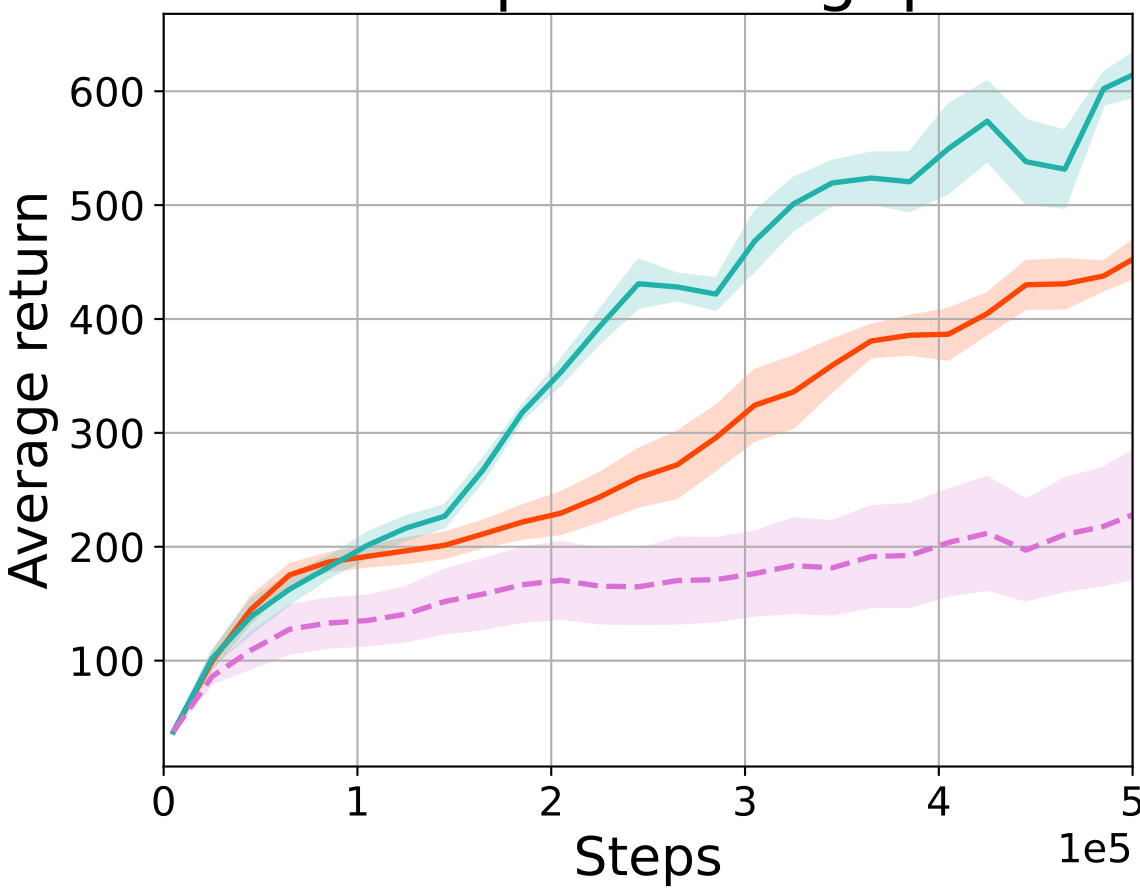

### Finger Spin

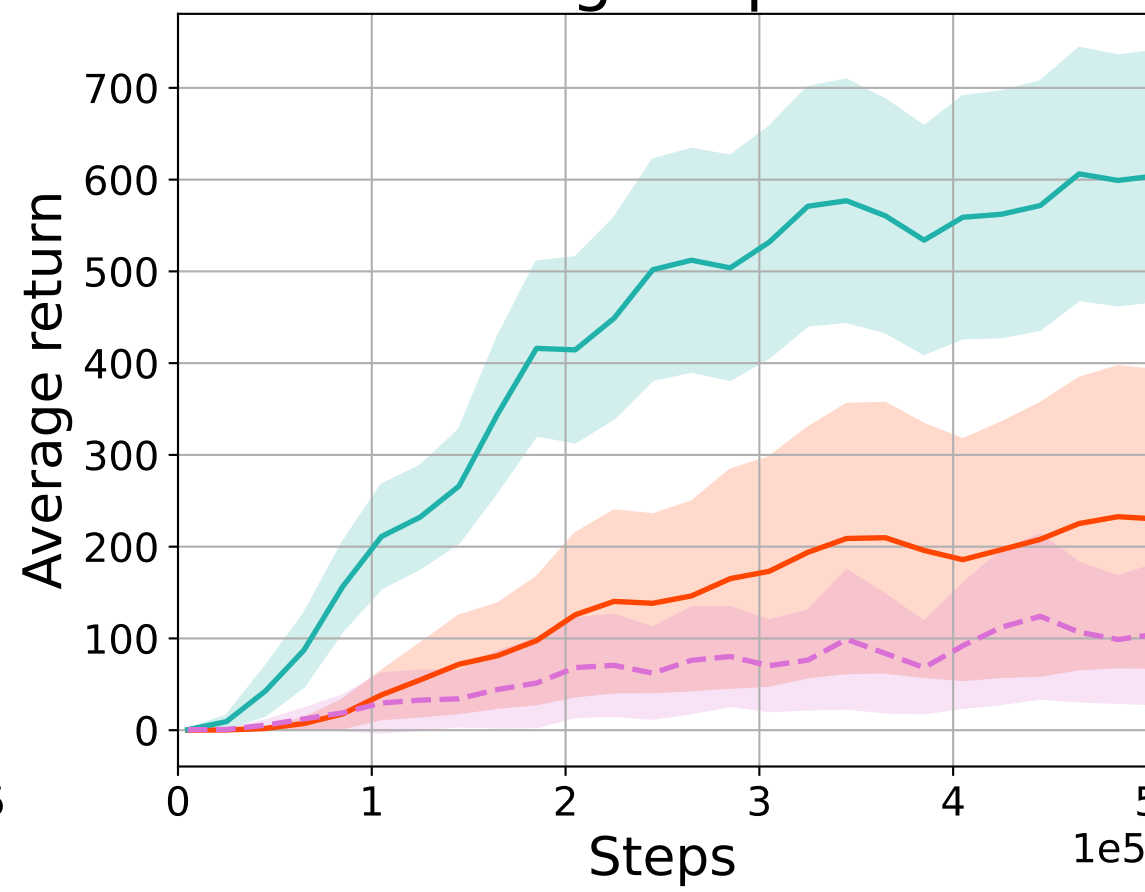

### Cheetah Run

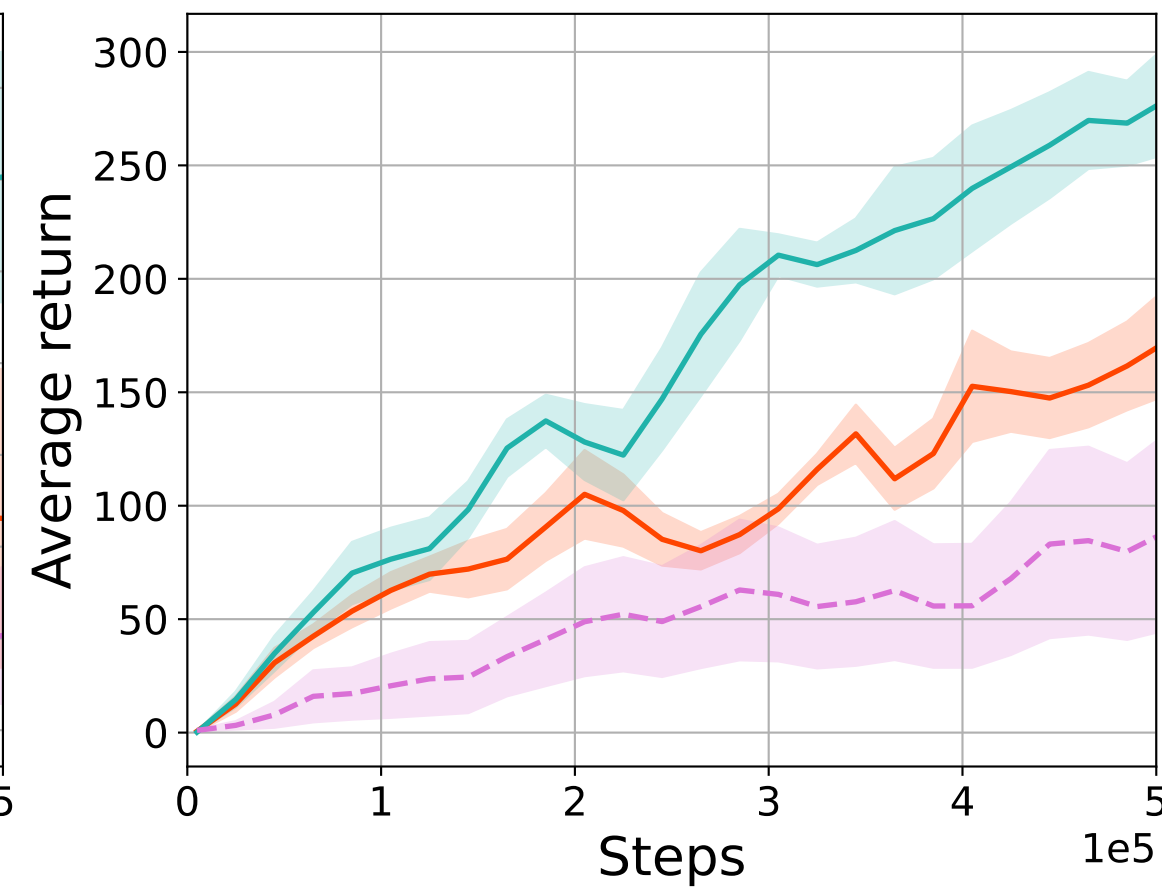

Supplement: supplementary_material [file attachment]

Reacher Easy

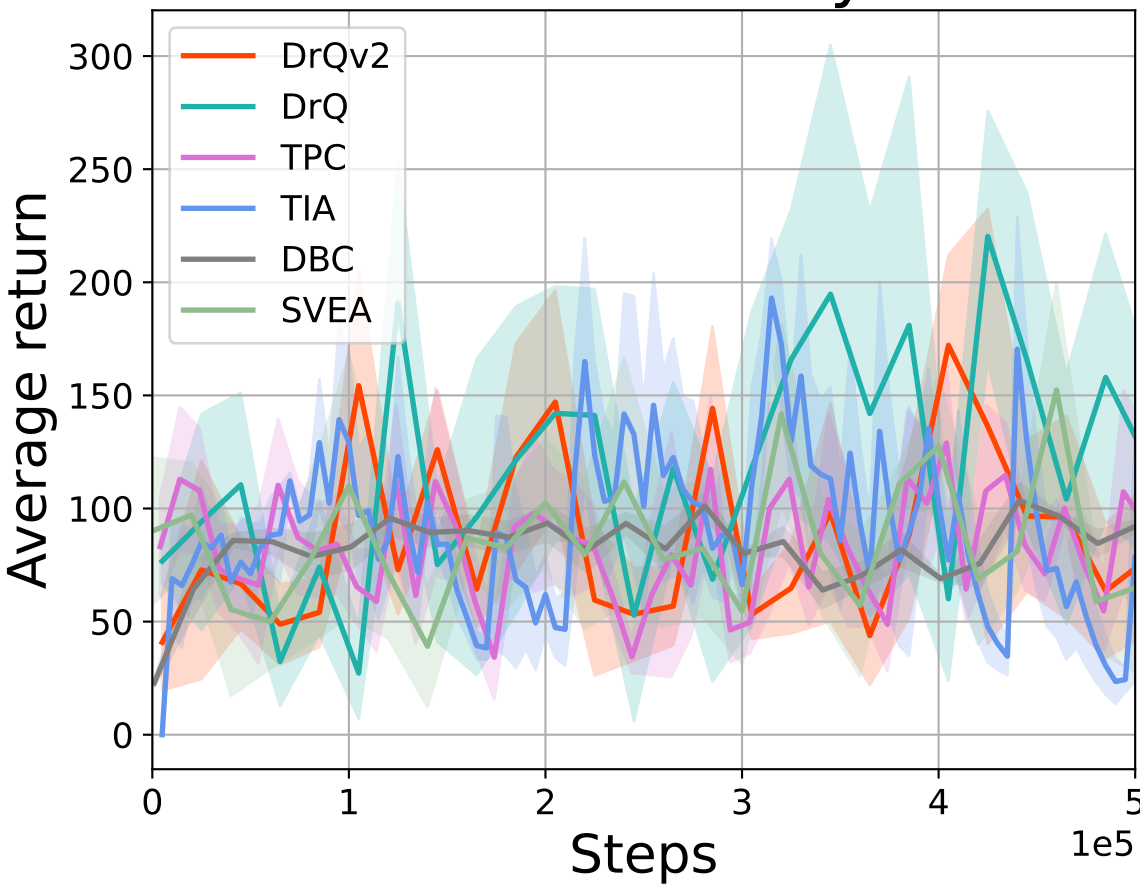

Ball in Cup Catch

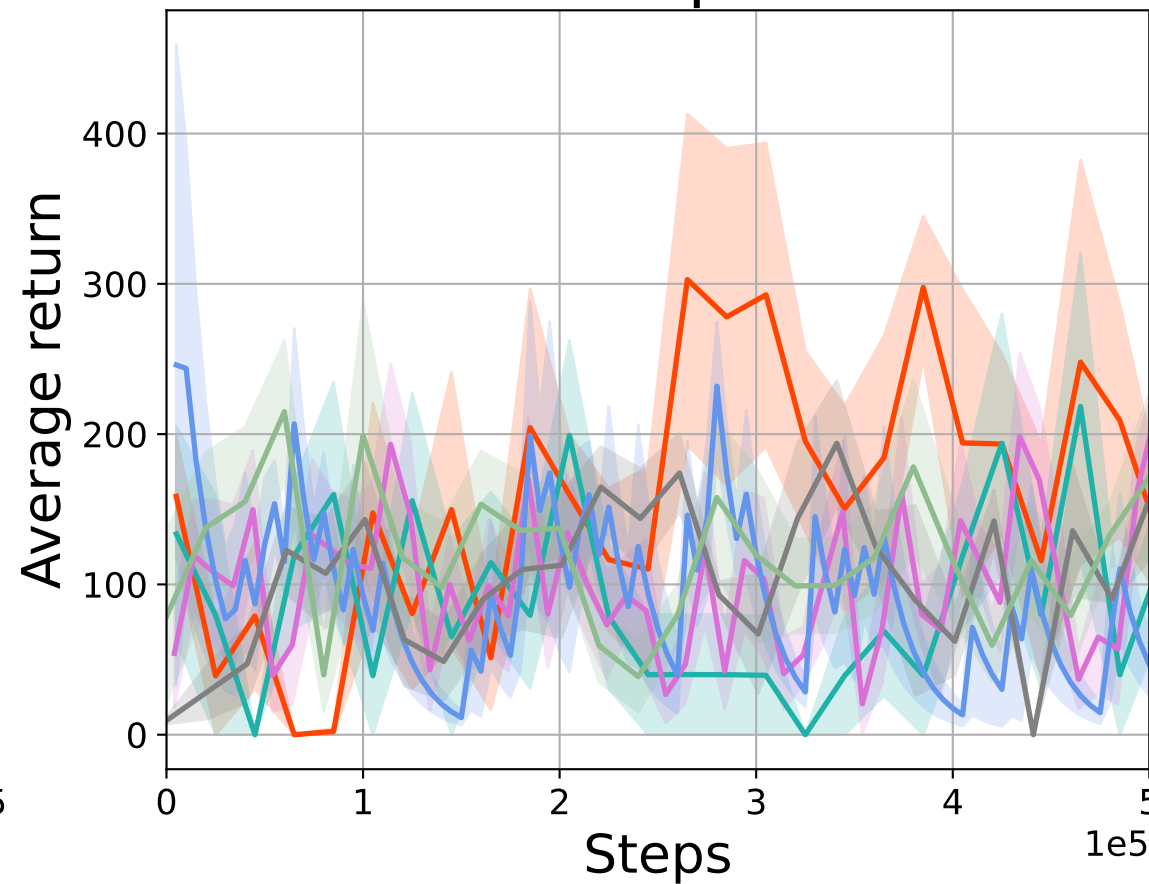

Walker Walk

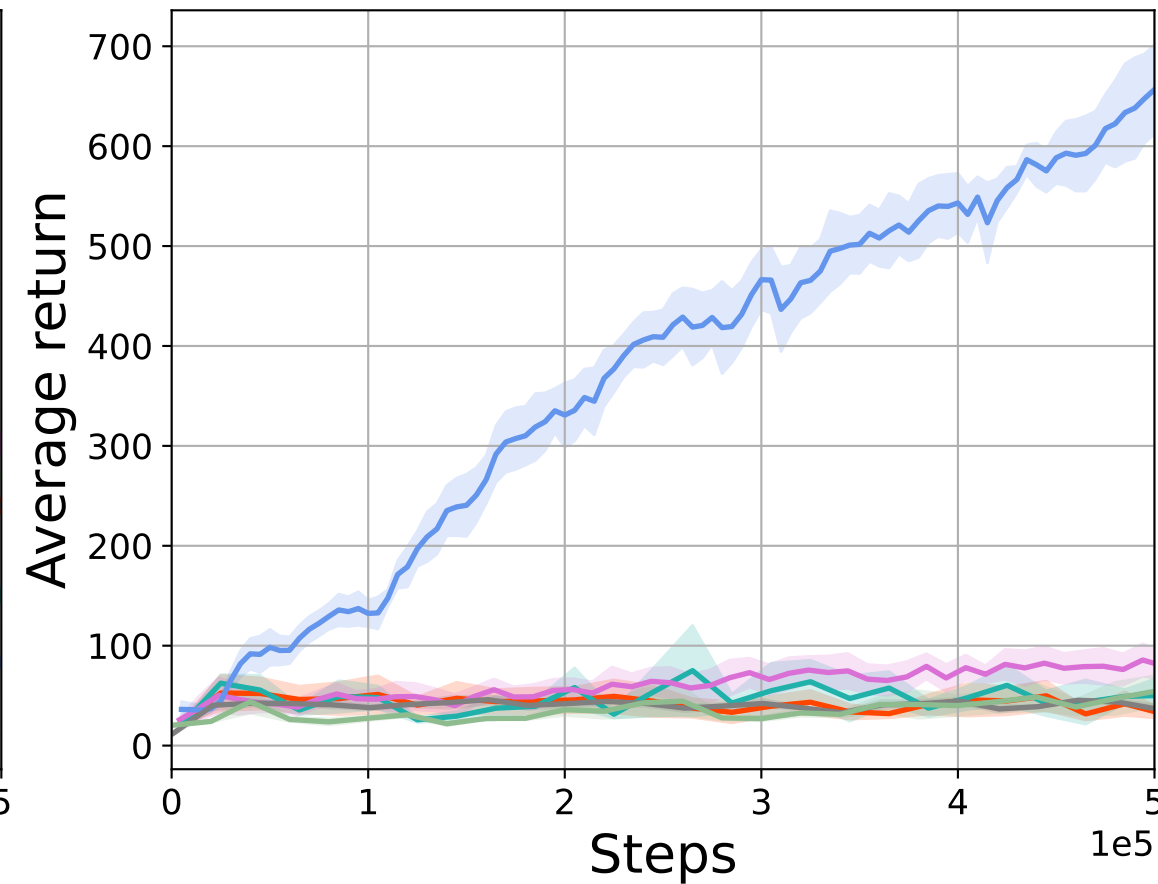

Cartpole Swingup

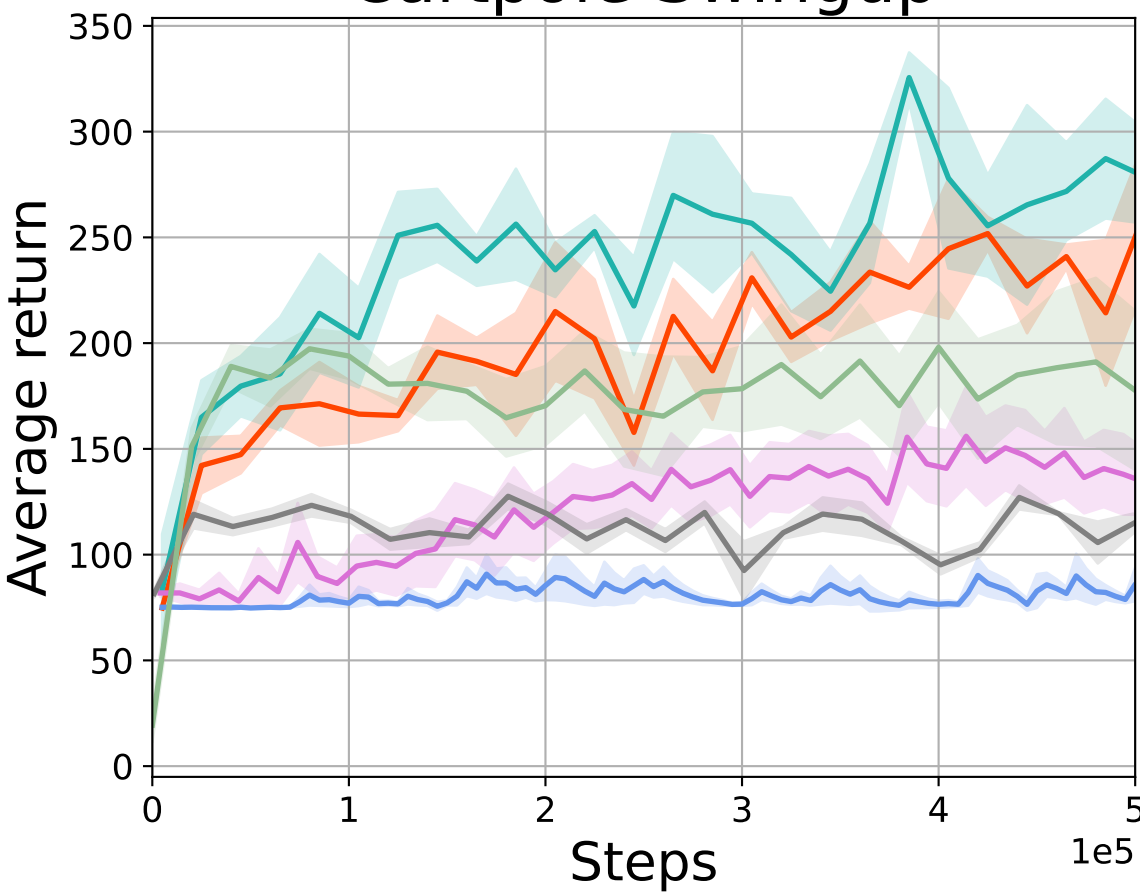

Finger Spin

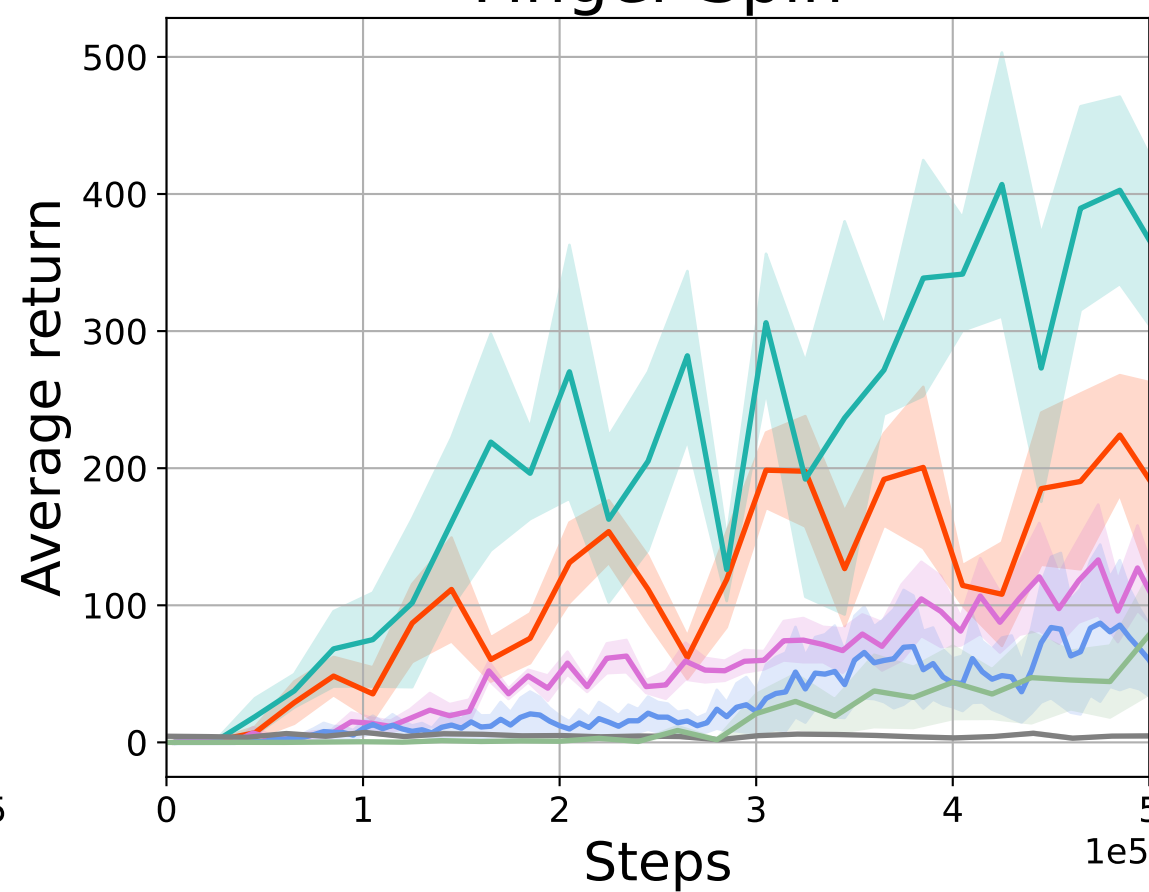

Cheetah Run

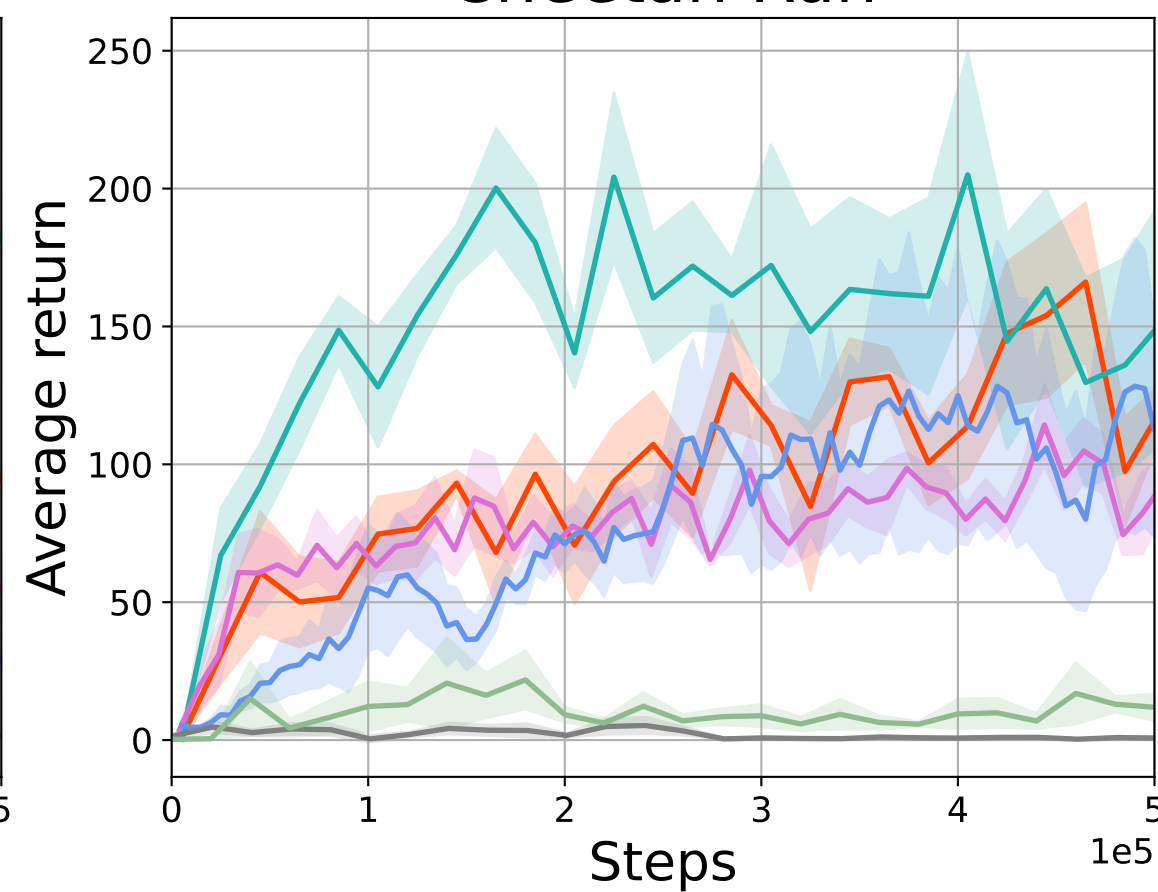

Supplement: supplementary_material [file attachment]

# Cheetah Run

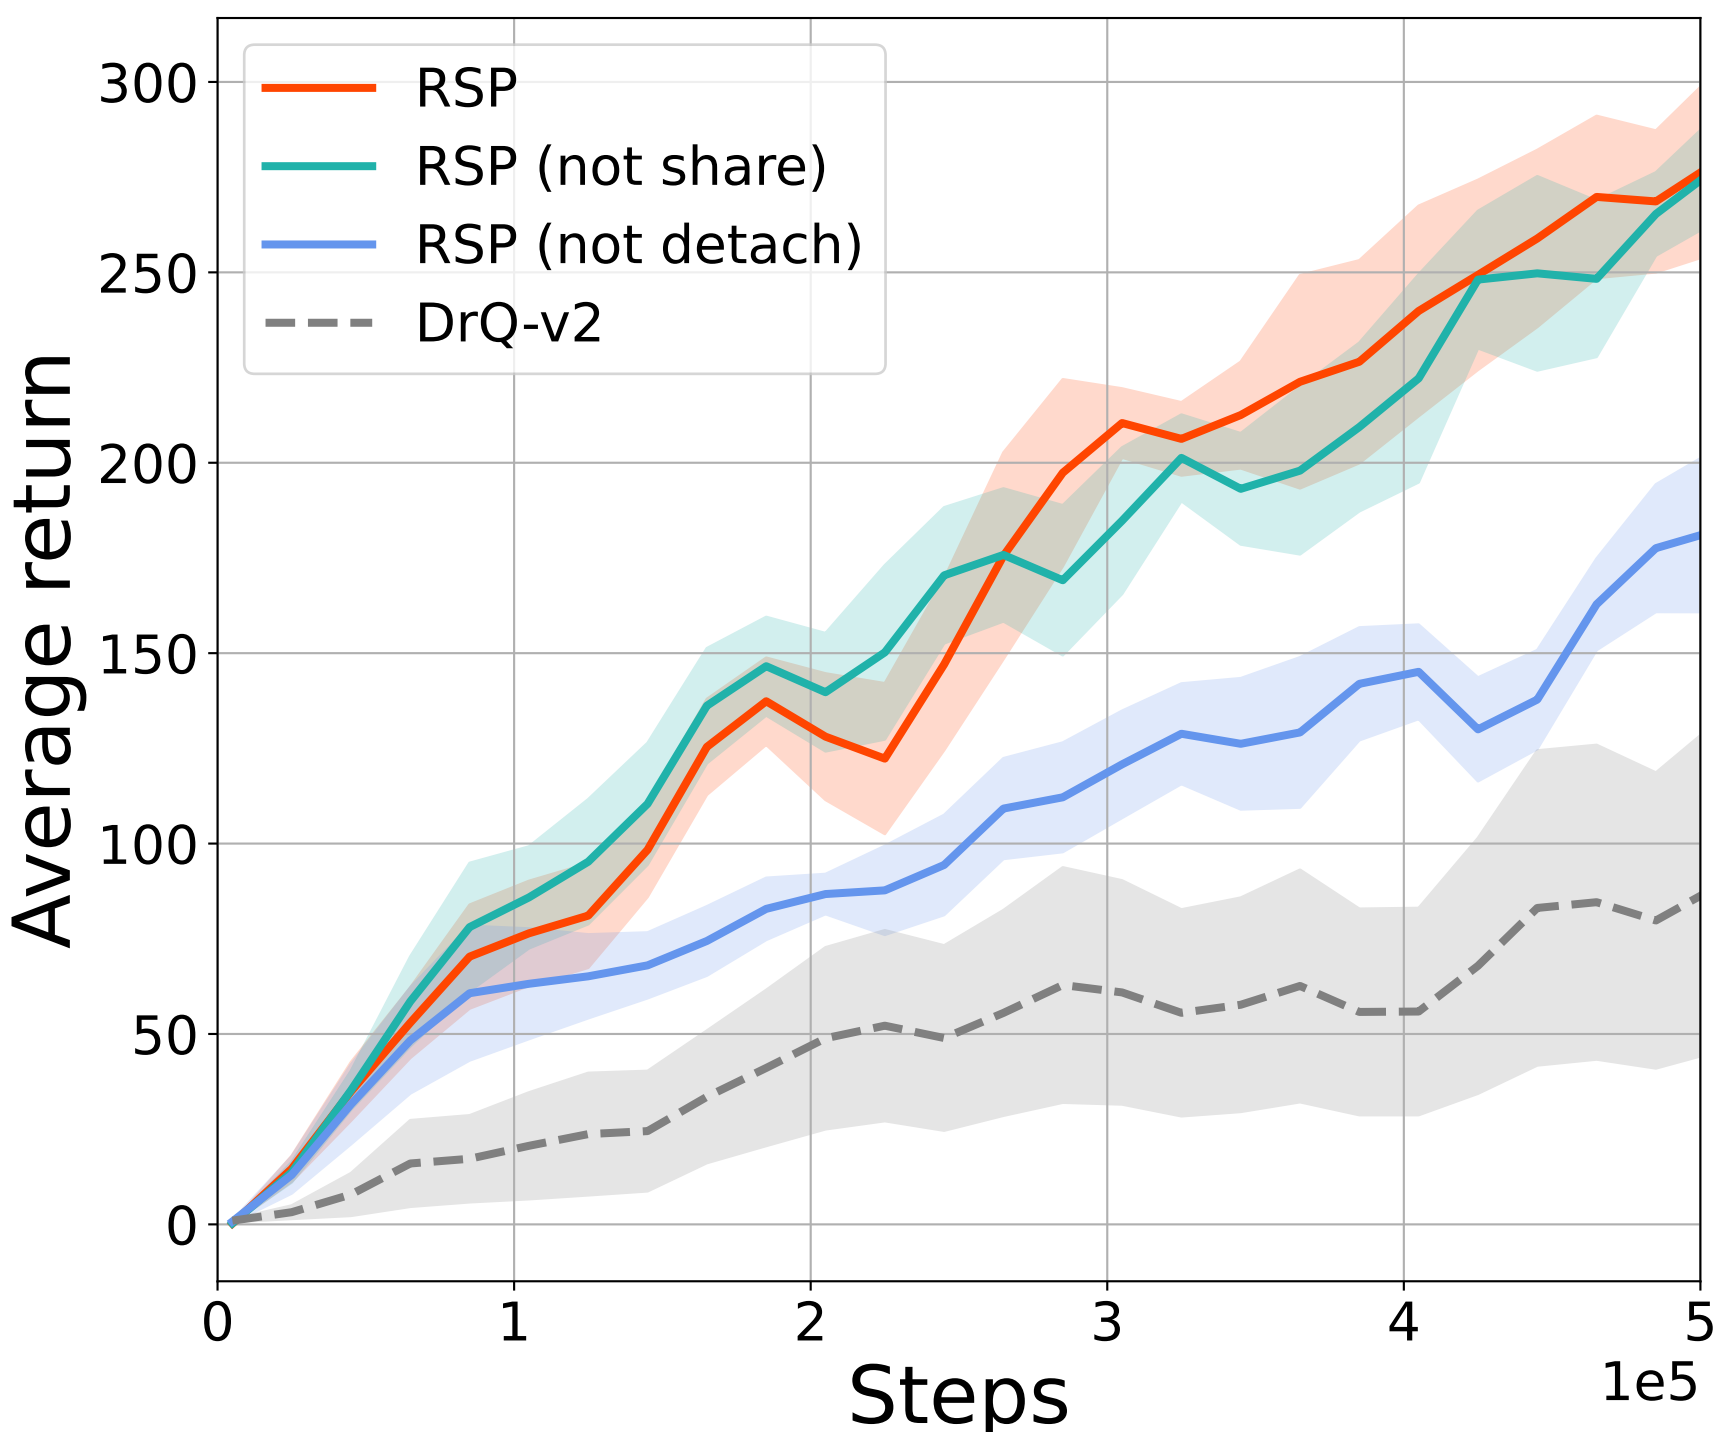

# Reacher Easy

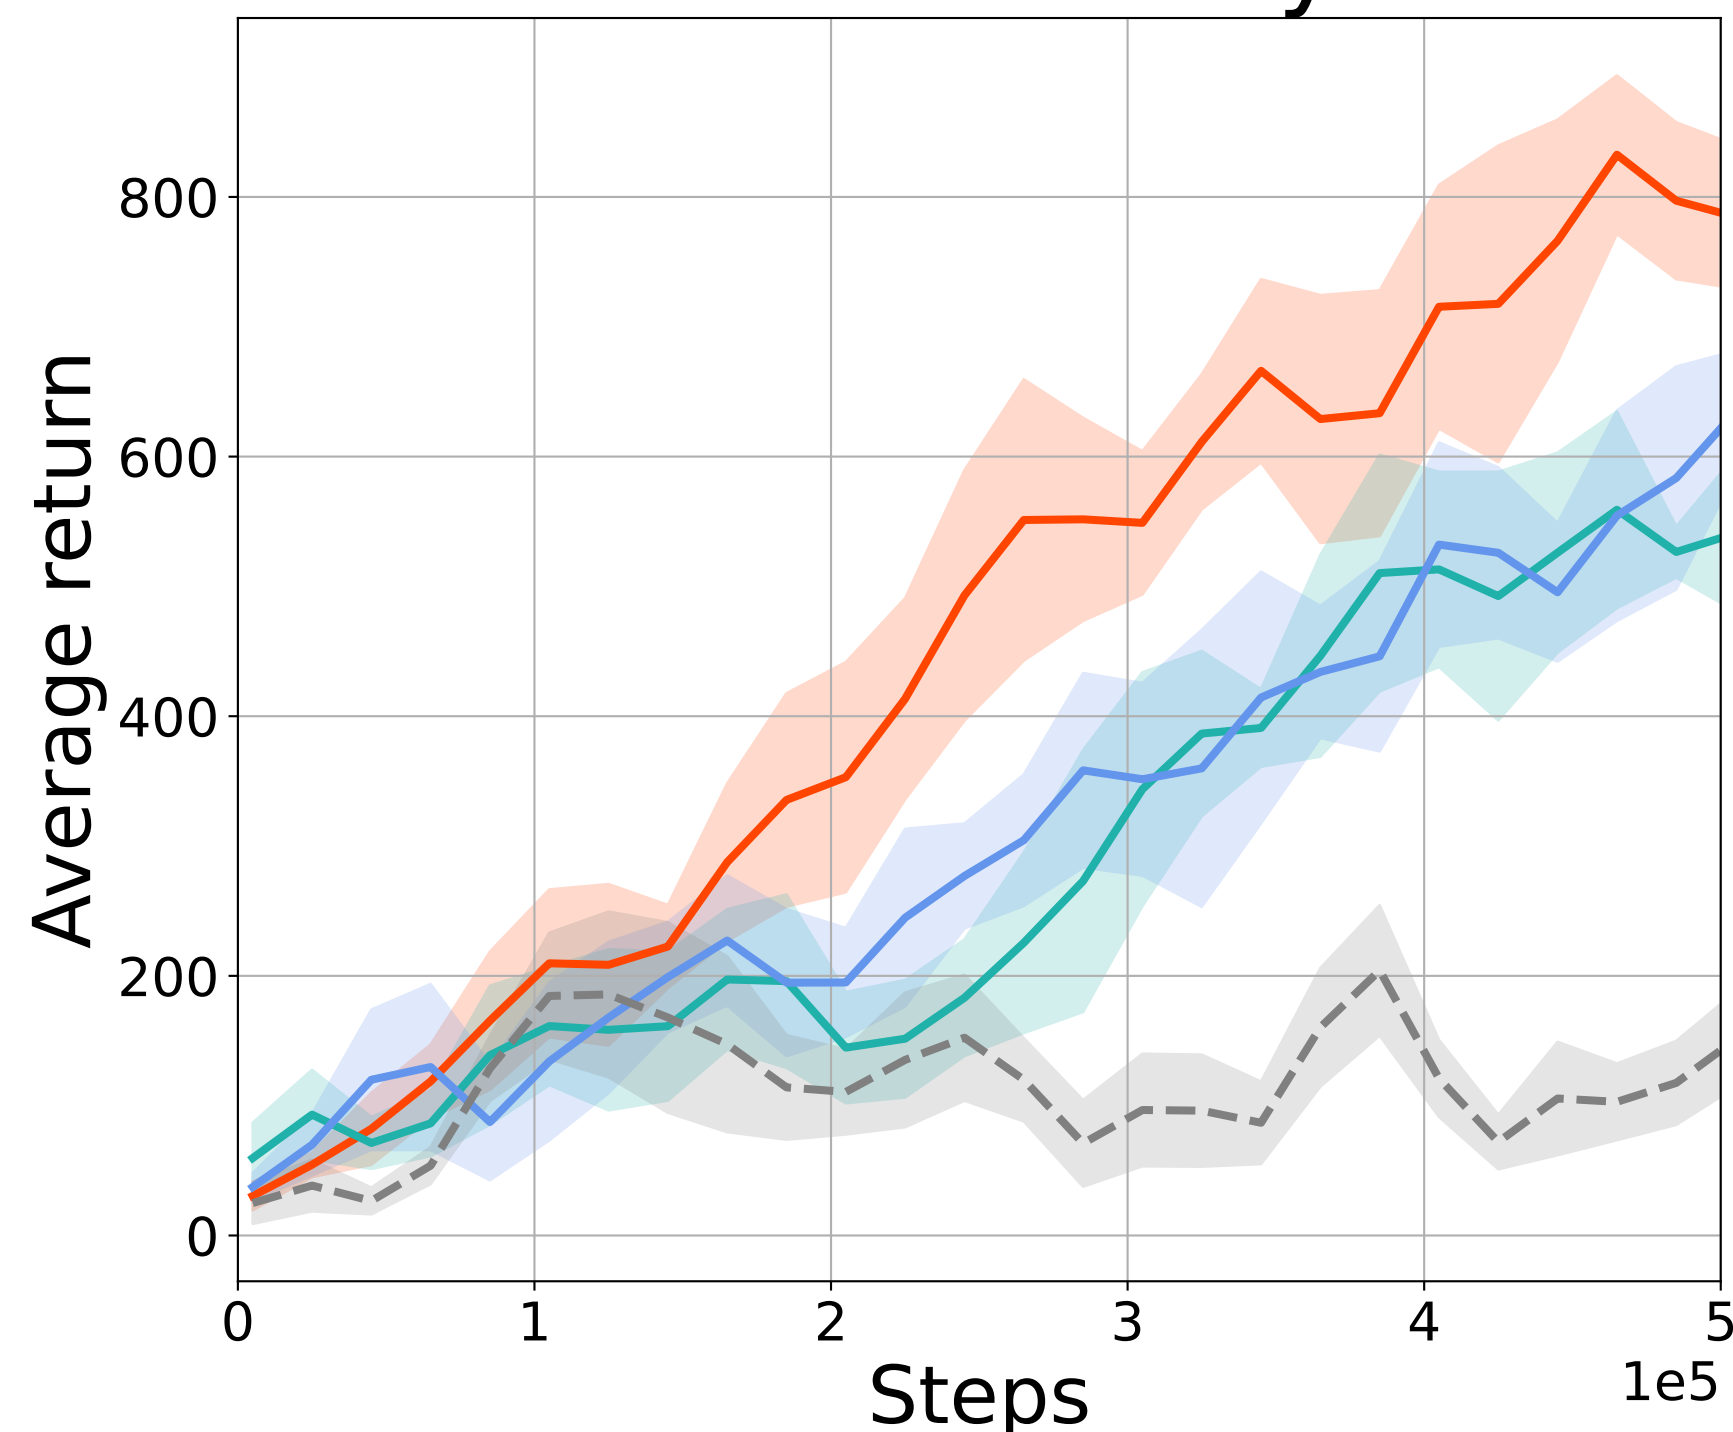

# Cartpole Swingup

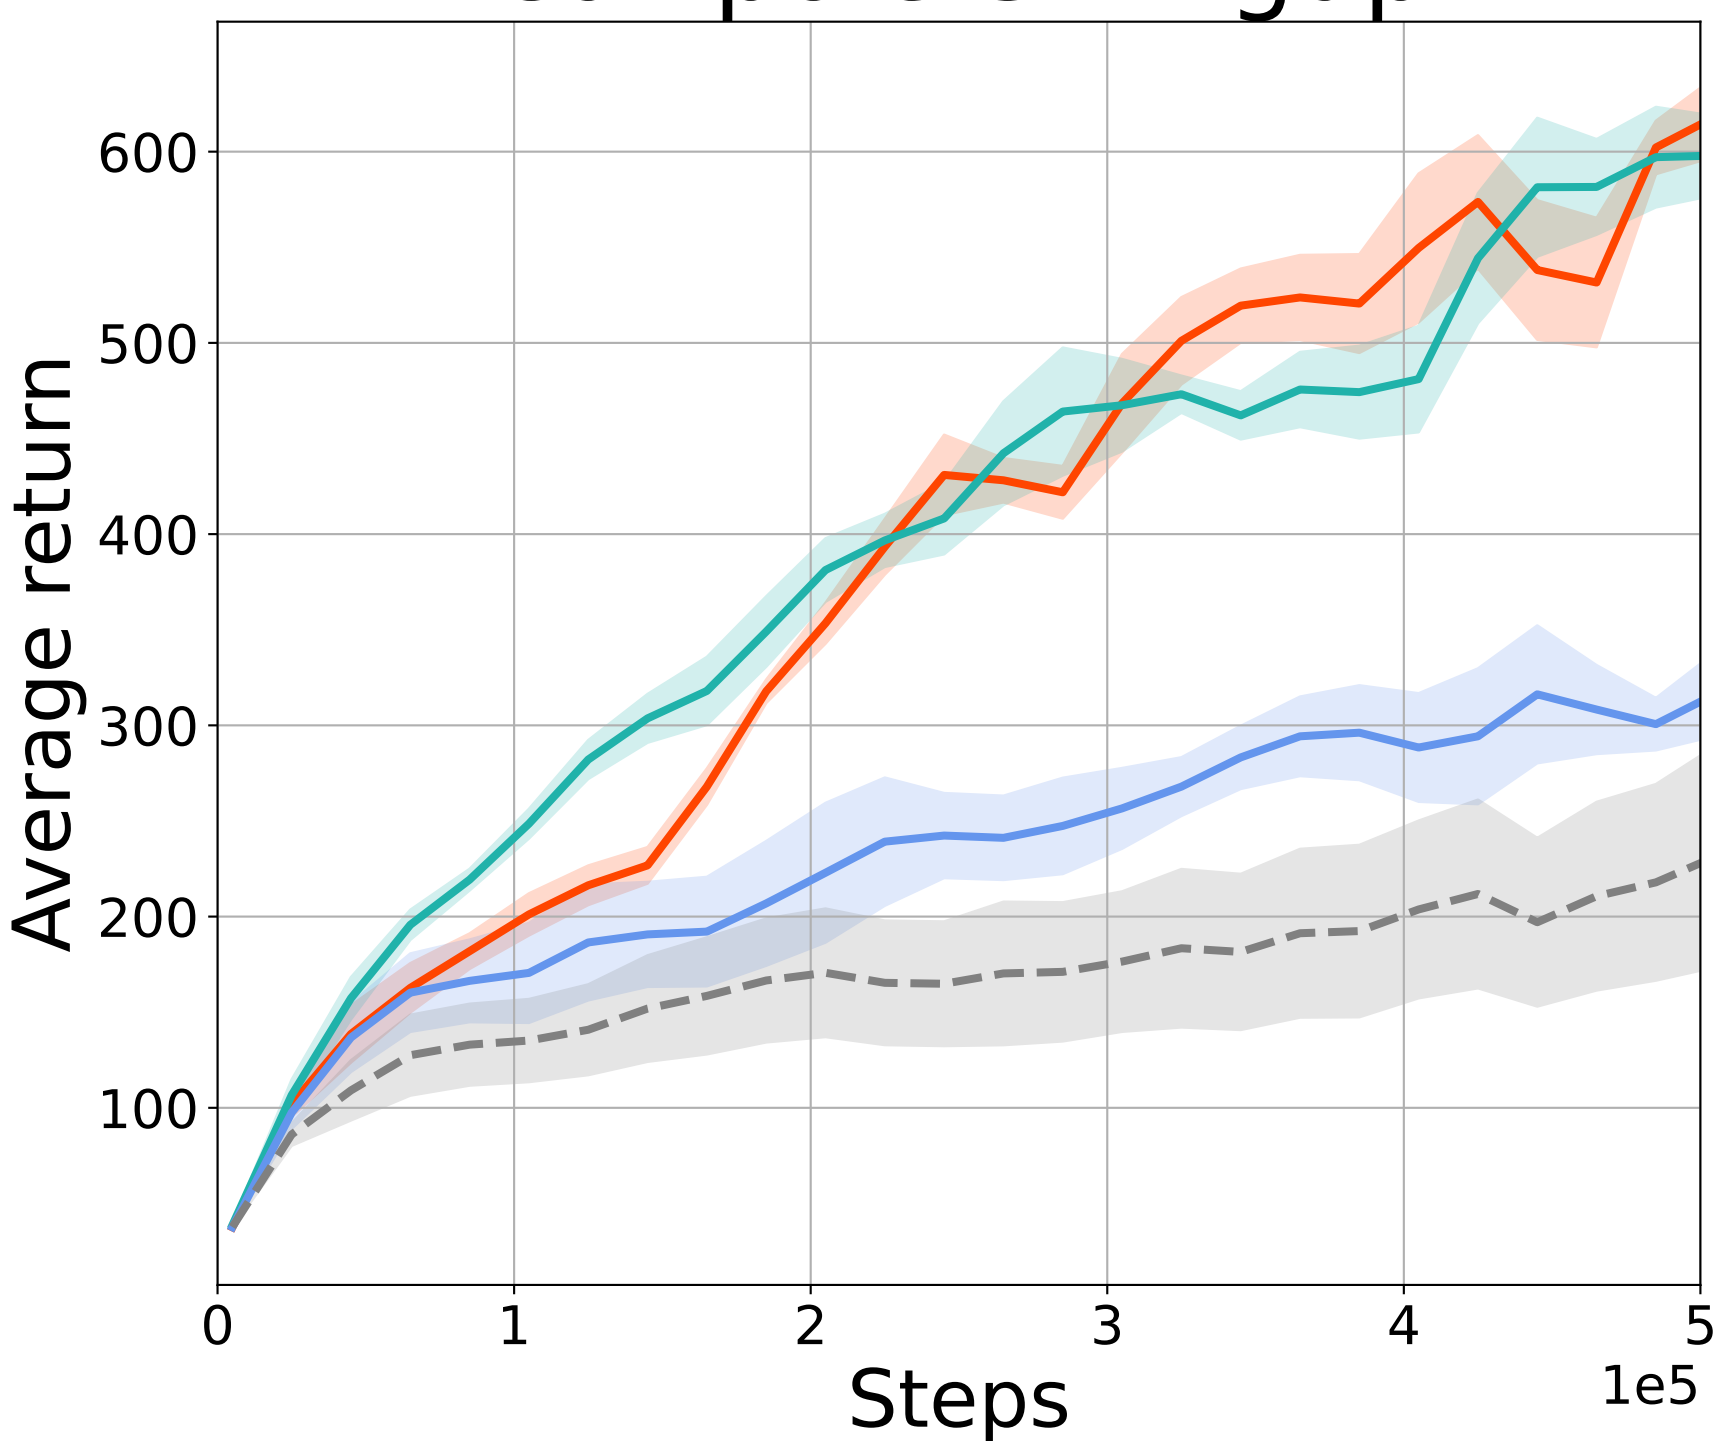

# Ball in Cup Catch

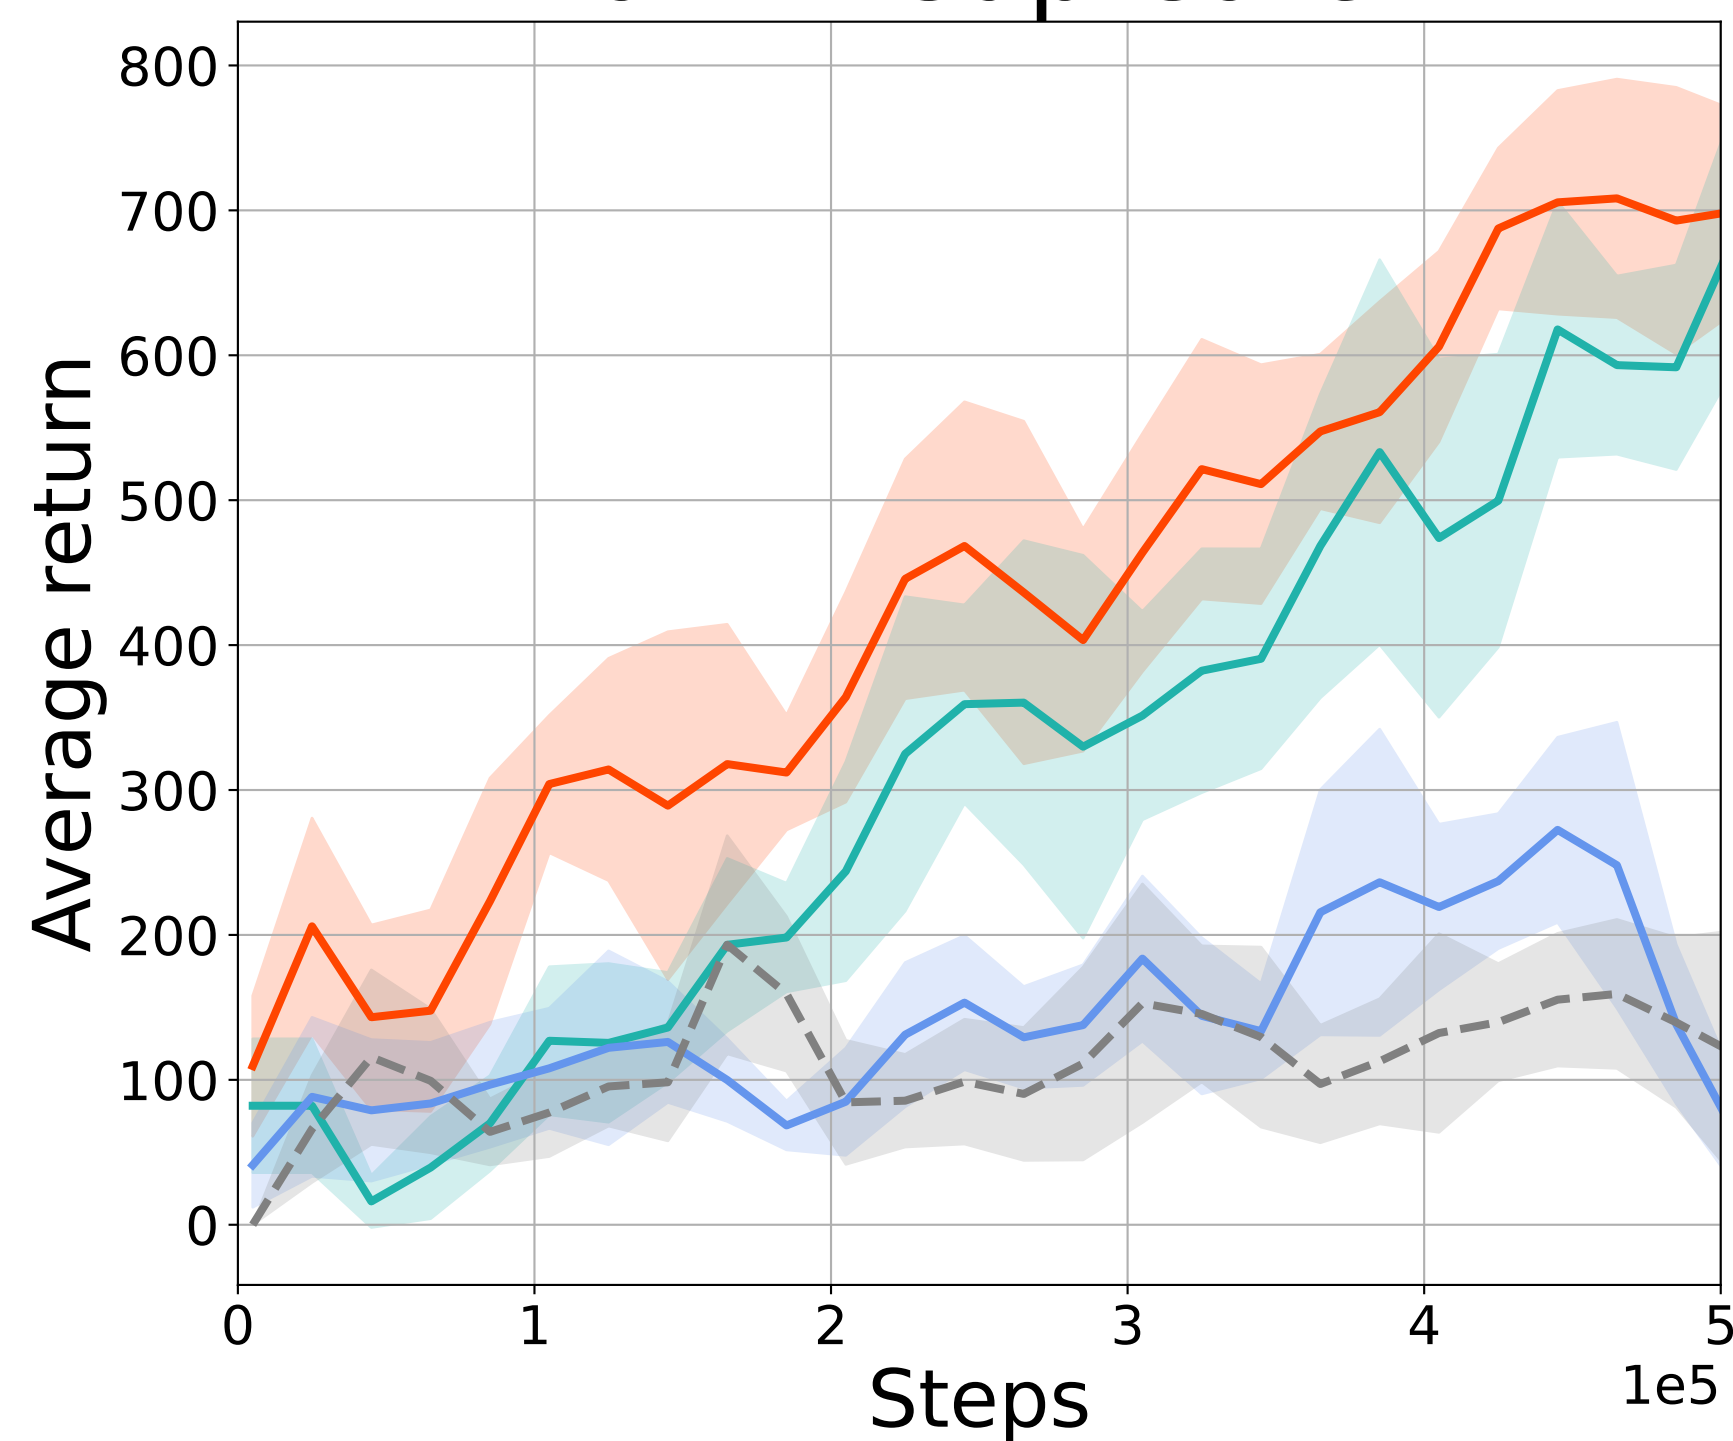

Supplement: supplementary_material [file attachment]

Reacher Easy

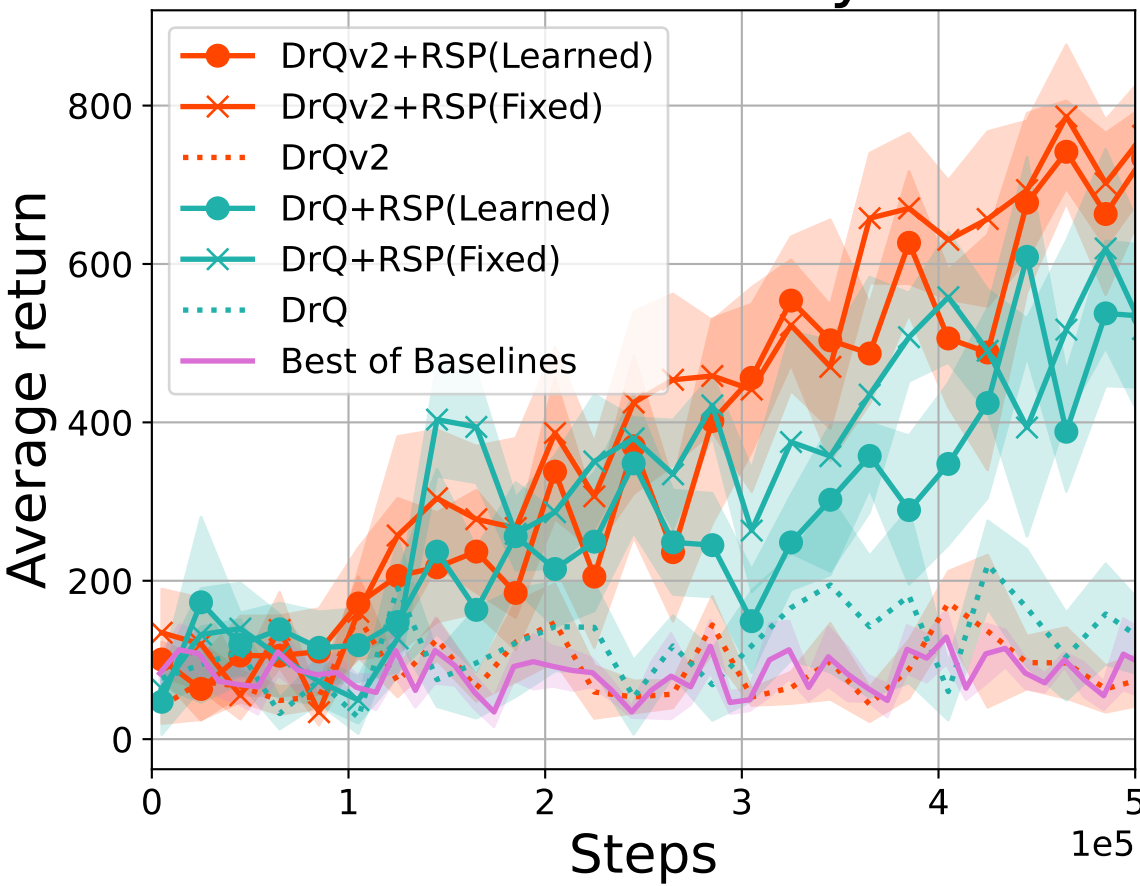

Ball in Cup Catch

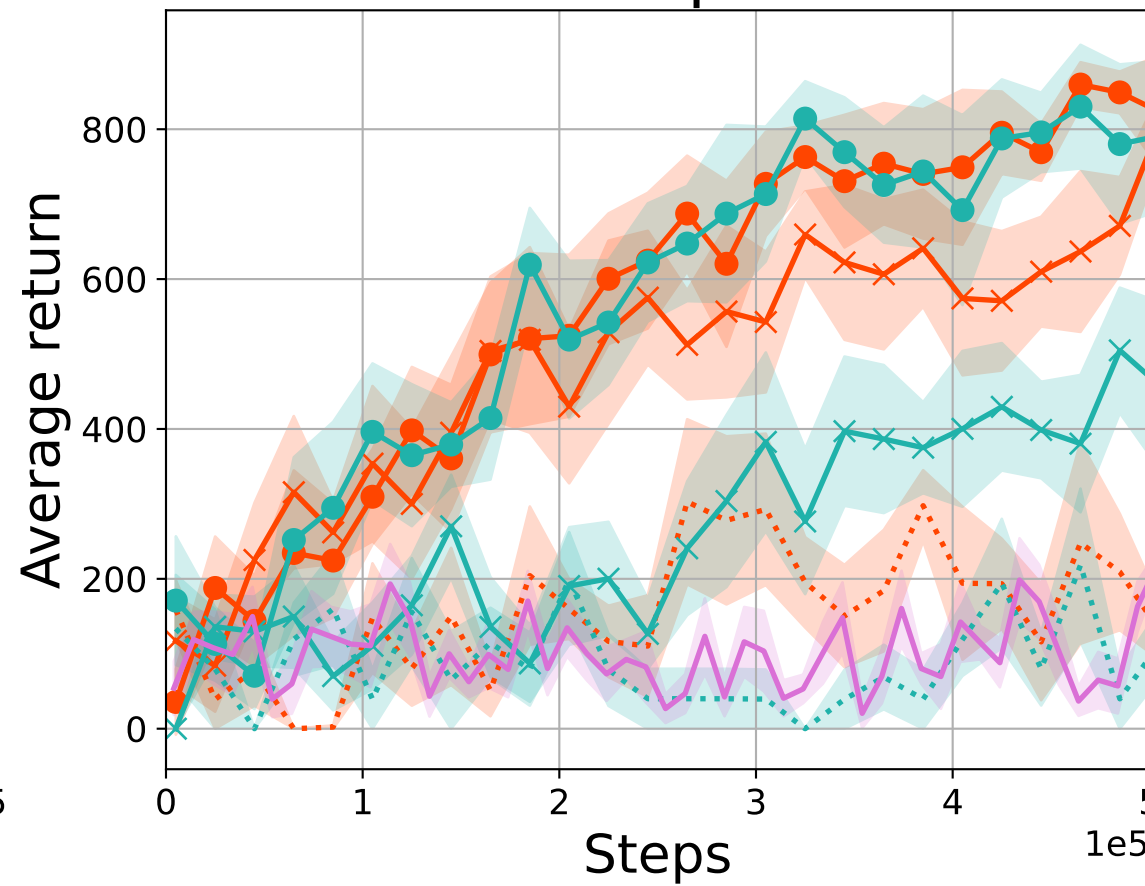

Walker Walk

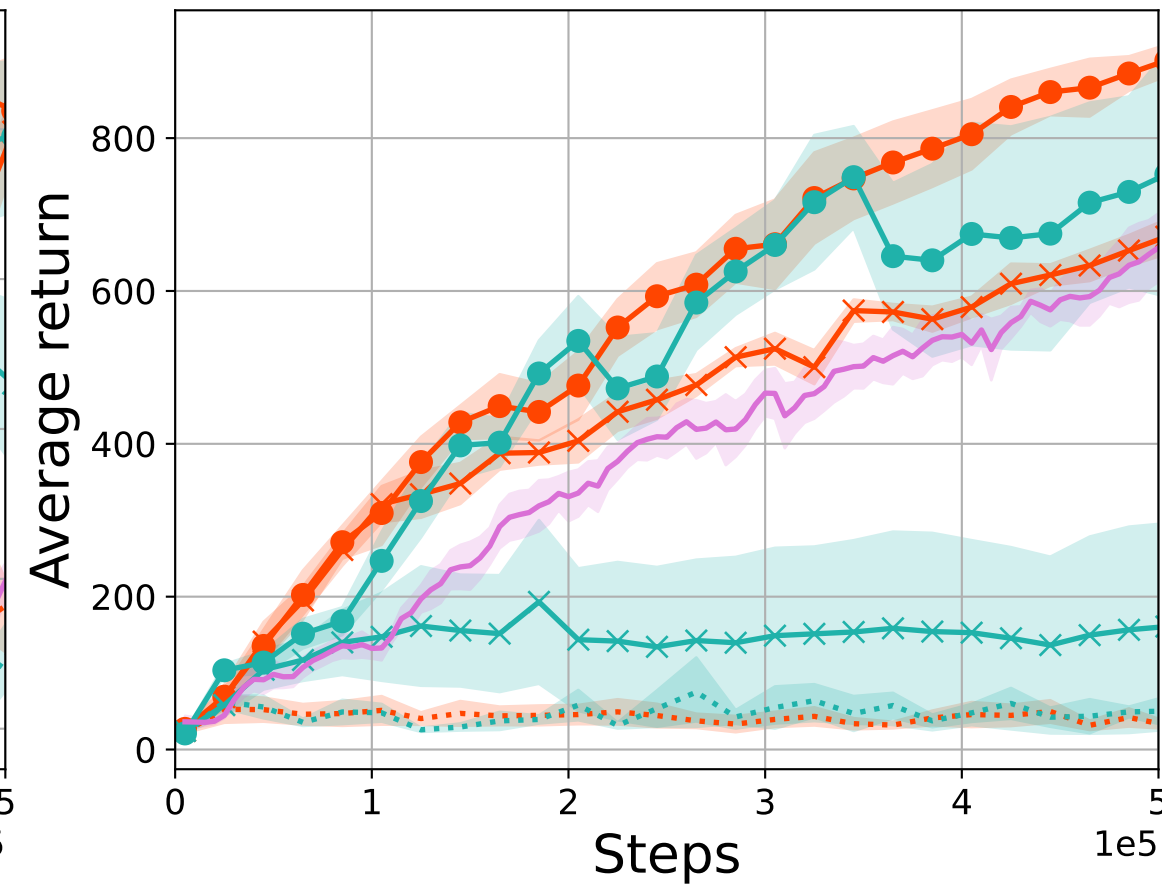

Cartpole Swingup

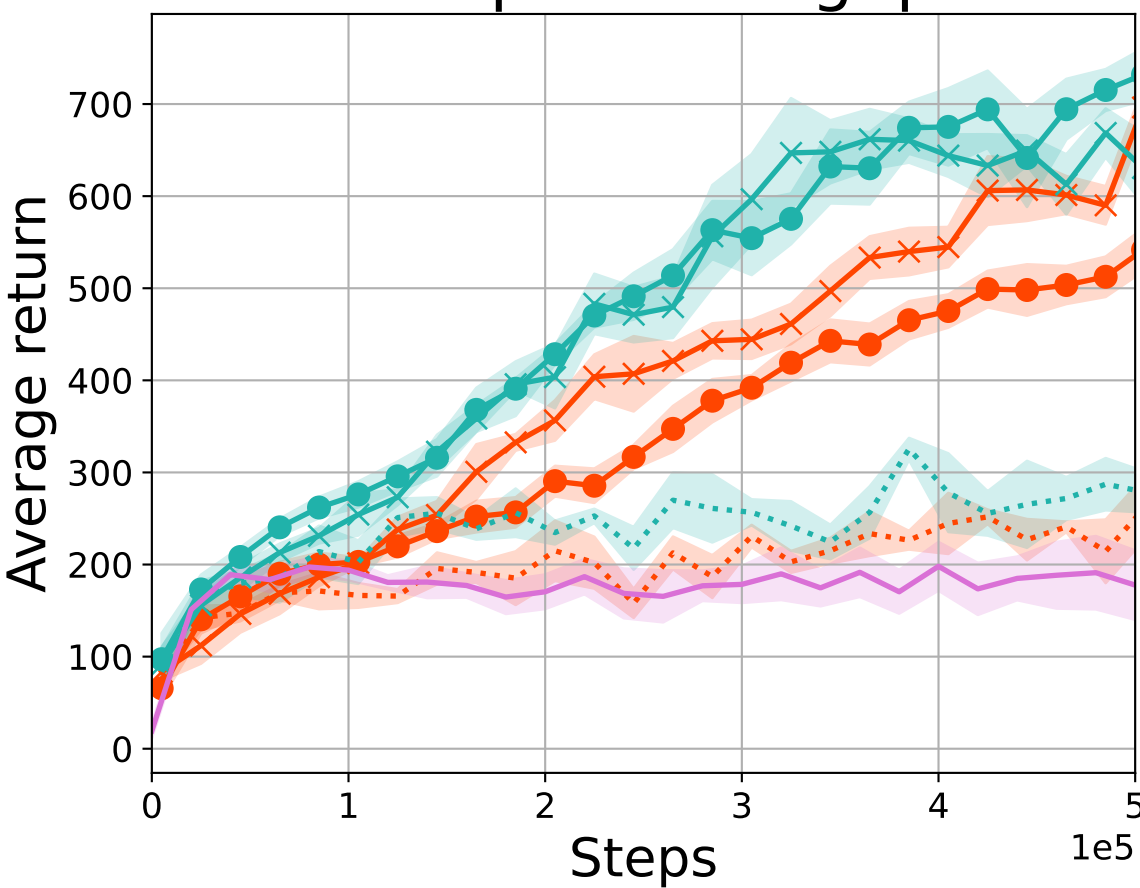

Finger Spin

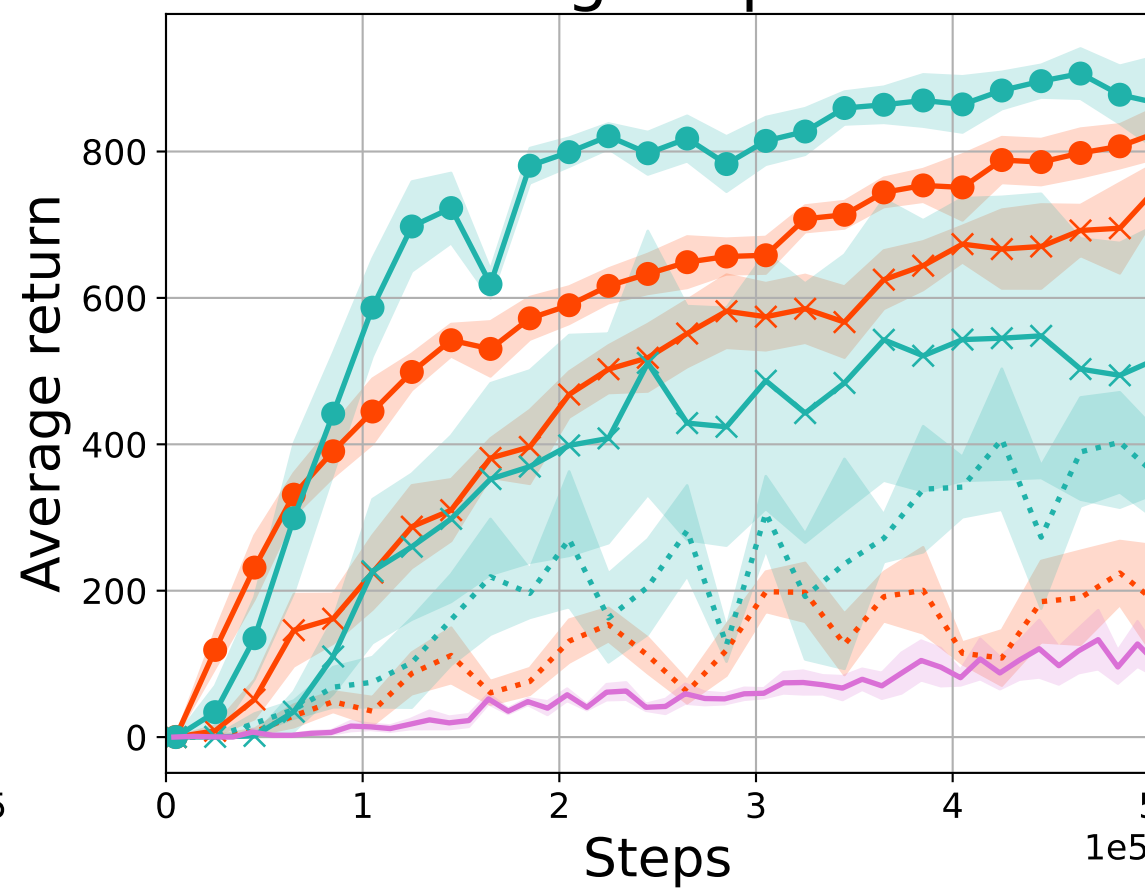

Cheetah Run

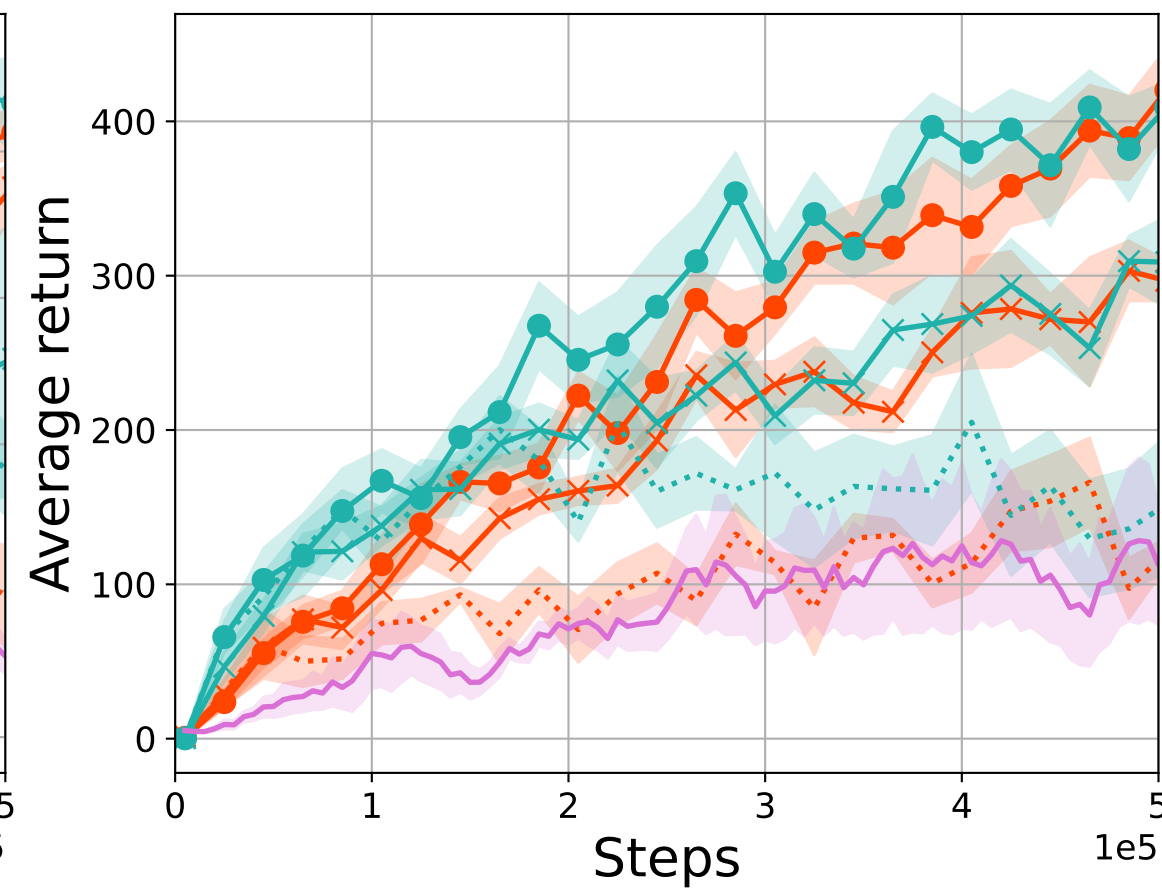

Supplement: supplementary_material [file attachment]

# State

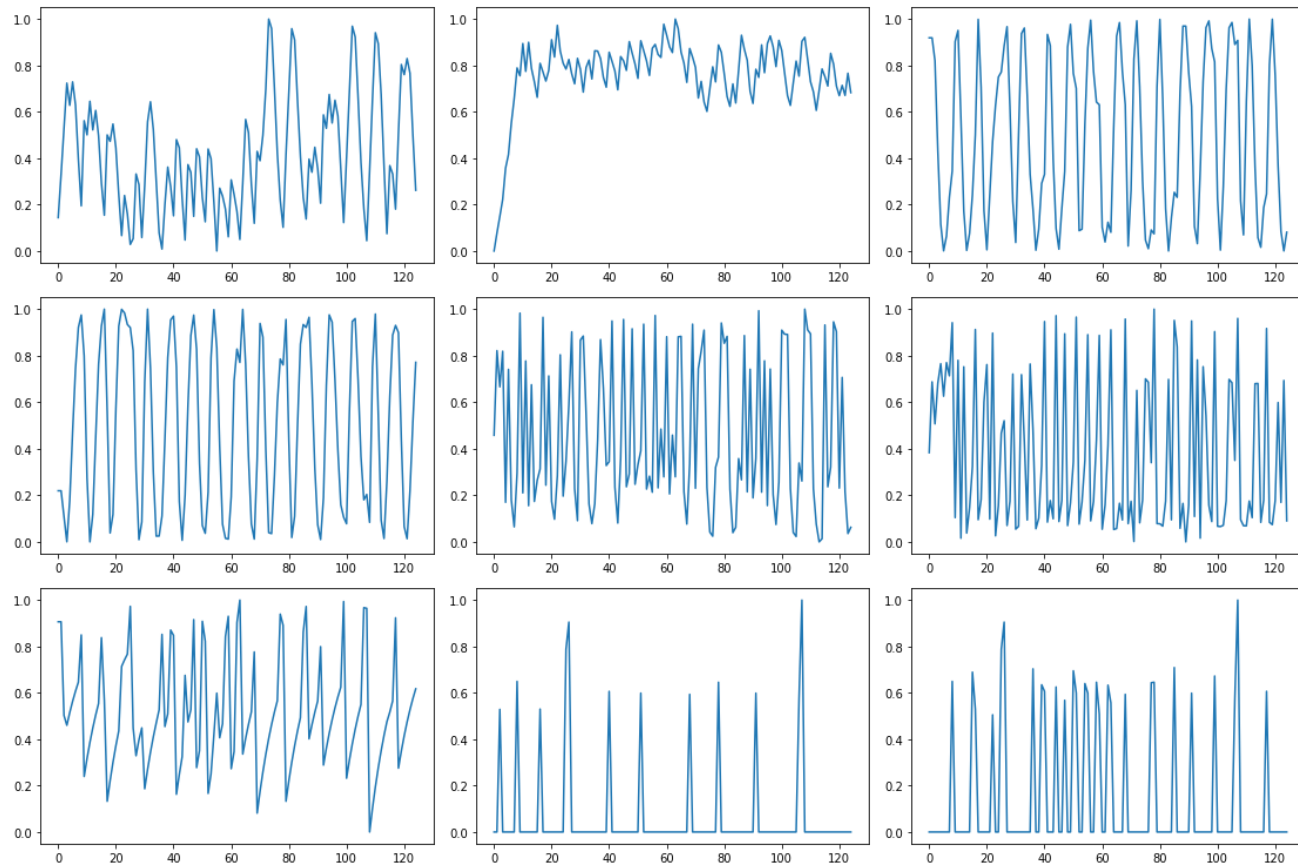

# Reward

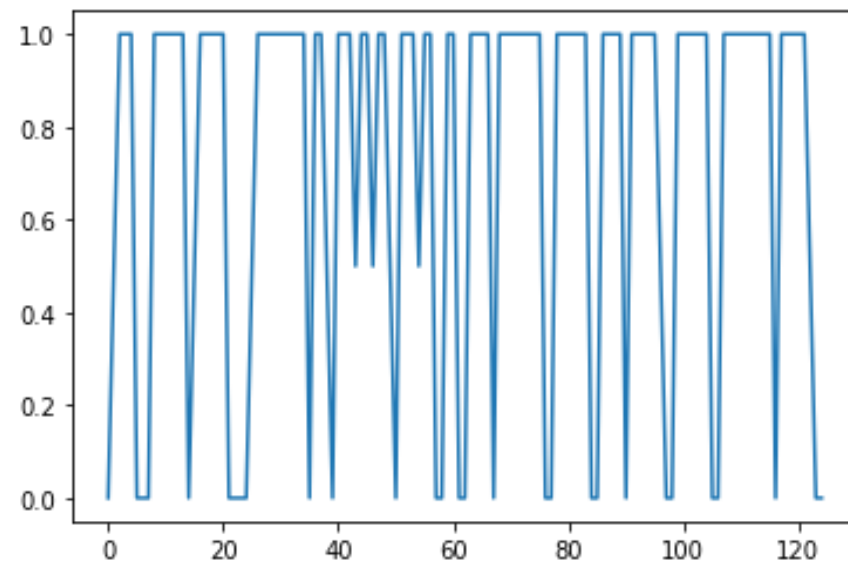

Supplement: supplementary_material [file attachment]

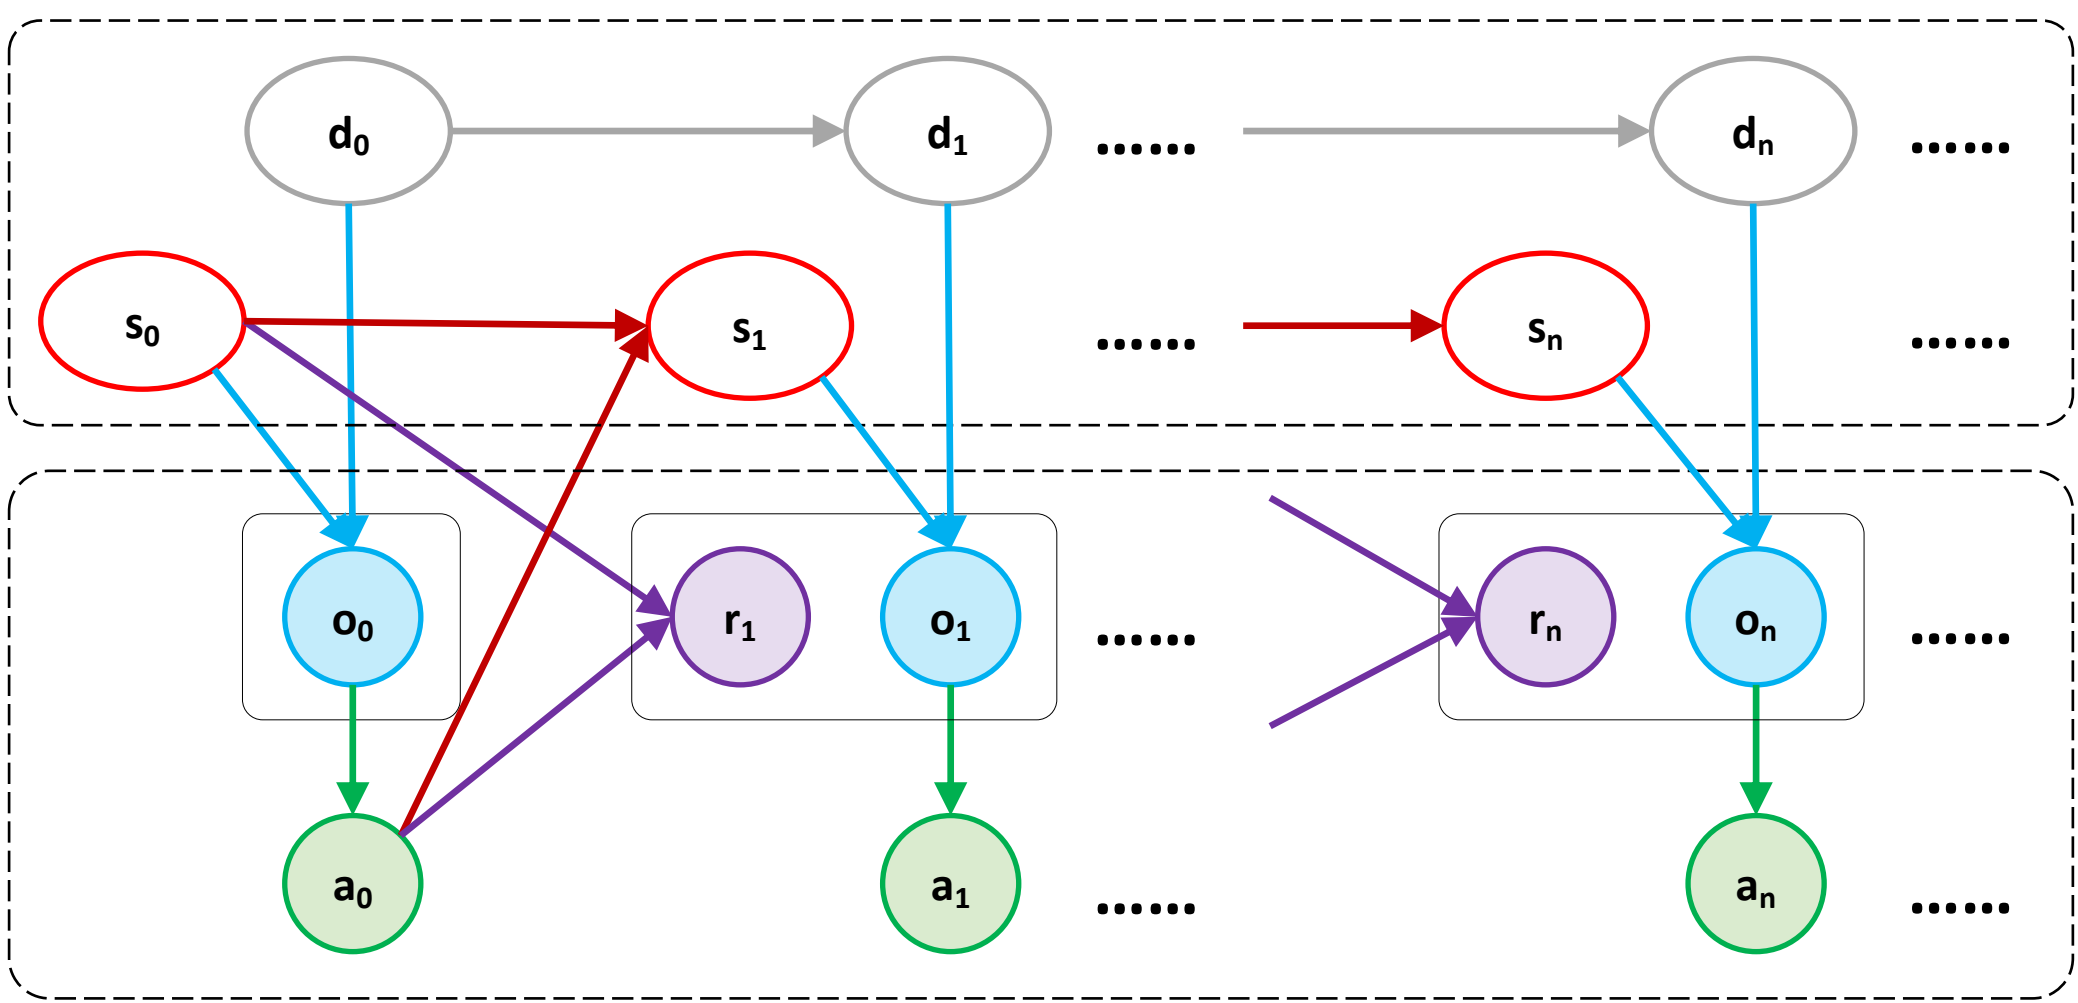

Supplement: supplementary_material [file attachment]

# Observations

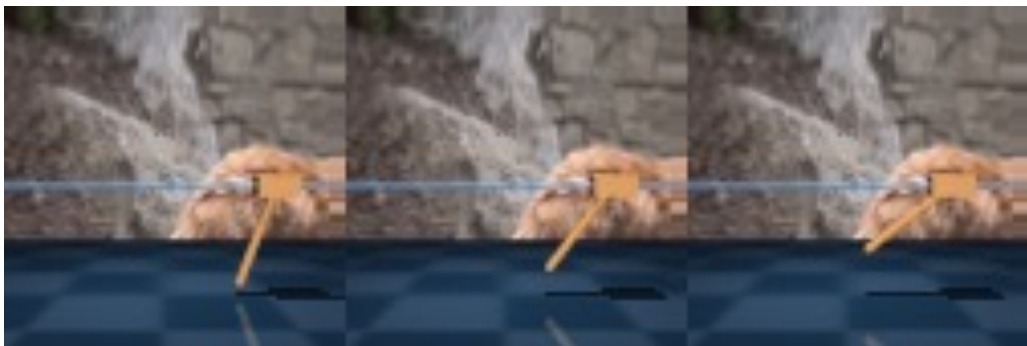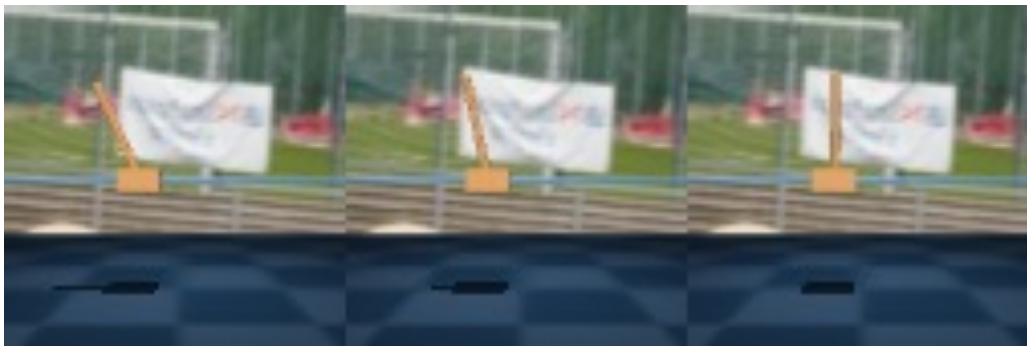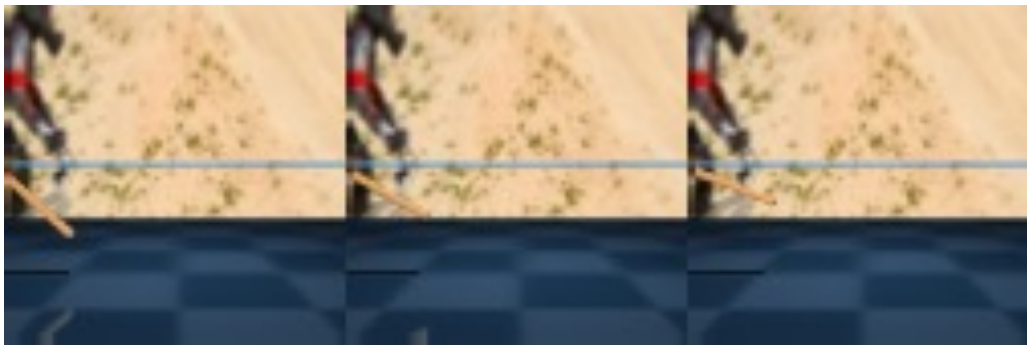

# Reconstruction

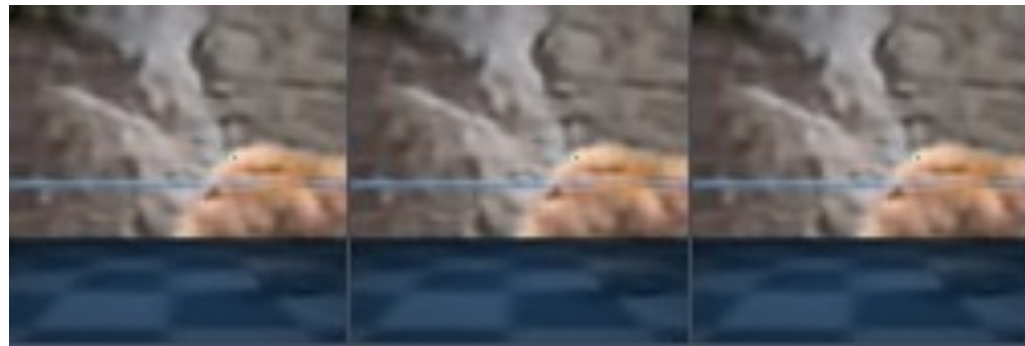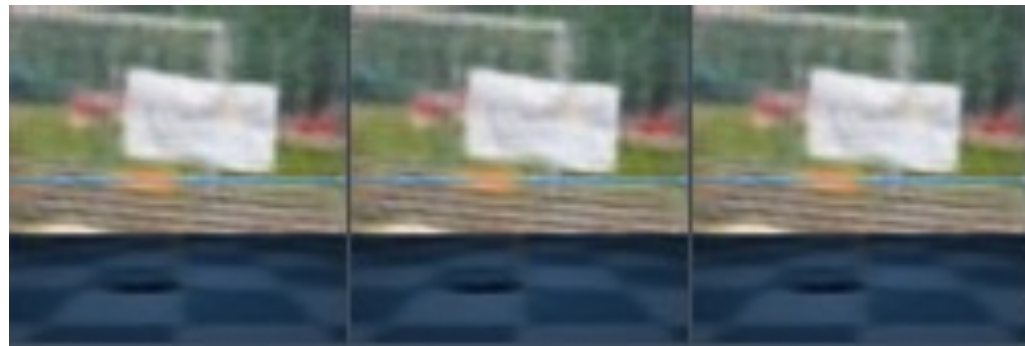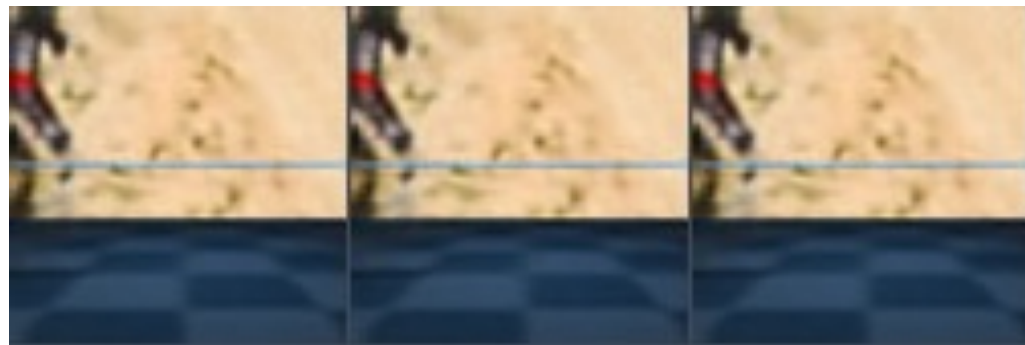

Supplement: supplementary_material [file attachment]

Cartpole Swingup

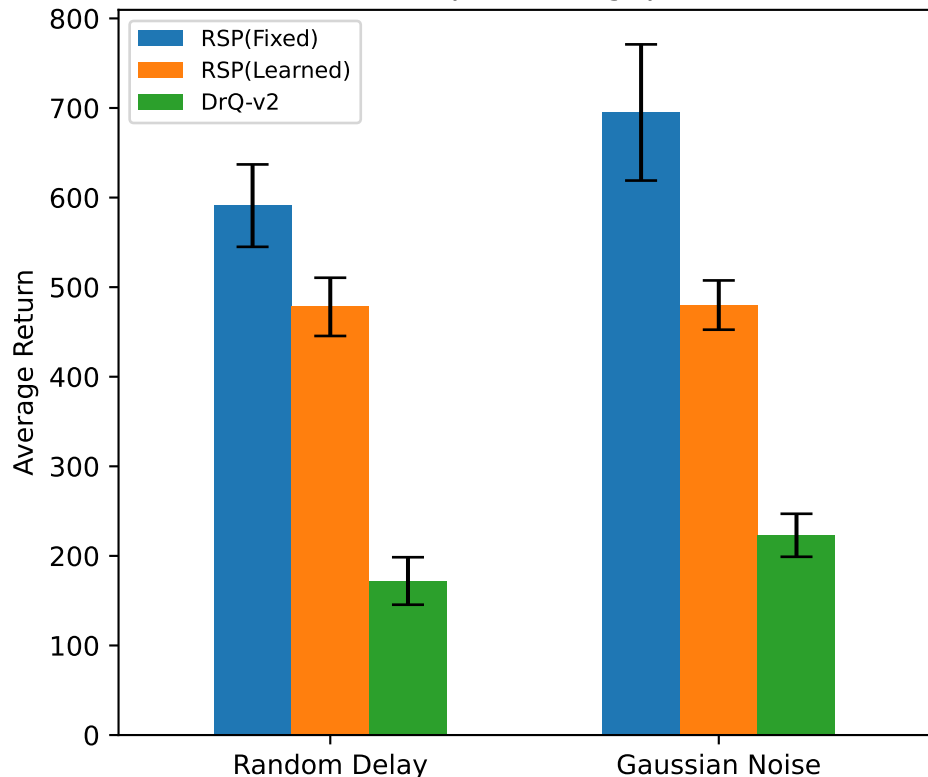

Reacher Easy

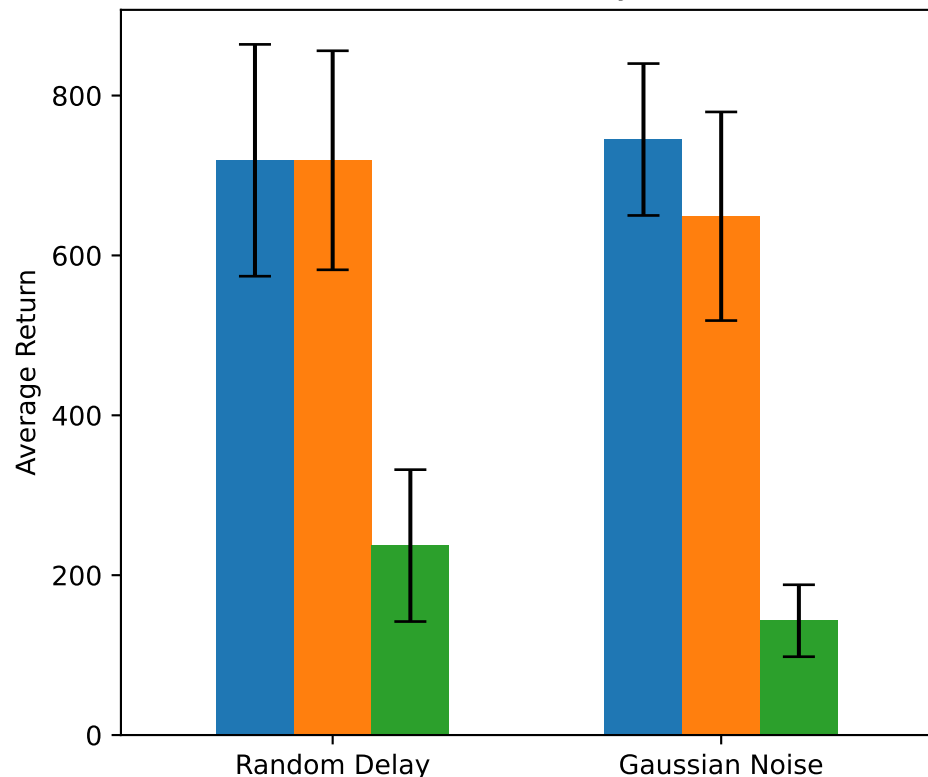

Supplement: supplementary_material [file attachment]

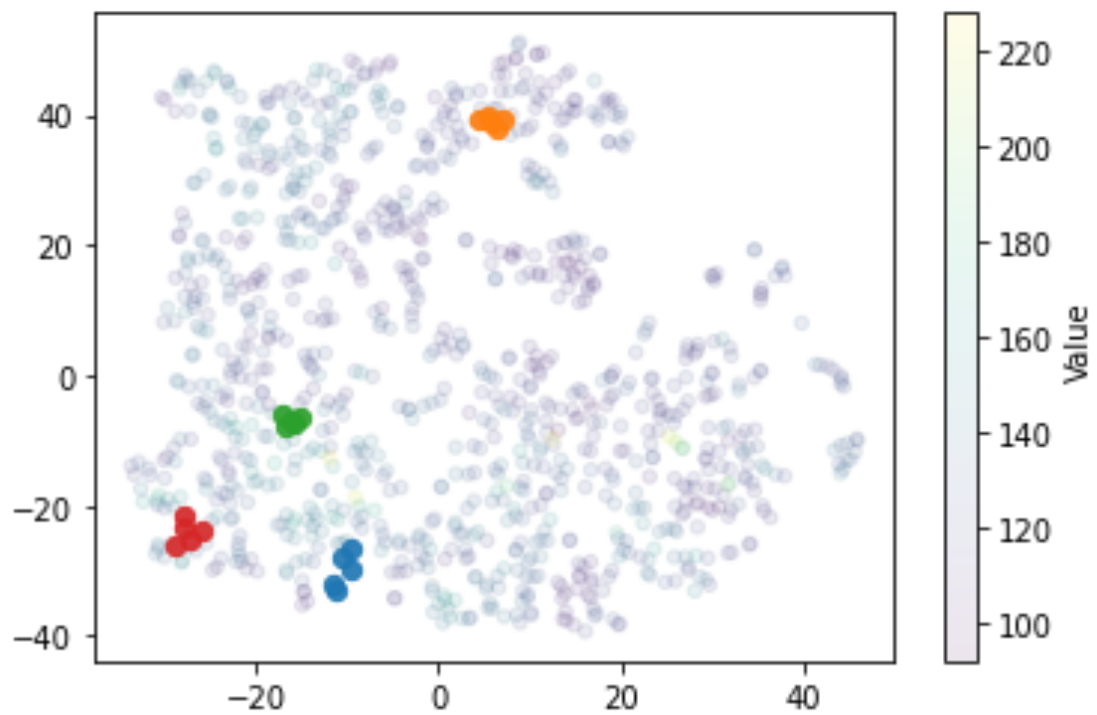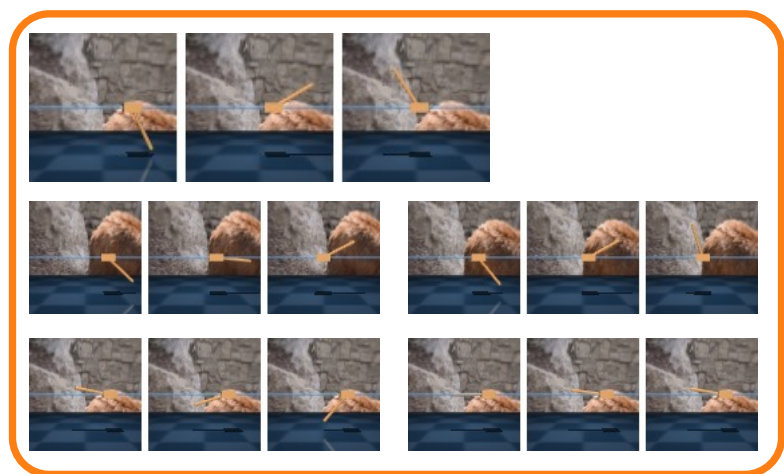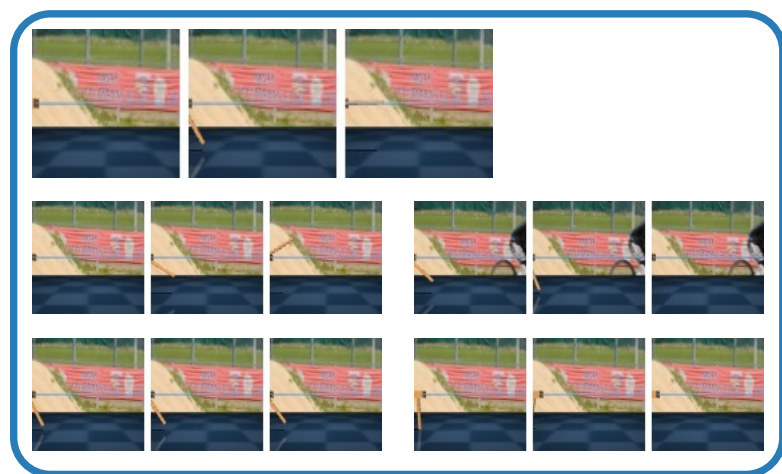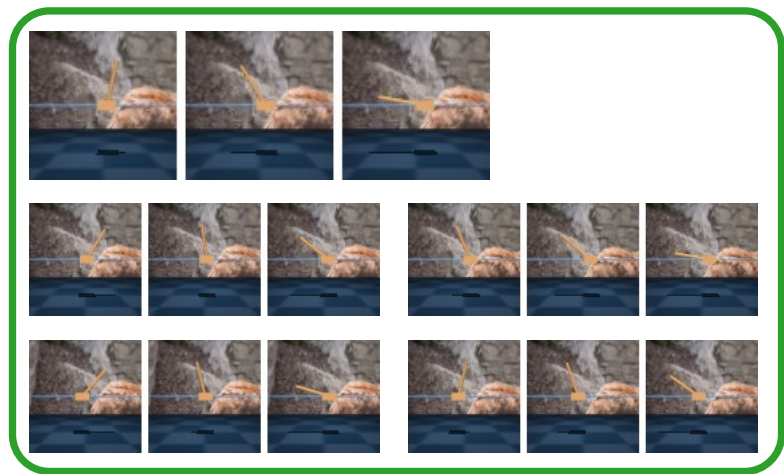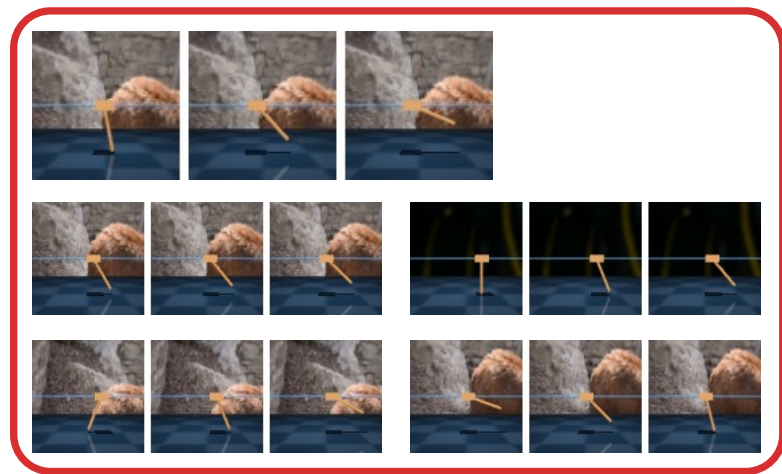

Supplement: supplementary_material [file attachment]

# Cheetah Run

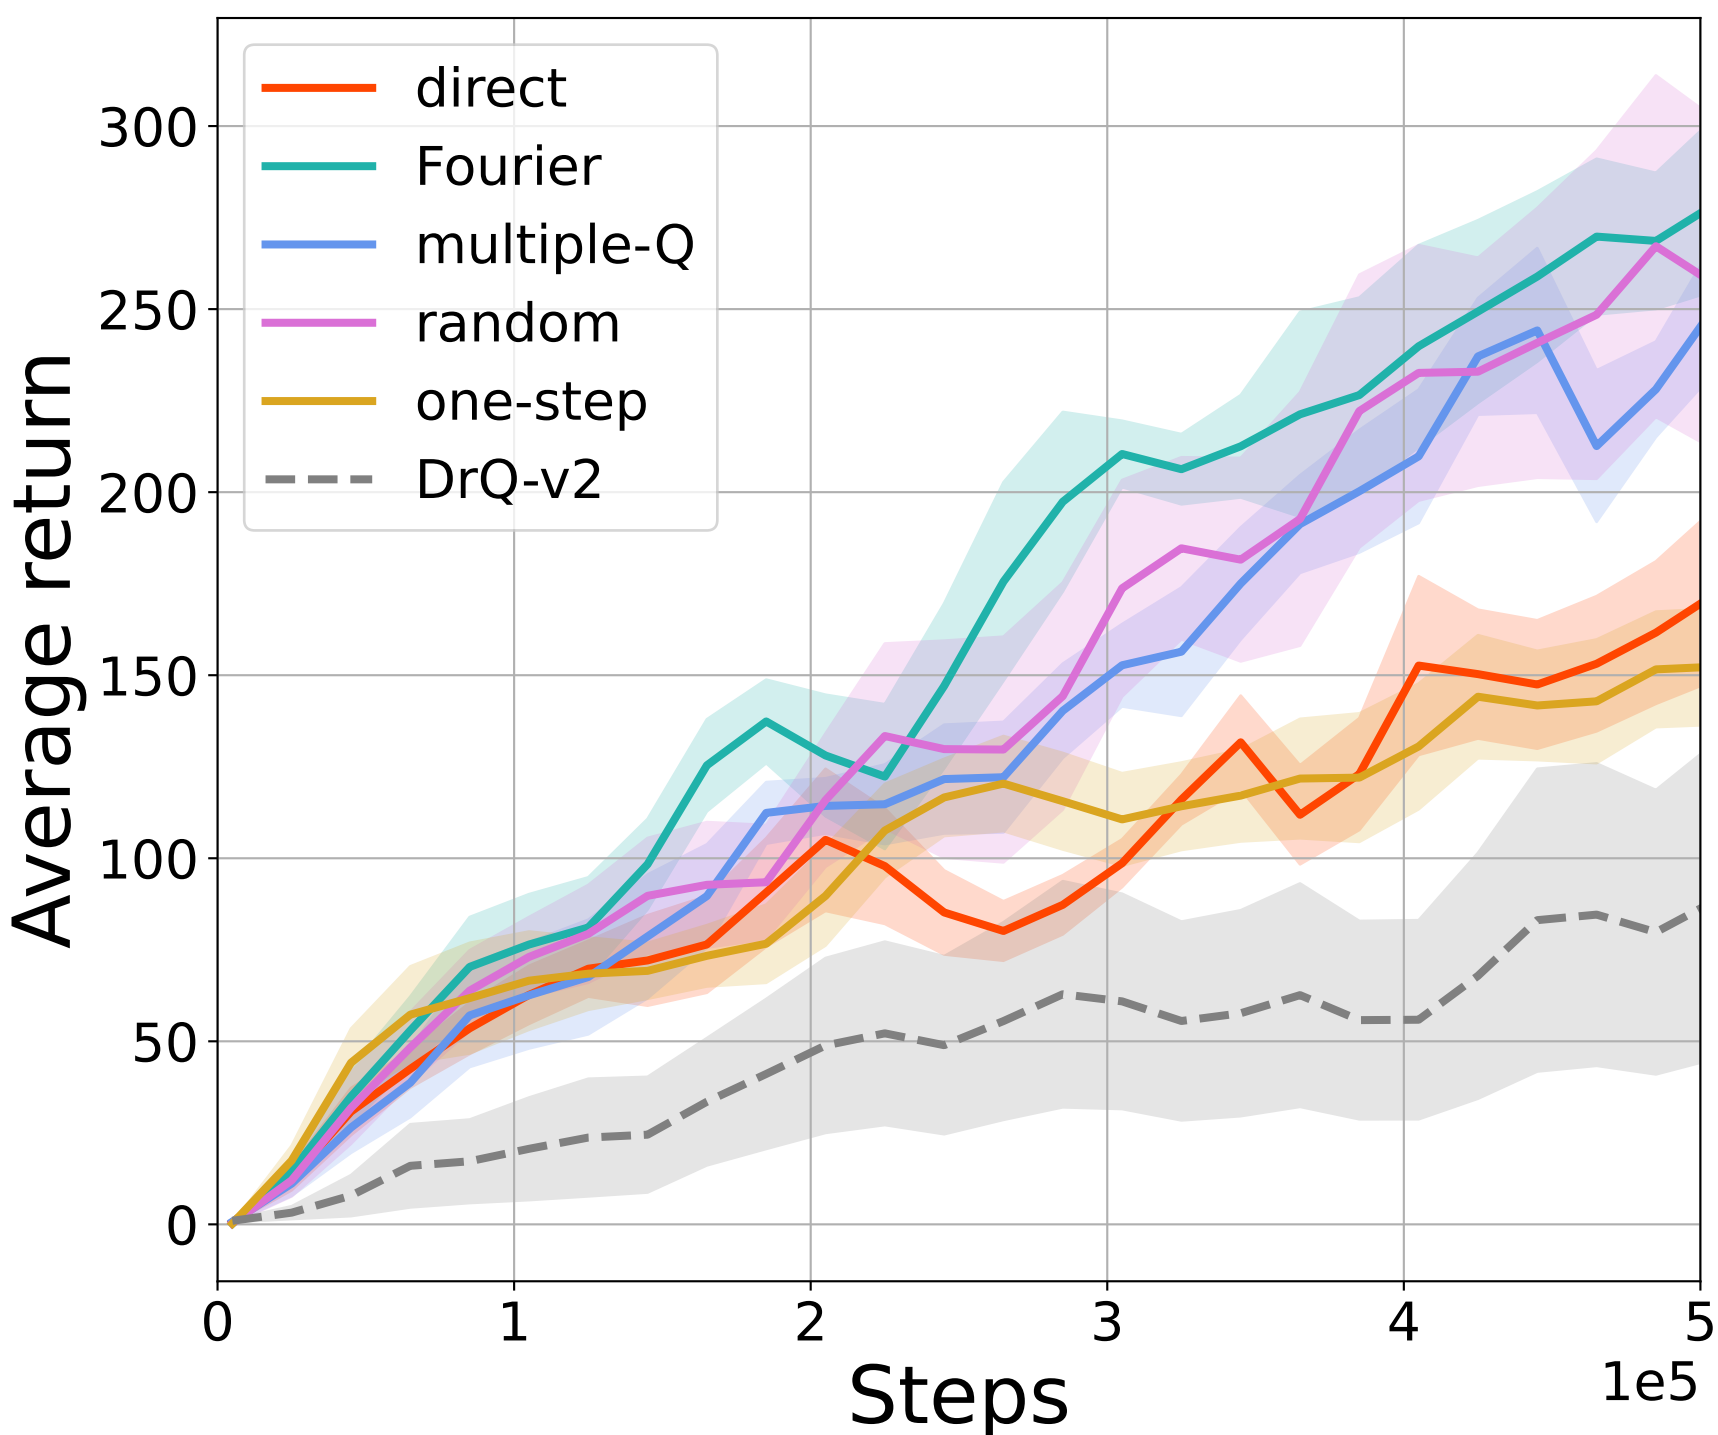

# Reacher Easy

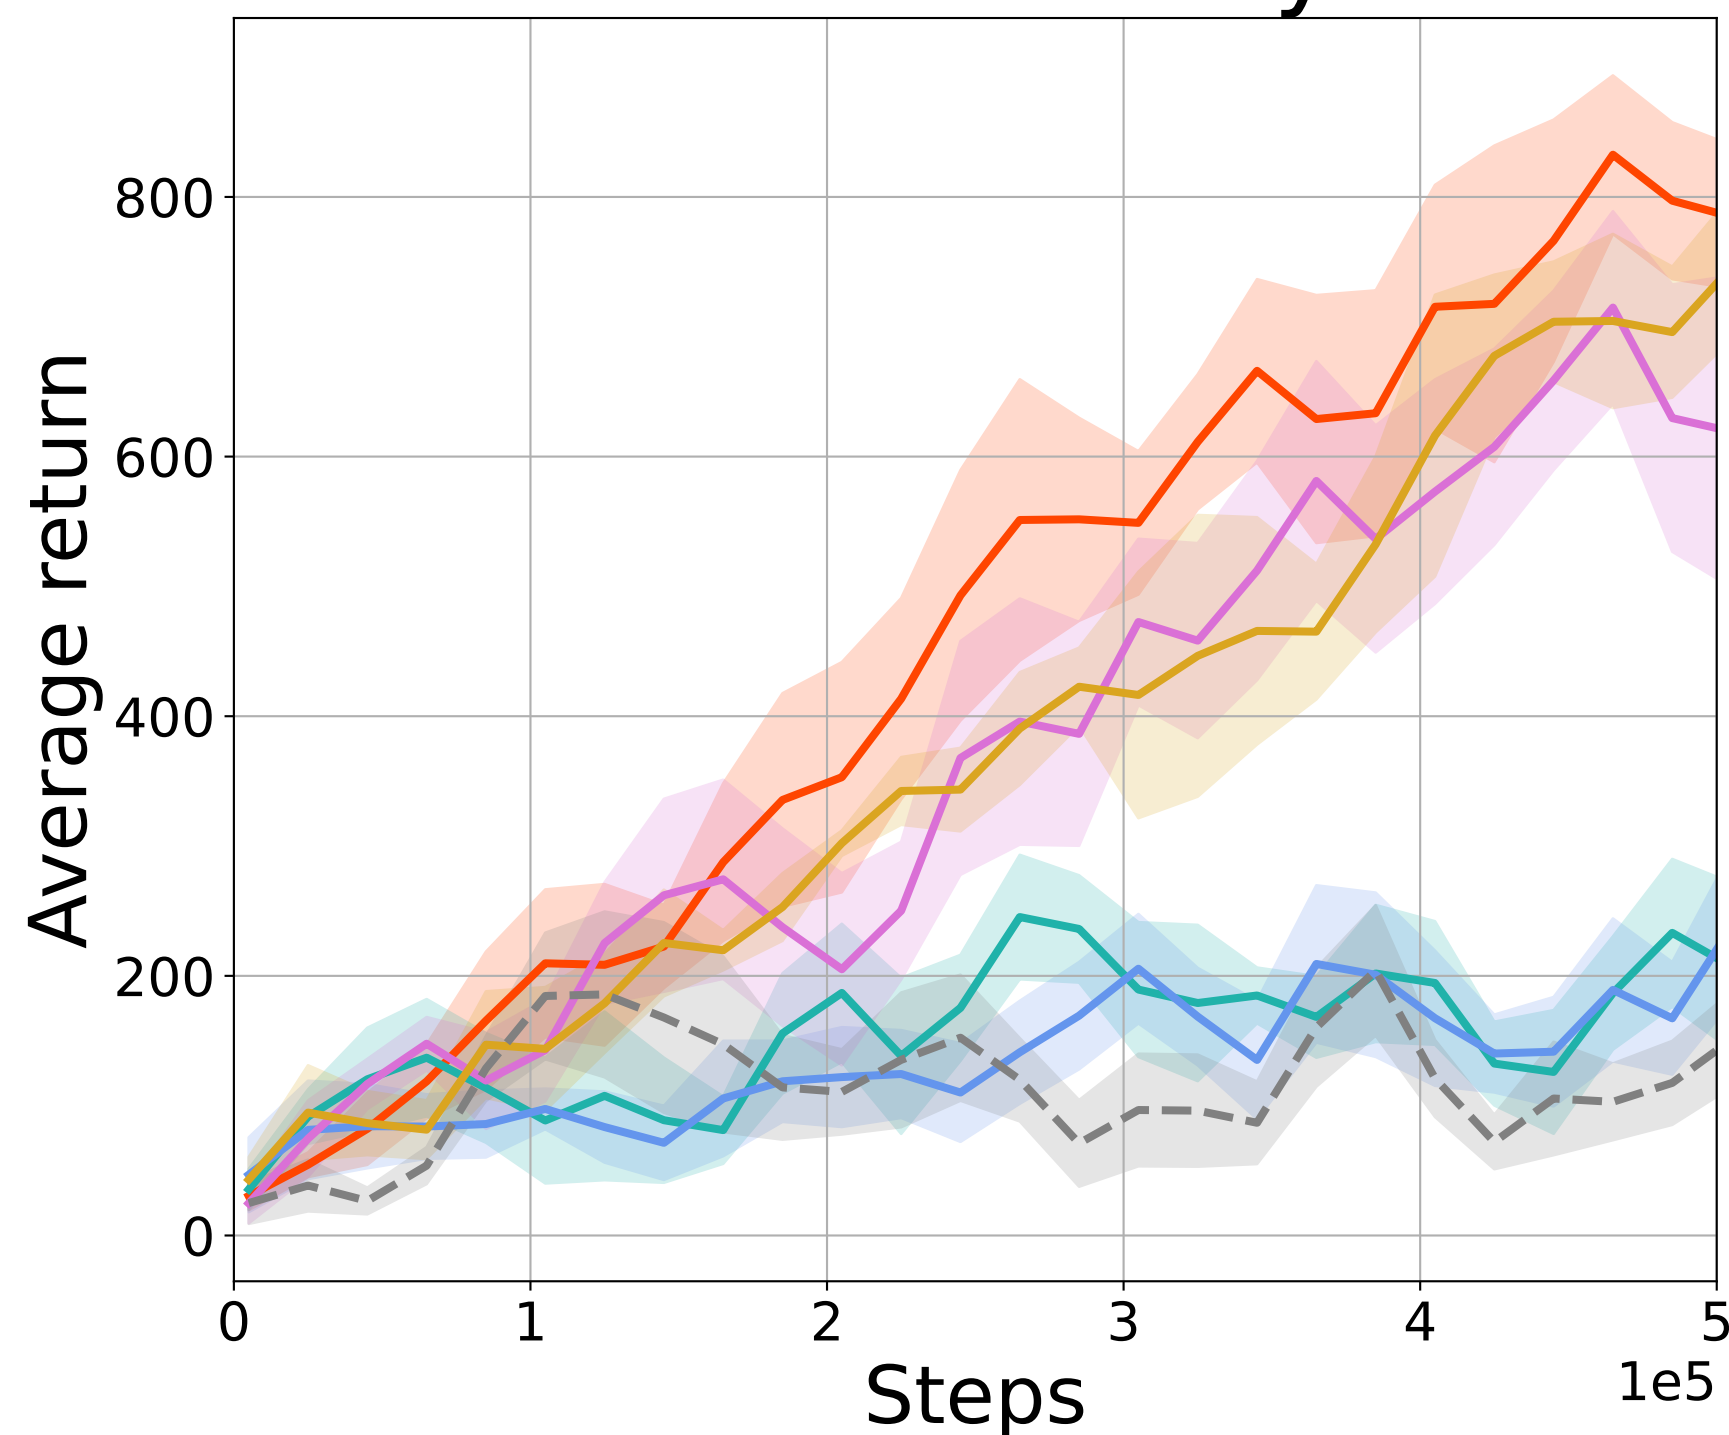

# Cartpole Swingup

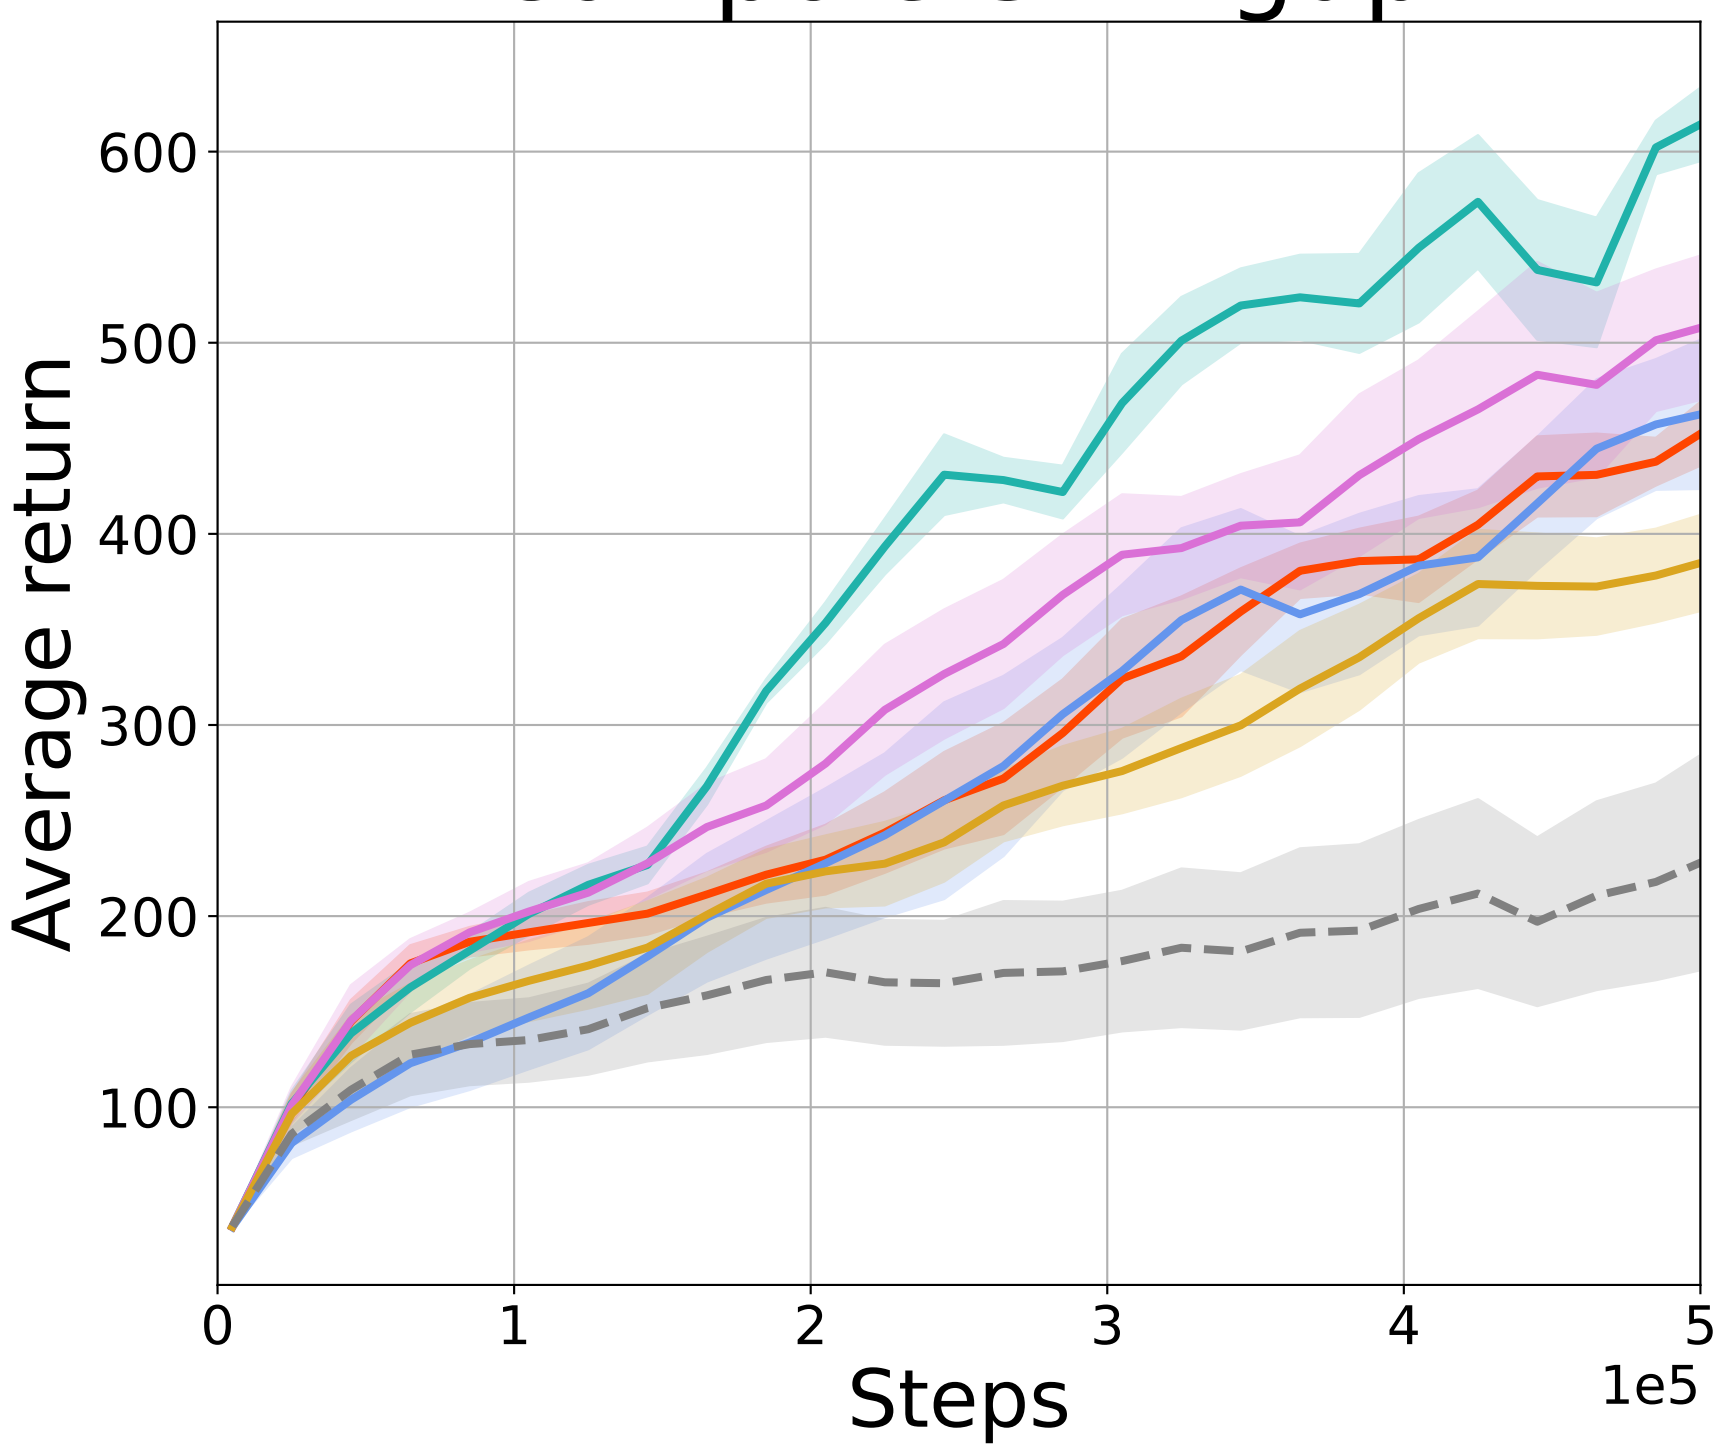

# Ball in Cup Catch

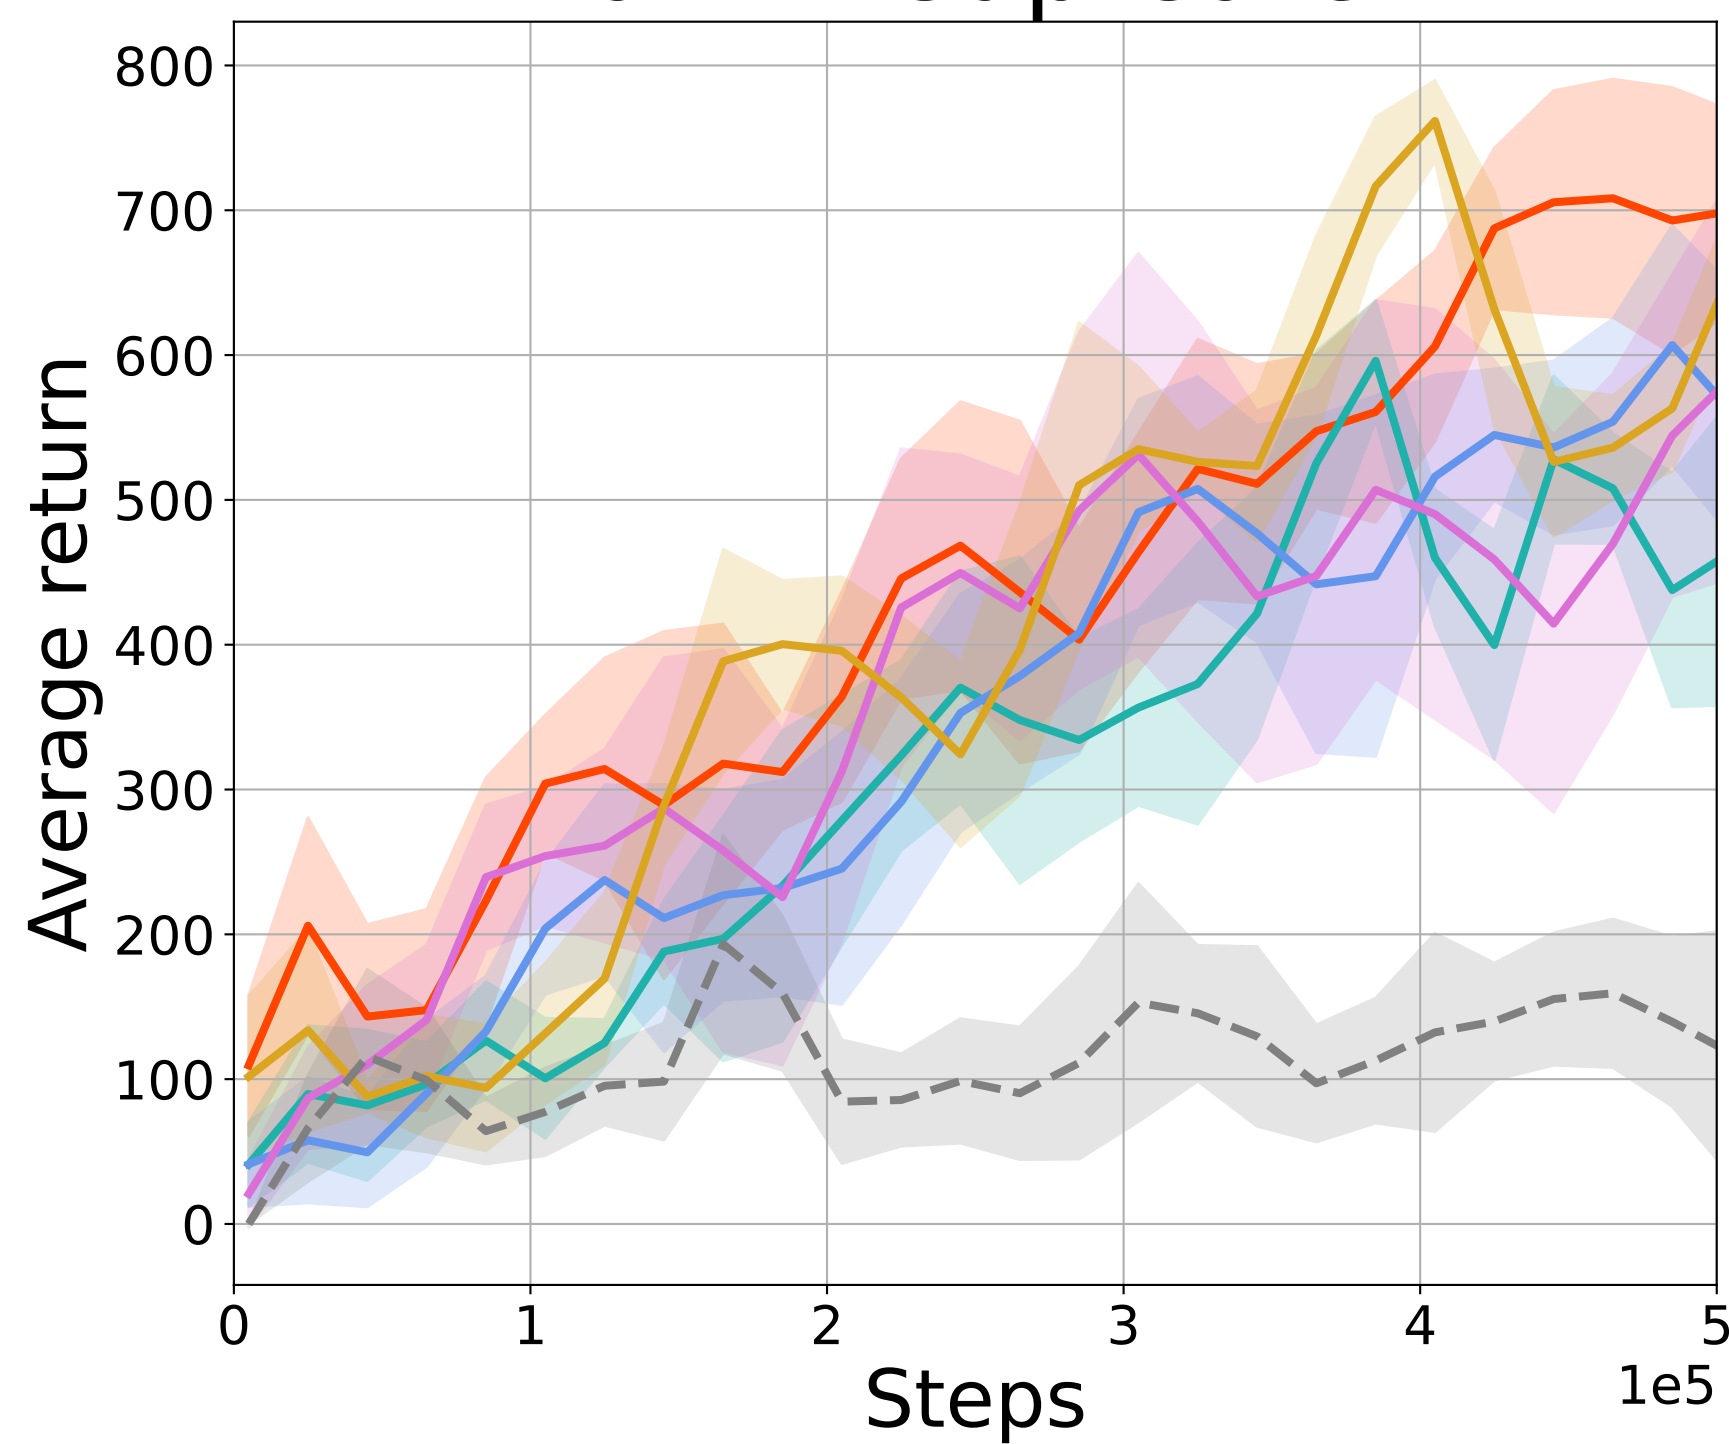

Supplement: supplementary_material [file attachment]

### Max Pred. Q

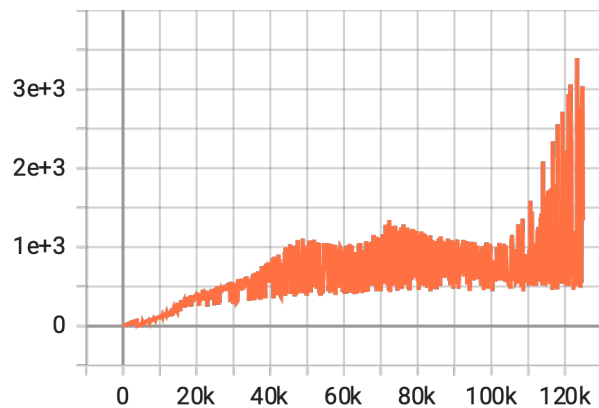

### Q loss

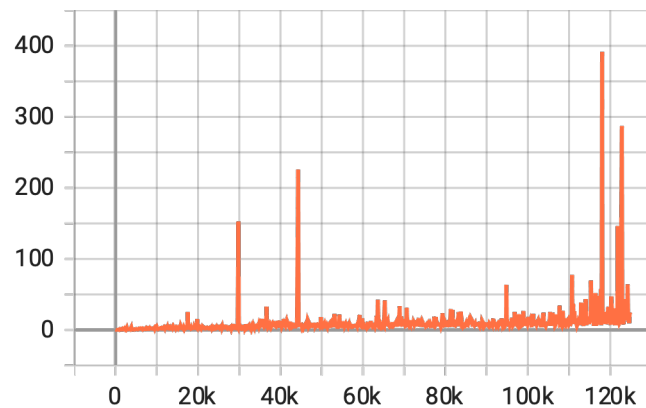

### Average return

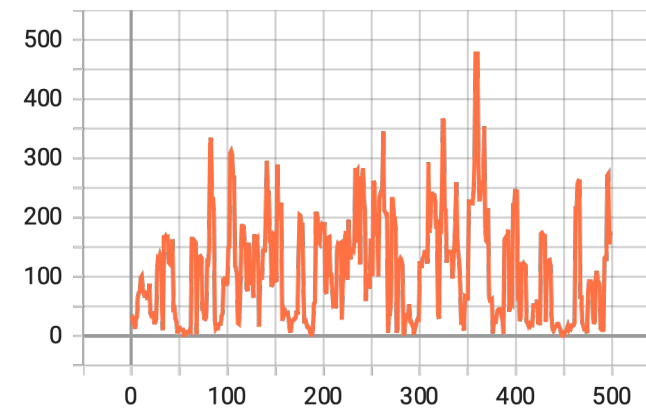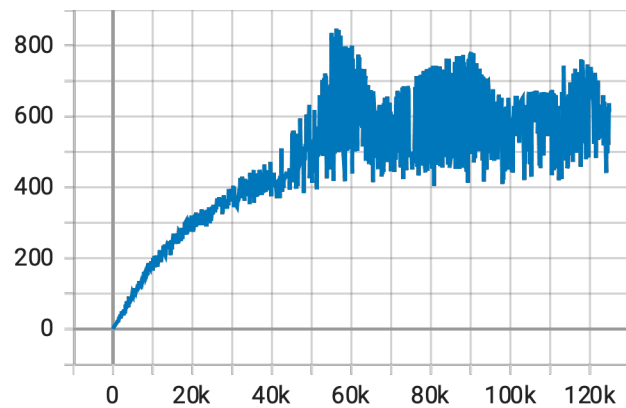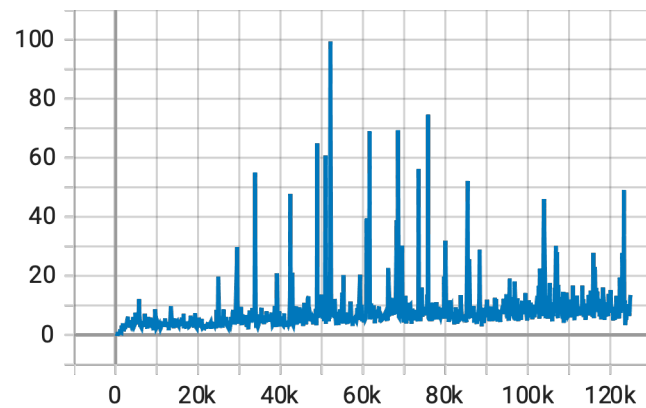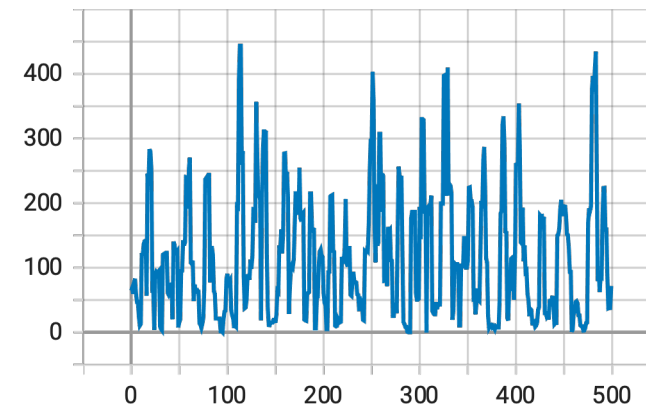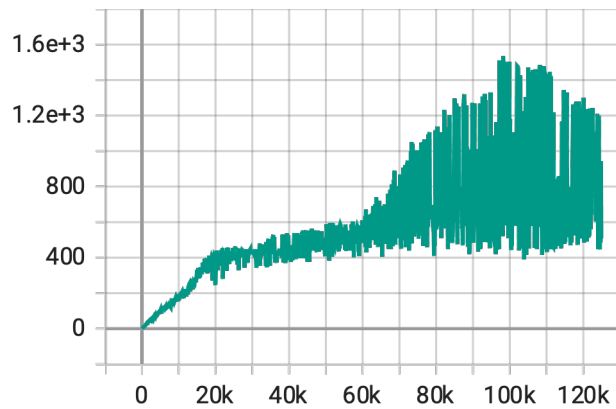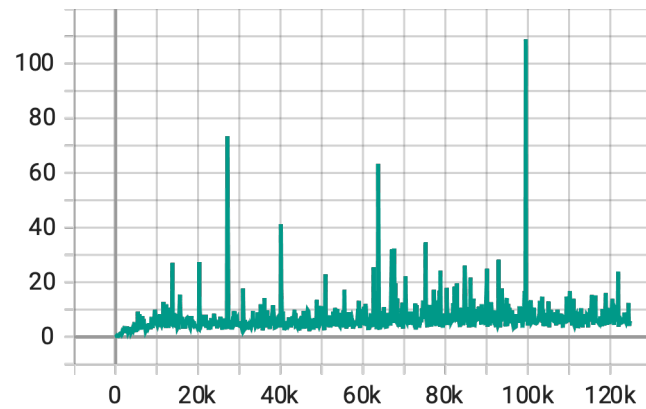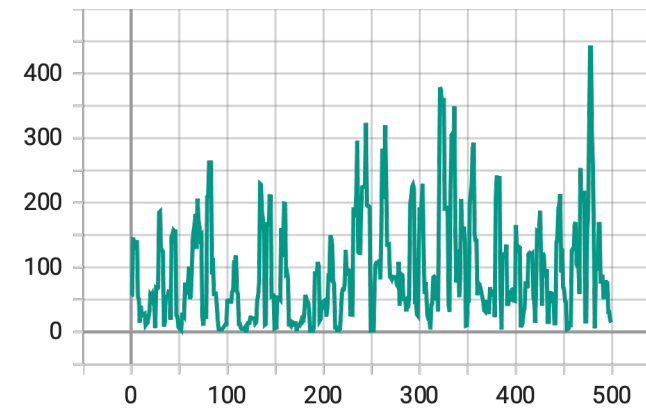

Supplement: supplementary_material [file attachment]

Cheetah Run

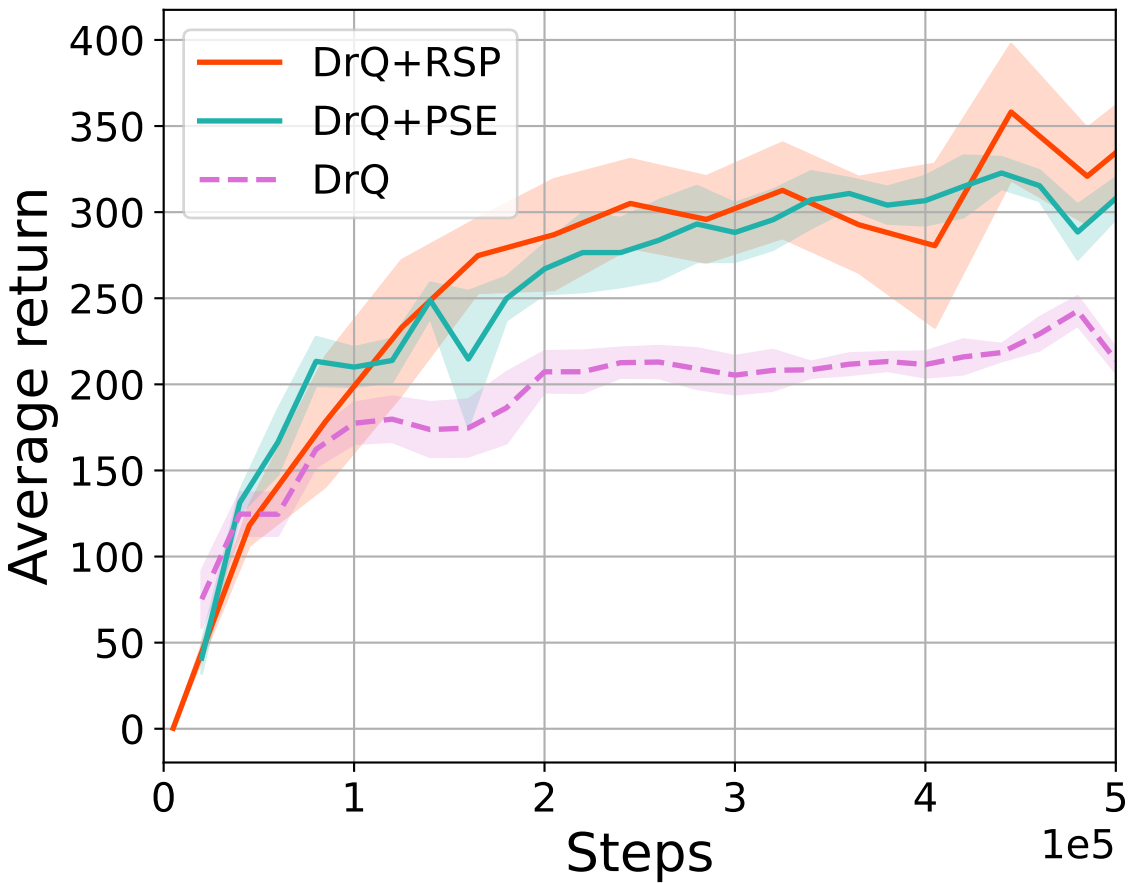

Finger Spin

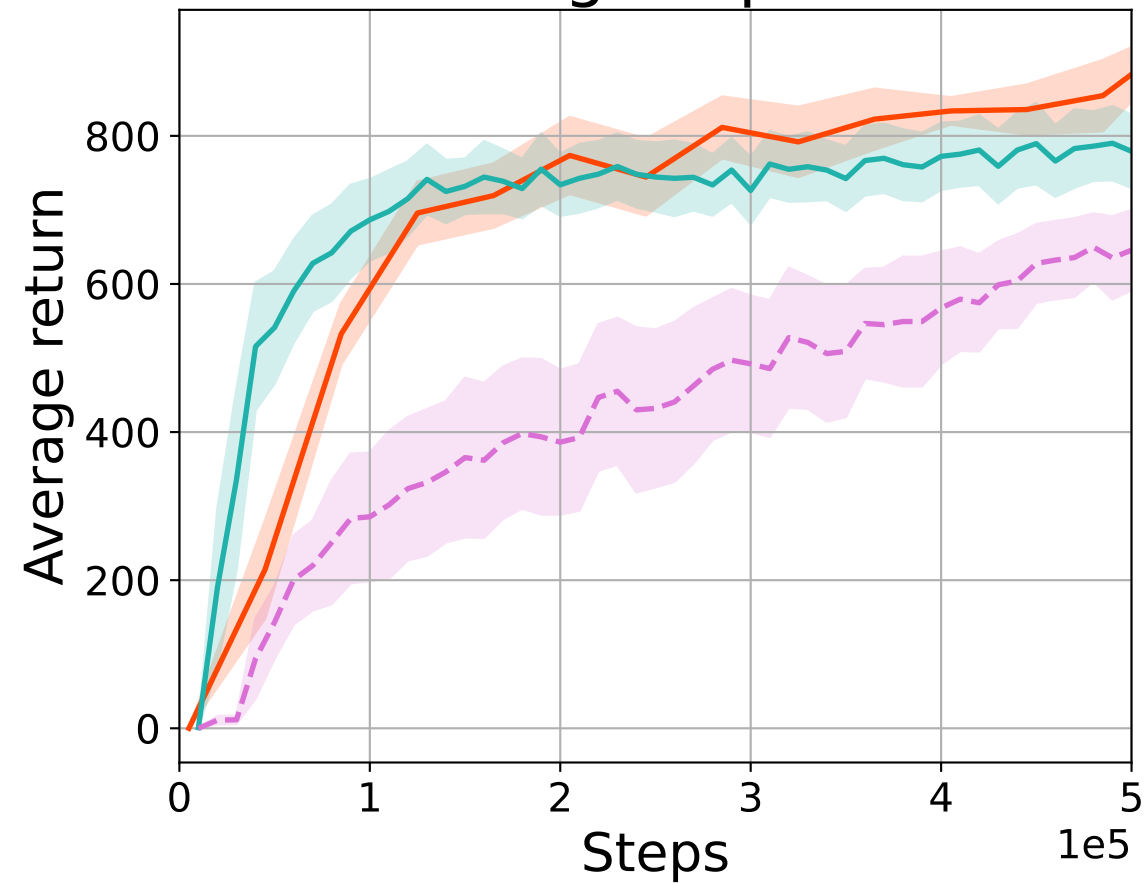

Cartpole Swingup

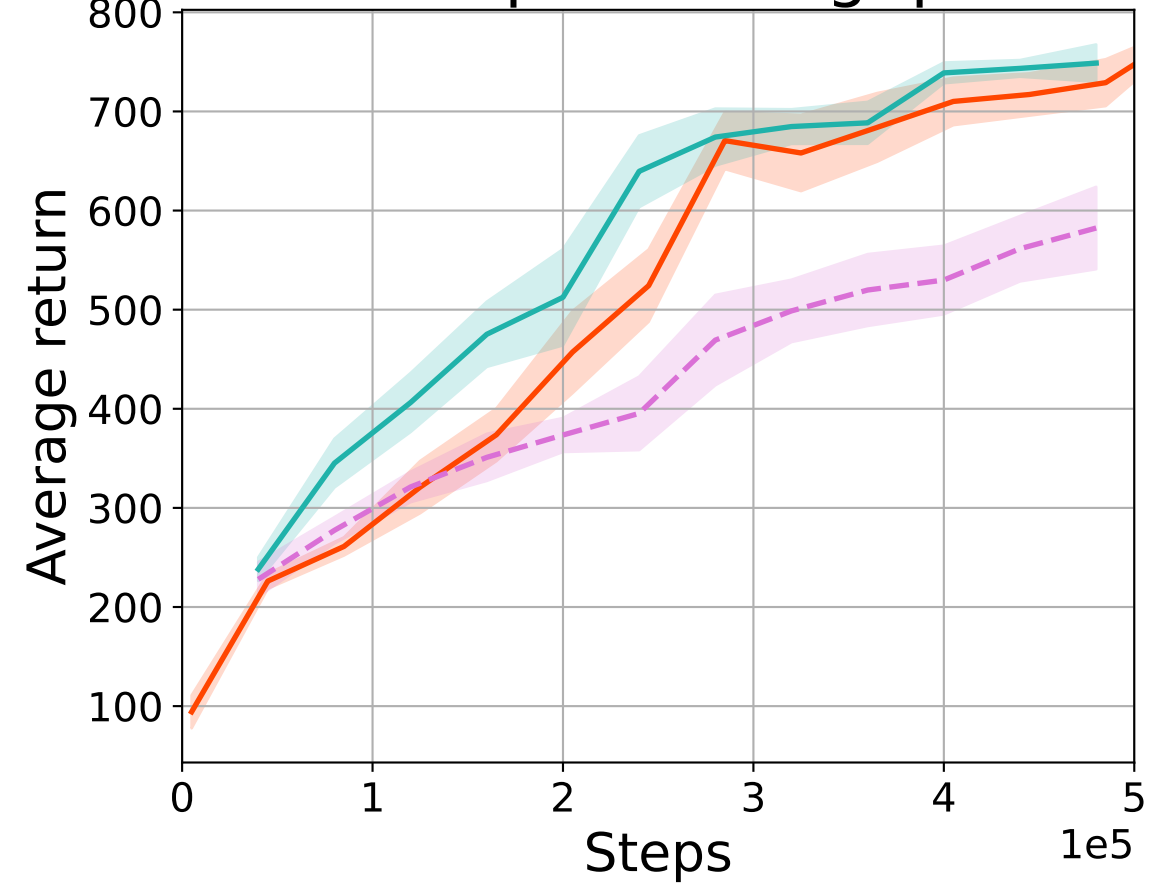

Walker Walk

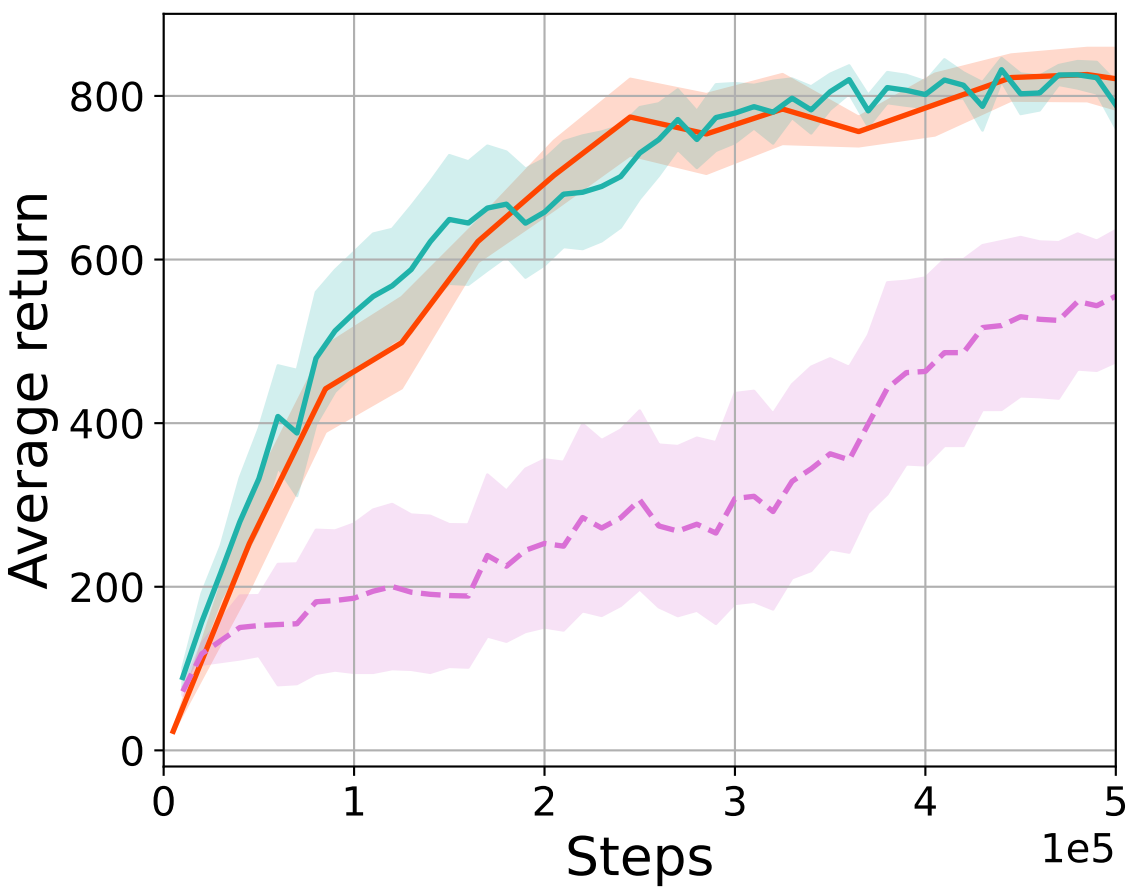

Reacher Easy

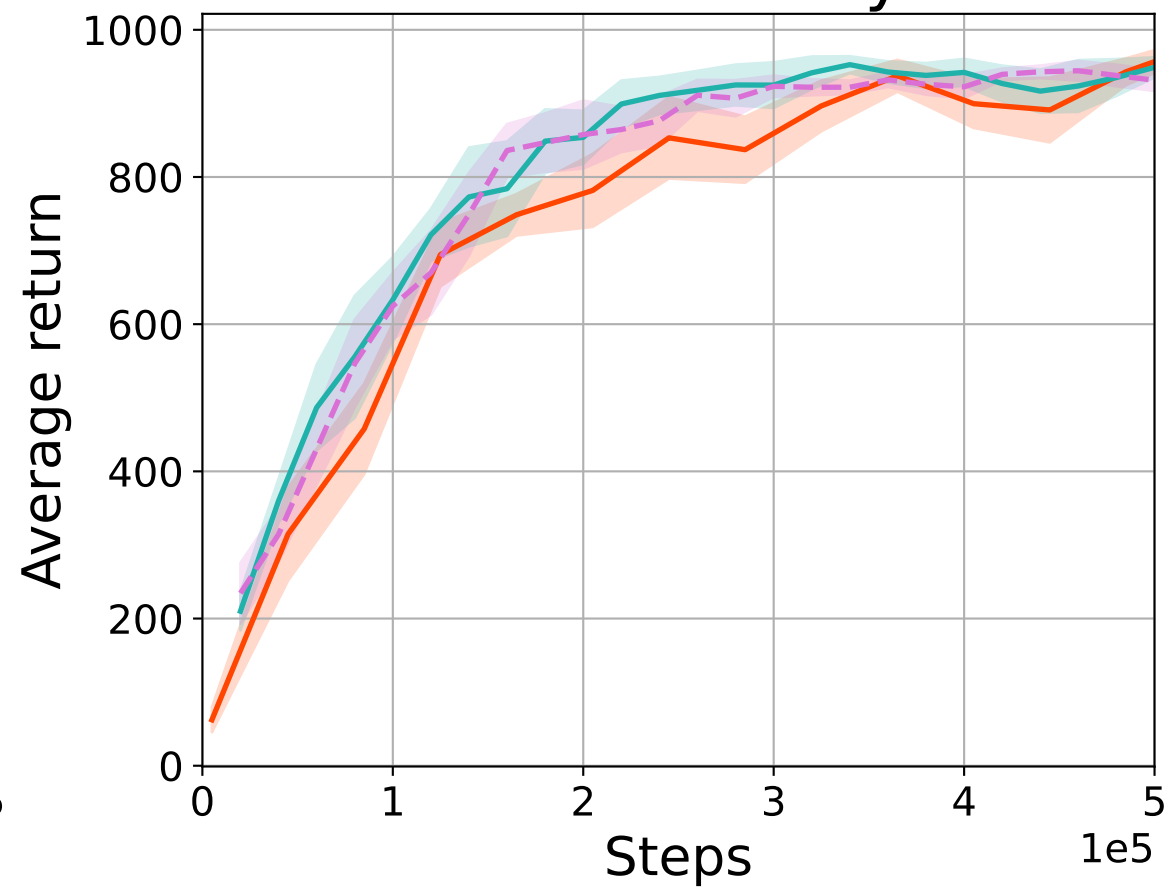

Ball in Cup Catch

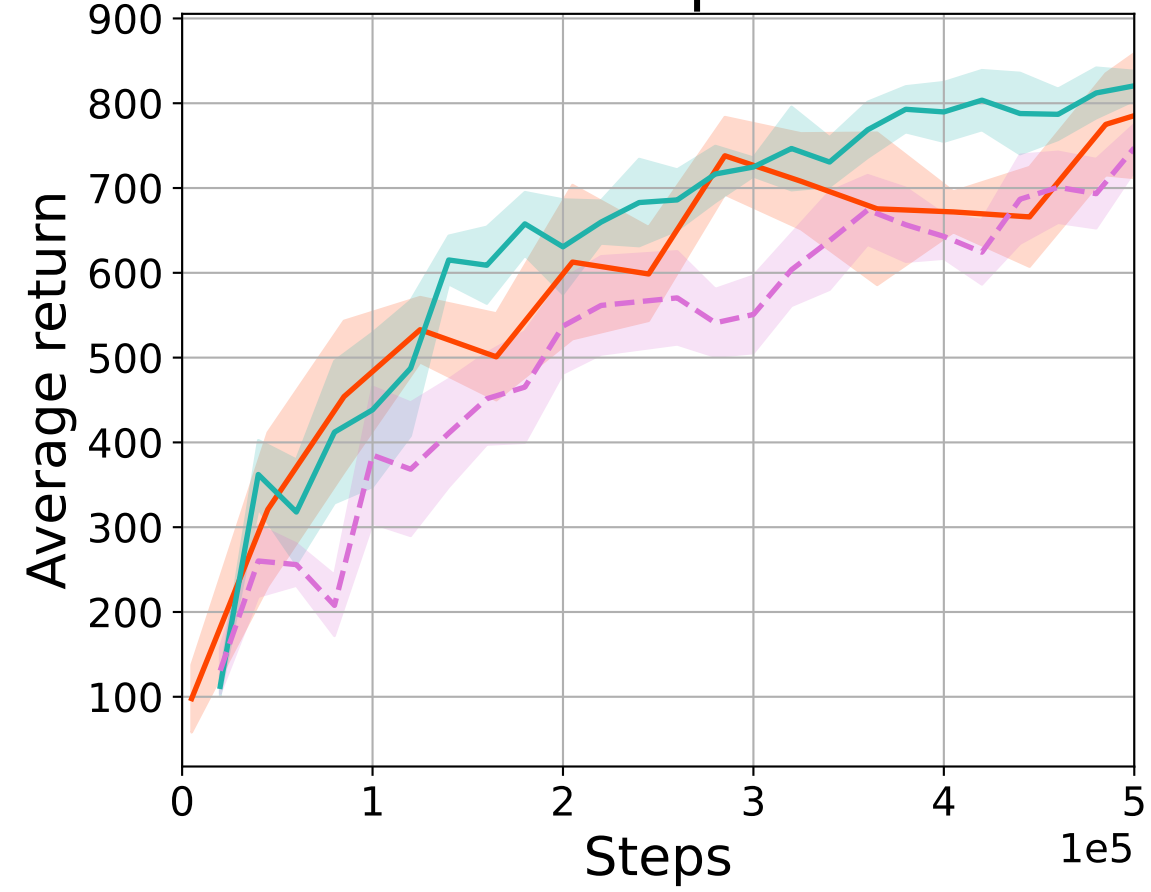

Supplement: supplementary_material [file attachment]
